# Supplementary material for: [Retracted] Potential Drug Prediction of Glioblastoma Based on Drug Perturbation‐Induced Gene Expression Signatures
Source: Hindawi journal article supplement (doi:10.1155/2021/6659701), 2021-01-01
Supplement: f1 [file 6659701.f1.pdf]

Supplementary Table 1. The log<sub>2</sub>FC and adjusted p value of 1771 DEGs between GBM and normal samples

| gene_id      | baseMean   | log2FoldChange | lfcSE      | stat        | pvalue     | padj       |
|--------------|------------|----------------|------------|-------------|------------|------------|
| HBG1         | 102.137181 | -25.39373789   | 2.98689156 | -8.50172742 | 1.87E-17   | 3.14E-13   |
| ATP6V1G2     | 130.753003 | -24.54980043   | 2.9868344  | -8.21933765 | 2.05E-16   | 1.72E-12   |
| ANKRD18B     | 32.3245232 | -23.81714251   | 2.98745633 | -7.9723818  | 1.56E-15   | 8.72E-12   |
| FAM153B      | 16.5290563 | -22.61951484   | 2.98824612 | -7.56949526 | 3.75E-14   | 1.26E-10   |
| CARTPT       | 39.1655053 | -7.979529042   | 2.14387777 | -3.72200745 | 0.00019765 | 0.00564385 |
| TRHDE        | 34.0133253 | -7.77956427    | 1.78082913 | -4.36850686 | 1.25E-05   | 0.00080852 |
| CDH18        | 53.2394051 | -7.713763234   | 1.66214194 | -4.6408571  | 3.47E-06   | 0.00033898 |
| GABRG1       | 55.3127153 | -7.579832252   | 1.26439128 | -5.994847   | 2.04E-09   | 1.80E-06   |
| GLRA3        | 52.6384921 | -7.525405668   | 1.22551037 | -6.14062995 | 8.22E-10   | 8.63E-07   |
| CBLN2        | 21.1918419 | -7.520138452   | 2.35902526 | -3.18781599 | 0.00143352 | 0.02082007 |
| HCN1         | 63.3324792 | -7.291241293   | 1.56467844 | -4.6598976  | 3.16E-06   | 0.00032416 |
| MAL2         | 75.665562  | -7.166429628   | 1.65969804 | -4.31791173 | 1.58E-05   | 0.000966   |
| PRKG2        | 12.175708  | -7.132908559   | 1.19321187 | -5.97790615 | 2.26E-09   | 1.88E-06   |
| PLCH1        | 20.0737325 | -7.002759862   | 2.44250226 | -2.86704335 | 0.00414326 | 0.04229853 |
| PVALB        | 272.849952 | -6.954727652   | 1.50897016 | -4.60892325 | 4.05E-06   | 0.00037167 |
| SYT14        | 14.3189027 | -6.947871272   | 1.56759667 | -4.43218042 | 9.33E-06   | 0.00065044 |
| CYP4F35P     | 10.6214743 | -6.937225135   | 1.63486762 | -4.24329471 | 2.20E-05   | 0.00122966 |
| HTR5A        | 38.5958977 | -6.915043043   | 2.18232573 | -3.16865762 | 0.00153145 | 0.02175954 |
| KCNV1        | 33.7865307 | -6.875054015   | 2.22794557 | -3.08582675 | 0.00202987 | 0.02633973 |
| UGT2B17      | 9.98073154 | -6.855697447   | 1.60556074 | -4.26997078 | 1.95E-05   | 0.00113673 |
| GABRA4       | 37.6929411 | -6.841680497   | 1.23001749 | -5.5622628  | 2.66E-08   | 1.32E-05   |
| NEUROD6      | 51.0243273 | -6.836249297   | 1.73235614 | -3.94621472 | 7.94E-05   | 0.00293226 |
| CYP4Z1       | 9.8113284  | -6.82015317    | 1.2498287  | -5.45687033 | 4.85E-08   | 2.09E-05   |
| SERTM1       | 33.9838961 | -6.807610721   | 1.80524082 | -3.77102636 | 0.00016258 | 0.00488721 |
| LOC100128554 | 9.2065482  | -6.730638385   | 1.60294019 | -4.19893296 | 2.68E-05   | 0.00142608 |
| UNC13C       | 61.2936289 | -6.697918982   | 1.78365167 | -3.7551721  | 0.00017322 | 0.00511569 |
| CACNG3       | 112.853492 | -6.631941284   | 1.84746579 | -3.58975051 | 0.00033099 | 0.00800733 |
| ANKRD30B     | 8.41162731 | -6.599943611   | 1.63800604 | -4.02925475 | 5.60E-05   | 0.00233313 |
| DKK2         | 8.24781412 | -6.578811458   | 1.51355695 | -4.34658997 | 1.38E-05   | 0.00087022 |
| LOC440040    | 30.4624646 | -6.568825311   | 2.14443627 | -3.06319446 | 0.00218988 | 0.02781458 |
| PTPRR        | 37.1777889 | -6.471298928   | 1.92539108 | -3.36103091 | 0.00077652 | 0.0136922  |
| OR2M4        | 7.66161657 | -6.467818367   | 1.43021818 | -4.52225992 | 6.12E-06   | 0.00048268 |
| OMD          | 10.2271106 | -6.458214461   | 1.44624907 | -4.46549257 | 7.99E-06   | 0.00058112 |
| KLHL1        | 9.89095372 | -6.415530011   | 1.39880634 | -4.58643189 | 4.51E-06   | 0.00038639 |
| RXFP1        | 43.1707944 | -6.395579975   | 1.75182769 | -3.65080425 | 0.00026142 | 0.00681071 |
| SYNPR        | 450.117274 | -6.306731585   | 1.8160677  | -3.47274036 | 0.00051517 | 0.0105316  |
| GABRA2       | 81.1370646 | -6.260981156   | 1.11130311 | -5.63390951 | 1.76E-08   | 9.25E-06   |
| GABRA5       | 57.5451509 | -6.217014417   | 1.77609149 | -3.50039087 | 0.00046458 | 0.00989203 |
| HTR3B        | 6.38535336 | -6.203413754   | 1.7343693  | -3.57675482 | 0.00034789 | 0.00824021 |
| CRYM         | 155.740295 | -6.188619945   | 1.57657331 | -3.92536136 | 8.66E-05   | 0.00312279 |
| NEFM         | 599.840344 | -6.153411313   | 1.48979445 | -4.13037604 | 3.62E-05   | 0.00171705 |
| GALNTL5      | 8.27137922 | -6.148148081   | 1.63145733 | -3.7685007  | 0.00016423 | 0.00491932 |
| C2orf65      | 10.9707737 | -6.137600102   | 1.34871191 | -4.55071246 | 5.35E-06   | 0.00044257 |
| CDH8         | 51.0485887 | -6.087768671   | 0.9907271  | -6.14474833 | 8.01E-10   | 8.63E-07   |
| VSNL1        | 4463.11221 | -6.073191914   | 1.33009407 | -4.56598675 | 4.97E-06   | 0.00041357 |

|              |            |              |            |             |            |            |
|--------------|------------|--------------|------------|-------------|------------|------------|
| SYT1         | 1139.94251 | -6.05896067  | 1.04838942 | -5.77930354 | 7.50E-09   | 5.04E-06   |
| C1QL3        | 108.863384 | -6.058830613 | 2.04959112 | -2.95611674 | 0.00311539 | 0.03478474 |
| HOOK1        | 7.70670188 | -6.044107501 | 1.46173886 | -4.13487503 | 3.55E-05   | 0.00170026 |
| ZNF804B      | 7.62081081 | -6.029933776 | 1.43397453 | -4.20504942 | 2.61E-05   | 0.00139247 |
| OLFM3        | 118.049019 | -6.021516619 | 1.1458335  | -5.25514103 | 1.48E-07   | 4.29E-05   |
| OR3A2        | 7.45797047 | -5.99534895  | 1.3103697  | -4.57531102 | 4.76E-06   | 0.00040356 |
| ANKRD26P3    | 5.33779791 | -5.941355103 | 1.69557403 | -3.50403757 | 0.00045826 | 0.00983249 |
| PPP3R2       | 5.23407189 | -5.913943916 | 1.44910475 | -4.08110174 | 4.48E-05   | 0.00201931 |
| TCERG1L      | 7.0022037  | -5.910639537 | 1.31352703 | -4.49982331 | 6.80E-06   | 0.00052184 |
| EPHA6        | 18.0231846 | -5.865525625 | 1.45494509 | -4.03144124 | 5.54E-05   | 0.00232305 |
| KIAA0748     | 239.412017 | -5.834968376 | 1.07698805 | -5.41785804 | 6.03E-08   | 2.31E-05   |
| RALYL        | 8.95625089 | -5.834400765 | 1.37732827 | -4.23602774 | 2.28E-05   | 0.00126591 |
| HTR2A        | 233.468064 | -5.825922527 | 0.91277767 | -6.38263039 | 1.74E-10   | 3.19E-07   |
| GRIN3A       | 47.8795641 | -5.789179151 | 1.25001726 | -4.63127936 | 3.63E-06   | 0.00034896 |
| SNAP25       | 1803.07336 | -5.787358386 | 1.0272433  | -5.6338731  | 1.76E-08   | 9.25E-06   |
| CDH12        | 6.37478975 | -5.775826606 | 1.71508524 | -3.36766154 | 0.00075809 | 0.01359539 |
| LOC100507387 | 21.427565  | -5.750352503 | 1.36342382 | -4.21758254 | 2.47E-05   | 0.00133855 |
| MTMR7        | 131.771729 | -5.720131007 | 1.11713183 | -5.12037241 | 3.05E-07   | 7.02E-05   |
| ANK3         | 15.4162757 | -5.714019927 | 1.22142279 | -4.67816712 | 2.89E-06   | 0.00030211 |
| MIR31HG      | 149.794822 | -5.712949833 | 1.38849553 | -4.11448918 | 3.88E-05   | 0.00180626 |
| RAB3C        | 84.0104796 | -5.710791035 | 1.48527617 | -3.84493549 | 0.00012058 | 0.0039499  |
| LRFN5        | 86.5192584 | -5.683648553 | 1.11177069 | -5.11224896 | 3.18E-07   | 7.08E-05   |
| SLITRK4      | 35.4928187 | -5.669633453 | 1.28512005 | -4.41175394 | 1.03E-05   | 0.00068916 |
| LOC100129480 | 16.9506949 | -5.665752982 | 1.21400589 | -4.6669897  | 3.06E-06   | 0.0003151  |
| KCNJ3        | 119.719015 | -5.659531046 | 1.58037201 | -3.58113851 | 0.0003421  | 0.00814257 |
| OR2M5        | 5.8362218  | -5.650019061 | 1.40538144 | -4.02027442 | 5.81E-05   | 0.00238832 |
| RYR2         | 78.5718218 | -5.634610326 | 1.16123673 | -4.85224947 | 1.22E-06   | 0.00017837 |
| SLC35F3      | 27.9544772 | -5.626239006 | 1.14842643 | -4.89908526 | 9.63E-07   | 0.00014844 |
| CNTN5        | 34.5211295 | -5.624922992 | 1.65235821 | -3.40417893 | 0.00066363 | 0.01239076 |
| SLC4A10      | 100.222129 | -5.619881759 | 1.0995496  | -5.11107615 | 3.20E-07   | 7.08E-05   |
| PCSK2        | 56.2031867 | -5.60813262  | 1.13046822 | -4.96089364 | 7.02E-07   | 0.00011886 |
| POU6F2       | 9.67677204 | -5.585789292 | 1.35409134 | -4.12512003 | 3.71E-05   | 0.00174414 |
| ZNF385B      | 22.830121  | -5.567385521 | 1.32079776 | -4.21516882 | 2.50E-05   | 0.00134582 |
| GAD2         | 127.859653 | -5.558952998 | 1.85646153 | -2.99438093 | 0.00275002 | 0.03195809 |
| TMEM132D     | 39.6947813 | -5.540605535 | 1.11418724 | -4.97277777 | 6.60E-07   | 0.00011553 |
| KCNC1        | 7.19452932 | -5.517848446 | 1.76089615 | -3.13354564 | 0.00172708 | 0.02369516 |
| OR2AK2       | 19.8423412 | -5.51595537  | 1.396104   | -3.95096309 | 7.78E-05   | 0.00291932 |
| KRT222       | 153.248827 | -5.509976399 | 1.72413518 | -3.19579141 | 0.00139448 | 0.02046535 |
| FLT3         | 6.97448146 | -5.505157725 | 1.33780722 | -4.11506057 | 3.87E-05   | 0.00180626 |
| GNG3         | 220.295443 | -5.50215104  | 1.0005373  | -5.49919635 | 3.82E-08   | 1.78E-05   |
| RIMS1        | 2554.15401 | -5.489942391 | 1.0397355  | -5.28013365 | 1.29E-07   | 3.94E-05   |
| KCNH5        | 24.068585  | -5.479829501 | 1.31746201 | -4.15938332 | 3.19E-05   | 0.00159118 |
| NEGR1        | 166.640485 | -5.454261841 | 0.90969525 | -5.99570221 | 2.03E-09   | 1.80E-06   |
| SV2C         | 25.6650453 | -5.446216589 | 1.14673594 | -4.74932058 | 2.04E-06   | 0.00024853 |
| OR2L2        | 16.4256739 | -5.439181044 | 1.18194363 | -4.60189548 | 4.19E-06   | 0.00037568 |
| MAS1         | 21.3040901 | -5.411019148 | 1.92003149 | -2.81819292 | 0.00482948 | 0.04674801 |
| TMEM155      | 115.873285 | -5.399418114 | 1.57716399 | -3.42349823 | 0.00061821 | 0.01181837 |
| ATP8A2       | 125.632614 | -5.393809308 | 1.08906971 | -4.95267591 | 7.32E-07   | 0.00012059 |

|           |            |              |            |             |            |            |
|-----------|------------|--------------|------------|-------------|------------|------------|
| DHRS9     | 98.3326426 | -5.393593899 | 0.75982522 | -7.0984665  | 1.26E-12   | 3.53E-09   |
| BMP3      | 3.64955774 | -5.39044448  | 1.82846668 | -2.9480682  | 0.00319767 | 0.0353743  |
| CAMK2A    | 542.60843  | -5.383520608 | 1.36720917 | -3.93759839 | 8.23E-05   | 0.00298702 |
| ADH1B     | 21.456751  | -5.379585479 | 1.00973875 | -5.32770031 | 9.95E-08   | 3.34E-05   |
| CALHM1    | 3.58872057 | -5.369788083 | 1.89395095 | -2.8352308  | 0.00457926 | 0.04512029 |
| CASQ2     | 8.76146128 | -5.36245365  | 1.06058104 | -5.05614702 | 4.28E-07   | 8.39E-05   |
| LINC00320 | 29.1895754 | -5.35261267  | 1.2715243  | -4.20960312 | 2.56E-05   | 0.00137342 |
| SLC22A10  | 4.71608926 | -5.339136054 | 1.91648338 | -2.78590262 | 0.00533789 | 0.04974926 |
| KIF6      | 57.1506704 | -5.335755772 | 1.03505799 | -5.15503074 | 2.54E-07   | 6.00E-05   |
| LOC340017 | 3.49847947 | -5.330578804 | 1.59732162 | -3.33719817 | 0.00084628 | 0.01445573 |
| OR2L1P    | 19.2607076 | -5.313986417 | 1.18162338 | -4.49719131 | 6.89E-06   | 0.00052594 |
| SSTR1     | 6.15842021 | -5.291569432 | 1.73972162 | -3.04161848 | 0.0023531  | 0.02909563 |
| SH3GL3    | 378.041336 | -5.290631236 | 1.10121653 | -4.80435144 | 1.55E-06   | 0.00020542 |
| ST8SIA3   | 51.129544  | -5.287565941 | 1.21492398 | -4.35217842 | 1.35E-05   | 0.00085673 |
| CCDC144NL | 8.3370186  | -5.2796155   | 1.68261699 | -3.13774051 | 0.00170256 | 0.02354711 |
| GRM1      | 171.783533 | -5.278191552 | 1.09337245 | -4.8274415  | 1.38E-06   | 0.00019206 |
| CREG2     | 154.760649 | -5.261039946 | 1.09711696 | -4.79533187 | 1.62E-06   | 0.00021156 |
| RSPO3     | 17.5940599 | -5.260486763 | 1.51357892 | -3.47552855 | 0.00050985 | 0.01049936 |
| SEMA3D    | 24.2302001 | -5.254936899 | 0.9164647  | -5.73392175 | 9.81E-09   | 6.11E-06   |
| CALY      | 184.954786 | -5.236886321 | 1.47923793 | -3.54025963 | 0.00039973 | 0.00902839 |
| TRPM3     | 54.7987397 | -5.224329833 | 0.96437403 | -5.41732736 | 6.05E-08   | 2.31E-05   |
| SVOP      | 71.9227537 | -5.221661396 | 1.66713551 | -3.13211576 | 0.00173551 | 0.02374885 |
| EMX1      | 7.74287239 | -5.219932034 | 1.76942587 | -2.95007106 | 0.00317701 | 0.03521534 |
| DRD1      | 15.2960426 | -5.213075919 | 1.28097309 | -4.06962173 | 4.71E-05   | 0.00205699 |
| VIP       | 5.94946947 | -5.211754962 | 1.46515616 | -3.55713274 | 0.00037492 | 0.0086423  |
| OR2L13    | 5.81360192 | -5.207663604 | 1.33150118 | -3.91112204 | 9.19E-05   | 0.00324895 |
| STAT4     | 48.7493591 | -5.183256708 | 1.03361314 | -5.014697   | 5.31E-07   | 0.00010143 |
| SV2B      | 15.5962579 | -5.180667715 | 1.28126236 | -4.04340896 | 5.27E-05   | 0.00224677 |
| TDGF1     | 4.22890788 | -5.178780199 | 1.46082284 | -3.54511174 | 0.00039245 | 0.00893587 |
| PRKCG     | 77.7078348 | -5.164295036 | 1.54400243 | -3.34474541 | 0.00082358 | 0.0142669  |
| LGR5      | 24.6498964 | -5.14599705  | 1.06409128 | -4.83604852 | 1.32E-06   | 0.00018885 |
| TAC1      | 109.802547 | -5.143148544 | 1.44020957 | -3.57111121 | 0.00035547 | 0.00835429 |
| OR2L8     | 4.11997881 | -5.142206915 | 1.44046151 | -3.56983292 | 0.00035721 | 0.00837174 |
| CUX2      | 18.912275  | -5.141973636 | 1.4663534  | -3.50664011 | 0.0004538  | 0.00978908 |
| SERPINI1  | 112.360685 | -5.131108322 | 0.94394303 | -5.43582417 | 5.45E-08   | 2.22E-05   |
| STYK1     | 13.9978565 | -5.125231177 | 1.23379864 | -4.15402564 | 3.27E-05   | 0.00160511 |
| CDH19     | 53.3881392 | -5.124833087 | 1.0923352  | -4.69163047 | 2.71E-06   | 0.00029384 |
| SLCO1A2   | 300.664937 | -5.118506714 | 0.85318139 | -5.9993183  | 1.98E-09   | 1.80E-06   |
| FAM153C   | 149.780151 | -5.118367211 | 1.07297482 | -4.77025846 | 1.84E-06   | 0.00023073 |
| CA7       | 4.06566676 | -5.117875713 | 1.75489503 | -2.91634293 | 0.00354161 | 0.03789379 |
| ANKRD18DP | 5.53500508 | -5.115271757 | 1.31614098 | -3.88656825 | 0.00010167 | 0.0034796  |
| TRPM6     | 25.8375181 | -5.106360991 | 0.95953945 | -5.32167906 | 1.03E-07   | 3.39E-05   |
| CDR1      | 27857.6155 | -5.095509663 | 0.94787183 | -5.375737   | 7.63E-08   | 2.85E-05   |
| CAMK1G    | 45.1041367 | -5.08854409  | 1.25228823 | -4.06339689 | 4.84E-05   | 0.0020946  |
| LOC401134 | 6.89678375 | -5.087472699 | 1.2230925  | -4.15951589 | 3.19E-05   | 0.00159118 |
| SLC6A7    | 17.0942939 | -5.081624218 | 1.52046062 | -3.34216103 | 0.00083129 | 0.0143276  |
| OMG       | 410.044611 | -5.080253241 | 0.93040774 | -5.46024398 | 4.75E-08   | 2.09E-05   |
| STX1A     | 382.080937 | -5.077177511 | 1.41082637 | -3.59872599 | 0.00031978 | 0.00785611 |

|              |            |              |            |             |            |            |
|--------------|------------|--------------|------------|-------------|------------|------------|
| NELL1        | 33.081838  | -5.043788471 | 1.27687099 | -3.95011595 | 7.81E-05   | 0.00291932 |
| SLC12A5      | 76.0898987 | -5.027176567 | 1.11637351 | -4.50313138 | 6.70E-06   | 0.00051852 |
| OR2M2        | 2.76088682 | -4.992445974 | 1.59011471 | -3.13967662 | 0.00169134 | 0.02344707 |
| VAX1         | 4.97048049 | -4.989664652 | 1.35454591 | -3.6836438  | 0.00022992 | 0.00625184 |
| CKMT1B       | 164.132371 | -4.989449047 | 1.47642594 | -3.37941032 | 0.00072642 | 0.01321356 |
| CCL3L3       | 160.703646 | -4.988425488 | 1.76304122 | -2.82944348 | 0.0046629  | 0.04550257 |
| ELAVL4       | 65.94927   | -4.987119723 | 0.95818608 | -5.20475076 | 1.94E-07   | 5.10E-05   |
| SLC17A7      | 490.516857 | -4.984181583 | 1.31368549 | -3.79404479 | 0.00014821 | 0.00455401 |
| CPLX2        | 248.16058  | -4.978390234 | 1.67634326 | -2.96979165 | 0.00298002 | 0.03392698 |
| ACVR1C       | 30.575608  | -4.956407647 | 0.95416221 | -5.19451264 | 2.05E-07   | 5.23E-05   |
| PPP4R4       | 32.3698621 | -4.95333765  | 1.01689397 | -4.87104632 | 1.11E-06   | 0.00016508 |
| SLCO4C1      | 2.67477612 | -4.938545067 | 1.40615775 | -3.51208465 | 0.00044461 | 0.00970153 |
| ADCYAP1      | 4.88126587 | -4.93331106  | 1.65115745 | -2.9877896  | 0.00281003 | 0.03245342 |
| OR2M1P       | 7.83638527 | -4.920463359 | 1.32473913 | -3.71428853 | 0.00020378 | 0.00577446 |
| SYN2         | 888.867487 | -4.903648527 | 1.10629391 | -4.43250071 | 9.31E-06   | 0.00065044 |
| PAPL         | 3.43664594 | -4.897890877 | 1.51249129 | -3.2382936  | 0.00120247 | 0.01842218 |
| ADTRP        | 9.54942788 | -4.880918304 | 1.10655724 | -4.41090451 | 1.03E-05   | 0.00068916 |
| PAQR8        | 49.1330666 | -4.871586473 | 0.81740064 | -5.95985155 | 2.52E-09   | 1.93E-06   |
| NEFL         | 395.48582  | -4.867272695 | 1.61102665 | -3.0212242  | 0.00251755 | 0.03035696 |
| PCDHA6       | 4.59709281 | -4.859244588 | 1.44458902 | -3.36375572 | 0.0007689  | 0.01367251 |
| ANO3         | 23.478427  | -4.856055481 | 1.23165915 | -3.94269426 | 8.06E-05   | 0.00296263 |
| KCTD16       | 183.627213 | -4.84439009  | 0.78373803 | -6.18113439 | 6.36E-10   | 8.63E-07   |
| LOC100507140 | 9.01903681 | -4.843858147 | 1.17606063 | -4.11871466 | 3.81E-05   | 0.00178549 |
| GRIP1        | 7.63134095 | -4.839414453 | 1.18123734 | -4.0969027  | 4.19E-05   | 0.00191198 |
| THEMIS       | 9.14512712 | -4.833790492 | 1.08003776 | -4.47557544 | 7.62E-06   | 0.00056165 |
| WIF1         | 158.502145 | -4.822784591 | 1.71104883 | -2.81861307 | 0.00482316 | 0.04673019 |
| RGS4         | 31.8288421 | -4.808062271 | 1.25507742 | -3.83088898 | 0.00012768 | 0.0041024  |
| FAM19A1      | 105.416394 | -4.783830391 | 1.05772631 | -4.5227488  | 6.10E-06   | 0.00048268 |
| B3GALT2      | 51.9446091 | -4.775768216 | 1.01289629 | -4.7149627  | 2.42E-06   | 0.00027772 |
| OR2T12       | 20.4317868 | -4.765339425 | 1.36006483 | -3.50375902 | 0.00045874 | 0.00983249 |
| GUSBP10      | 4.22039736 | -4.756348466 | 1.49308115 | -3.18559274 | 0.00144458 | 0.02093197 |
| FAM19A2      | 131.665114 | -4.748754364 | 0.83098988 | -5.71457546 | 1.10E-08   | 6.37E-06   |
| SULT4A1      | 342.791606 | -4.74150161  | 1.61139263 | -2.94248685 | 0.00325588 | 0.03582956 |
| SLC6A17      | 39.6706874 | -4.740003781 | 1.17297152 | -4.04102206 | 5.32E-05   | 0.00226402 |
| CDH7         | 21.3943172 | -4.738110861 | 1.3291055  | -3.56488695 | 0.00036401 | 0.00848388 |
| TMEM144      | 242.199402 | -4.723721113 | 0.72534667 | -6.51236342 | 7.40E-11   | 1.78E-07   |
| CADPS        | 102.21134  | -4.723416442 | 1.00656212 | -4.69262289 | 2.70E-06   | 0.00029384 |
| GPR6         | 6.9616913  | -4.721189527 | 1.53433443 | -3.0770277  | 0.00209076 | 0.02692192 |
| SCN2A        | 109.551458 | -4.712696092 | 0.89486078 | -5.26640142 | 1.39E-07   | 4.17E-05   |
| CCL4         | 530.196834 | -4.711838944 | 1.11582676 | -4.22273342 | 2.41E-05   | 0.00131517 |
| SLC6A15      | 51.9126226 | -4.708304859 | 1.17039888 | -4.02282071 | 5.75E-05   | 0.0023801  |
| RAB3B        | 35.1125351 | -4.70009975  | 0.93915254 | -5.00461805 | 5.60E-07   | 0.00010373 |
| LOC389023    | 42.0373779 | -4.685574843 | 1.05919032 | -4.42373268 | 9.70E-06   | 0.00066267 |
| CCK          | 14.264948  | -4.670337722 | 1.33600353 | -3.49575254 | 0.00047273 | 0.00997953 |
| PTGER3       | 7.77279093 | -4.666828456 | 1.52847349 | -3.05326097 | 0.00226369 | 0.02851503 |
| SYT4         | 203.699153 | -4.659912512 | 1.12158557 | -4.15475433 | 3.26E-05   | 0.00160469 |
| LRRC7        | 273.318495 | -4.652272355 | 1.34942779 | -3.44758897 | 0.00056561 | 0.01112319 |
| IFNE         | 4.07914327 | -4.650023894 | 1.34274271 | -3.46307886 | 0.00053403 | 0.01074772 |

|           |            |              |            |             |            |            |
|-----------|------------|--------------|------------|-------------|------------|------------|
| TMEM130   | 42.6118073 | -4.643901592 | 1.08658664 | -4.27384382 | 1.92E-05   | 0.00112103 |
| ABLIM2    | 57.5133171 | -4.64233553  | 1.10811716 | -4.18939052 | 2.80E-05   | 0.00146422 |
| GJB6      | 46.7526701 | -4.639357797 | 1.61368472 | -2.87500882 | 0.00404016 | 0.04159981 |
| SNAP91    | 297.161349 | -4.633929897 | 1.06322396 | -4.35837609 | 1.31E-05   | 0.0008404  |
| SLC22A25  | 2.95257391 | -4.631249525 | 1.39307655 | -3.32447598 | 0.00088585 | 0.01491563 |
| OR2M3     | 6.83747752 | -4.629670968 | 1.24720876 | -3.7120257  | 0.00020561 | 0.00579643 |
| SPOCK3    | 866.461161 | -4.625252127 | 1.48248878 | -3.11992386 | 0.00180898 | 0.02431845 |
| OR14I1    | 11.0043394 | -4.61525068  | 1.53810525 | -3.00060785 | 0.00269441 | 0.03164005 |
| CRHBP     | 50.557735  | -4.611031018 | 0.95352065 | -4.83579568 | 1.33E-06   | 0.00018885 |
| SLC30A3   | 18.3778504 | -4.610013171 | 1.33119011 | -3.46307648 | 0.00053404 | 0.01074772 |
| SLC9A2    | 2.83515504 | -4.587969711 | 1.51659174 | -3.02518443 | 0.00248482 | 0.03013099 |
| GPR12     | 3.84431591 | -4.577106456 | 1.52223566 | -3.00683172 | 0.00263986 | 0.0312705  |
| ERMN      | 14.2049648 | -4.569007117 | 1.31951578 | -3.46263925 | 0.00053491 | 0.01075185 |
| C21orf15  | 7.7350462  | -4.562043326 | 1.47993099 | -3.08260544 | 0.00205197 | 0.0265037  |
| TARP      | 23.1905532 | -4.56039513  | 1.1695726  | -3.89919799 | 9.65E-05   | 0.00334389 |
| NKAIN2    | 120.993761 | -4.559816267 | 1.13619599 | -4.01323038 | 5.99E-05   | 0.00241935 |
| TACR3     | 8.00884868 | -4.558671455 | 1.23074257 | -3.70400078 | 0.00021223 | 0.00594373 |
| MIR490    | 5.8928322  | -4.557365022 | 1.45440175 | -3.13349803 | 0.00172736 | 0.02369516 |
| MYOT      | 11.1754389 | -4.556422118 | 1.14528838 | -3.97840596 | 6.94E-05   | 0.00266783 |
| EHBP1     | 62.7547581 | -4.548588404 | 0.88490355 | -5.14020813 | 2.74E-07   | 6.40E-05   |
| GLS2      | 44.7870556 | -4.54011432  | 1.10368003 | -4.11361464 | 3.90E-05   | 0.00180811 |
| CLTA      | 112.859538 | -4.5388692   | 0.92188892 | -4.92344481 | 8.50E-07   | 0.00013609 |
| PCDHA7    | 4.7893965  | -4.537027286 | 1.51171123 | -3.00125262 | 0.00268871 | 0.03161732 |
| FGF20     | 6.98135005 | -4.534404569 | 1.29109427 | -3.51206312 | 0.00044464 | 0.00970153 |
| OR2L3     | 5.67889826 | -4.528447602 | 1.3310302  | -3.40221252 | 0.00066843 | 0.01245259 |
| NRG4      | 14.8874392 | -4.5150523   | 1.09918355 | -4.1076418  | 4.00E-05   | 0.0018453  |
| TPH2      | 5.11178361 | -4.512430418 | 1.57585937 | -2.86347279 | 0.00419025 | 0.04264865 |
| SLC8A2    | 41.4700054 | -4.511160199 | 1.15079337 | -3.92004361 | 8.85E-05   | 0.00316473 |
| KCNK1     | 100.055454 | -4.507904655 | 1.10587228 | -4.07633388 | 4.58E-05   | 0.00203388 |
| SLC5A11   | 33.6583776 | -4.502665229 | 1.27386866 | -3.53463851 | 0.00040833 | 0.00915117 |
| PABPC1L2A | 22.2955591 | -4.501120189 | 1.22643673 | -3.67007942 | 0.00024248 | 0.00645729 |
| CIDEA     | 8.42770189 | -4.495381788 | 1.41767443 | -3.17095498 | 0.00151939 | 0.02161878 |
| ARHGAP44  | 163.470566 | -4.495059178 | 0.88332301 | -5.08880572 | 3.60E-07   | 7.38E-05   |
| KHDRBS2   | 69.678395  | -4.493091489 | 1.0480956  | -4.28691    | 1.81E-05   | 0.00107579 |
| RIMS2     | 182.743592 | -4.492841192 | 1.39256552 | -3.22630507 | 0.001254   | 0.01901819 |
| PLCXD3    | 15.3676563 | -4.490501576 | 0.98913736 | -4.53981598 | 5.63E-06   | 0.00045269 |
| CKMT1A    | 127.287306 | -4.478603262 | 1.4725461  | -3.04140105 | 0.0023548  | 0.02909563 |
| PDE1A     | 122.271964 | -4.475913337 | 0.97331636 | -4.59862129 | 4.25E-06   | 0.00037568 |
| P2RY12    | 311.181782 | -4.471972212 | 0.85653697 | -5.2209915  | 1.78E-07   | 4.82E-05   |
| MPPED1    | 73.1626512 | -4.468977594 | 1.57246431 | -2.84202164 | 0.00448284 | 0.04446909 |
| WSCD2     | 16.0102123 | -4.461786281 | 1.28096745 | -3.48313791 | 0.00049557 | 0.01030645 |
| CAPN13    | 2.5592254  | -4.458069228 | 1.51699077 | -2.93875831 | 0.0032953  | 0.03602888 |
| NECAB1    | 851.957341 | -4.440098818 | 0.94787852 | -4.68424878 | 2.81E-06   | 0.00029884 |
| CALB1     | 26.4840512 | -4.425011194 | 1.15188333 | -3.84154461 | 0.00012226 | 0.00396644 |
| HMGCLL1   | 64.7550436 | -4.41890975  | 1.52572114 | -2.89627616 | 0.0037762  | 0.03947982 |
| STXBP6    | 94.2819921 | -4.415625931 | 0.77101282 | -5.72704605 | 1.02E-08   | 6.13E-06   |
| MTUS2     | 13.1328815 | -4.385694829 | 1.30647017 | -3.35690392 | 0.0007882  | 0.0138546  |
| VAMP1     | 83.3367631 | -4.382849198 | 0.95943752 | -4.56814448 | 4.92E-06   | 0.00041137 |

|              |            |              |            |             |            |            |
|--------------|------------|--------------|------------|-------------|------------|------------|
| LOC100189589 | 27.8856987 | -4.378598903 | 0.97591865 | -4.48664334 | 7.24E-06   | 0.00054278 |
| RGS7BP       | 246.959565 | -4.378377648 | 0.9339654  | -4.68794415 | 2.76E-06   | 0.00029549 |
| CNTN4        | 51.4945648 | -4.377536535 | 0.91842533 | -4.76634997 | 1.88E-06   | 0.00023351 |
| LDB3         | 34.5511788 | -4.374462728 | 1.02599425 | -4.26363281 | 2.01E-05   | 0.00116144 |
| AKR1C2       | 17.7216946 | -4.372753701 | 1.24657862 | -3.50780419 | 0.00045182 | 0.00977144 |
| HTR1A        | 21.4916972 | -4.342715726 | 1.23942207 | -3.50382315 | 0.00045863 | 0.00983249 |
| CPXM2        | 51.7889748 | -4.326070051 | 1.024433   | -4.22289211 | 2.41E-05   | 0.00131517 |
| CNTNAP4      | 427.005533 | -4.318196184 | 1.38879604 | -3.10930912 | 0.00187525 | 0.0249302  |
| EDIL3        | 706.892141 | -4.313204369 | 0.85703808 | -5.03268698 | 4.84E-07   | 9.34E-05   |
| SNRPN        | 128.081118 | -4.306940651 | 1.37667977 | -3.12849853 | 0.00175702 | 0.02394562 |
| ANO4         | 198.87308  | -4.3019675   | 0.82704667 | -5.20160186 | 1.98E-07   | 5.11E-05   |
| AK5          | 680.250534 | -4.291087405 | 1.05359668 | -4.07279892 | 4.65E-05   | 0.00204701 |
| CABP1        | 309.36904  | -4.280706294 | 1.09615175 | -3.90521322 | 9.41E-05   | 0.00328891 |
| MCF2         | 9.80304054 | -4.268424165 | 1.17506556 | -3.63249874 | 0.00028069 | 0.00716826 |
| IL12RB2      | 5.43821428 | -4.261057437 | 1.27407197 | -3.34444013 | 0.00082449 | 0.0142669  |
| OR2T33       | 13.0223934 | -4.251748403 | 1.01716966 | -4.17997957 | 2.92E-05   | 0.00149563 |
| LOC286186    | 9.02770324 | -4.245688767 | 1.00422186 | -4.22783942 | 2.36E-05   | 0.00130422 |
| DYDC2        | 8.29286006 | -4.244460395 | 1.10094788 | -3.85527825 | 0.0001156  | 0.00384655 |
| FXVD7        | 26.7014545 | -4.237474786 | 1.0402045  | -4.07369396 | 4.63E-05   | 0.00204701 |
| CACNG2       | 23.8275581 | -4.232789623 | 1.20681149 | -3.50741576 | 0.00045248 | 0.00977314 |
| QRFPR        | 8.15584286 | -4.230116859 | 1.17934126 | -3.58684717 | 0.0003347  | 0.00804622 |
| CNNM1        | 40.8049606 | -4.22962196  | 1.20490107 | -3.5103479  | 0.00044752 | 0.00972851 |
| MDGA2        | 34.1671174 | -4.228133466 | 1.05238499 | -4.01766799 | 5.88E-05   | 0.0023973  |
| AMY2A        | 5.0920903  | -4.222316287 | 1.32491426 | -3.18686003 | 0.00143826 | 0.02087097 |
| ANK2         | 488.303182 | -4.196939945 | 0.83827615 | -5.00663172 | 5.54E-07   | 0.00010373 |
| RBM11        | 18.4196886 | -4.185592057 | 1.25776263 | -3.32780761 | 0.00087532 | 0.01480393 |
| CHD5         | 58.6916894 | -4.181988097 | 1.13609568 | -3.68101752 | 0.00023231 | 0.00628608 |
| DPP10        | 124.754759 | -4.179017882 | 0.88297371 | -4.73289051 | 2.21E-06   | 0.00026312 |
| NDST3        | 9.8984347  | -4.175716615 | 1.16089598 | -3.59697742 | 0.00032194 | 0.00788368 |
| TMEM244      | 2.11667606 | -4.159115474 | 1.42985148 | -2.90877447 | 0.00362849 | 0.03841751 |
| ZNF98        | 23.543702  | -4.158224771 | 1.16852329 | -3.55852964 | 0.00037294 | 0.00860828 |
| ASB2         | 15.3918073 | -4.156946942 | 1.01157437 | -4.1093834  | 3.97E-05   | 0.00183648 |
| RASGRF1      | 158.536514 | -4.149582329 | 1.10889512 | -3.7420873  | 0.0001825  | 0.00530571 |
| C4orf37      | 31.1411491 | -4.148903993 | 0.87704461 | -4.73055069 | 2.24E-06   | 0.00026312 |
| IPCEF1       | 112.193686 | -4.143915976 | 0.65199456 | -6.35575243 | 2.07E-10   | 3.19E-07   |
| AMPH         | 70.2753253 | -4.136374478 | 0.99090247 | -4.17435077 | 2.99E-05   | 0.00152171 |
| TLL1         | 17.1172309 | -4.127358288 | 0.99888115 | -4.13198136 | 3.60E-05   | 0.0017122  |
| MADD         | 259.337026 | -4.123047804 | 1.00779405 | -4.0911611  | 4.29E-05   | 0.00195463 |
| ANKRD18A     | 43.2887797 | -4.119646819 | 1.2721816  | -3.23825373 | 0.00120264 | 0.01842218 |
| IL1RAPL1     | 84.0045543 | -4.110513332 | 0.86833481 | -4.73378851 | 2.20E-06   | 0.00026312 |
| LRP2         | 188.46981  | -4.101855717 | 1.08249998 | -3.78924323 | 0.00015111 | 0.00461673 |
| HBQ1         | 2.02202076 | -4.10148037  | 1.41810926 | -2.89221747 | 0.00382533 | 0.03977776 |
| RASGRF2      | 146.375492 | -4.095196805 | 0.70772514 | -5.78642272 | 7.19E-09   | 5.03E-06   |
| NLRP4        | 8.35978594 | -4.092697221 | 1.187274   | -3.44713792 | 0.00056656 | 0.01112319 |
| WBP2NL       | 8.96186863 | -4.091094846 | 0.97797079 | -4.18324851 | 2.87E-05   | 0.00148585 |
| OR5AK4P      | 6.18109278 | -4.089021352 | 1.45732403 | -2.80584226 | 0.00501853 | 0.04783398 |
| DACT2        | 3.6417176  | -4.084091902 | 1.35252839 | -3.01959792 | 0.0025311  | 0.03046754 |
| LPPR4        | 214.447672 | -4.082624327 | 0.83202264 | -4.90686686 | 9.25E-07   | 0.00014534 |

|           |            |              |            |             |            |            |
|-----------|------------|--------------|------------|-------------|------------|------------|
| RSPO2     | 34.7562228 | -4.081265889 | 0.98616271 | -4.13853194 | 3.50E-05   | 0.00168136 |
| PEX5L     | 41.3191563 | -4.069126086 | 1.00760333 | -4.03842063 | 5.38E-05   | 0.00227774 |
| AAK1      | 191.889437 | -4.06495656  | 0.74757924 | -5.43749258 | 5.40E-08   | 2.22E-05   |
| ATG13     | 16.9226073 | -4.059691643 | 0.92227875 | -4.40180544 | 1.07E-05   | 0.00071303 |
| ANKRD31   | 2.67331036 | -4.057814066 | 1.21954804 | -3.32730975 | 0.00087689 | 0.01480393 |
| NRG1      | 30.9008165 | -4.057102143 | 1.17223214 | -3.46100573 | 0.00053816 | 0.01079148 |
| PRSS3     | 30.0322422 | -4.044027037 | 0.97293754 | -4.1565125  | 3.23E-05   | 0.0016018  |
| C17orf110 | 3.46825145 | -4.036661127 | 1.31238203 | -3.07582778 | 0.00209919 | 0.02696591 |
| FSTL5     | 6.48845537 | -4.034535895 | 1.34339767 | -3.00323276 | 0.00267128 | 0.03150049 |
| SYN1      | 303.193211 | -4.032547525 | 1.0218679  | -3.94625131 | 7.94E-05   | 0.00293226 |
| MPP7      | 15.5238348 | -4.02839784  | 0.95333467 | -4.2255862  | 2.38E-05   | 0.00131302 |
| SLC8A1    | 107.716051 | -4.020046226 | 0.95210244 | -4.22228331 | 2.42E-05   | 0.00131517 |
| SOWAHA    | 21.1083225 | -4.016058498 | 0.83374784 | -4.81687426 | 1.46E-06   | 0.00019762 |
| INA       | 203.027748 | -4.012190596 | 1.37182624 | -2.92470757 | 0.0034478  | 0.03716282 |
| CCDC85A   | 114.988077 | -3.990730432 | 0.99032585 | -4.02971451 | 5.58E-05   | 0.00233313 |
| SLC7A14   | 15.4241851 | -3.987084804 | 0.9357747  | -4.26073159 | 2.04E-05   | 0.00116859 |
| PIP5K1B   | 36.0356921 | -3.984913405 | 0.75230175 | -5.29696153 | 1.18E-07   | 3.73E-05   |
| OGN       | 2.48425804 | -3.984688485 | 1.42276282 | -2.80066953 | 0.00509967 | 0.04833326 |
| CCL3      | 707.402882 | -3.974614331 | 1.04690324 | -3.7965441  | 0.00014673 | 0.00453236 |
| GNAL      | 89.8643598 | -3.973612847 | 0.82203864 | -4.83385167 | 1.34E-06   | 0.0001891  |
| OR10A5    | 2.57671133 | -3.970232365 | 1.31424781 | -3.02091609 | 0.00252011 | 0.03035696 |
| RASAL1    | 35.4572689 | -3.969310935 | 1.01736471 | -3.90156145 | 9.56E-05   | 0.00332511 |
| SNCG      | 261.423044 | -3.955736372 | 0.94596831 | -4.1816796  | 2.89E-05   | 0.00149155 |
| LILRA4    | 9.11763882 | -3.932242349 | 0.95841196 | -4.10287277 | 4.08E-05   | 0.00186837 |
| GPIHBP1   | 53.8419663 | -3.928643514 | 1.03449249 | -3.79765301 | 0.00014607 | 0.00452045 |
| SLC14A1   | 23.3419758 | -3.918529107 | 1.07065191 | -3.65994686 | 0.00025227 | 0.0066276  |
| GABRD     | 80.2557127 | -3.916979976 | 1.11540258 | -3.5117186  | 0.00044522 | 0.00970153 |
| ANXA3     | 52.5835153 | -3.91389395  | 0.63527196 | -6.1609739  | 7.23E-10   | 8.63E-07   |
| DBC1      | 28.8536787 | -3.911243051 | 0.87050066 | -4.49309604 | 7.02E-06   | 0.00053133 |
| NRGN      | 175.815871 | -3.910517229 | 1.04708133 | -3.73468335 | 0.00018795 | 0.00539887 |
| NAV3      | 131.375731 | -3.901878754 | 0.68773577 | -5.67351436 | 1.40E-08   | 7.84E-06   |
| SH3GL2    | 437.82713  | -3.901382403 | 1.01290342 | -3.85168253 | 0.00011731 | 0.00387396 |
| MGAT4C    | 8.63567884 | -3.891727445 | 1.29626621 | -3.00225942 | 0.00267984 | 0.0315571  |
| TAGLN3    | 697.774041 | -3.886349469 | 0.92666698 | -4.19390088 | 2.74E-05   | 0.00145351 |
| ATRNL1    | 1834.23803 | -3.884811838 | 0.82191682 | -4.72652674 | 2.28E-06   | 0.00026652 |
| HSPA12A   | 206.151021 | -3.881381364 | 0.70556587 | -5.50109003 | 3.77E-08   | 1.78E-05   |
| FAM190A   | 36.9517291 | -3.875332199 | 0.938334   | -4.13001361 | 3.63E-05   | 0.00171705 |
| MYT1L     | 165.191419 | -3.869307592 | 1.35375979 | -2.85819361 | 0.0042606  | 0.04312963 |
| ELAVL2    | 13.3974955 | -3.868135068 | 1.13859956 | -3.39727433 | 0.00068061 | 0.01260961 |
| VSTM2L    | 20.0860356 | -3.867740259 | 1.36004833 | -2.84382561 | 0.00445754 | 0.04432223 |
| GPR83     | 15.4131246 | -3.865452909 | 1.11873199 | -3.45520906 | 0.00054987 | 0.01093486 |
| PRKCB     | 265.206141 | -3.862145727 | 0.82979733 | -4.65432413 | 3.25E-06   | 0.00032904 |
| CLDN16    | 7.1499969  | -3.849413058 | 1.08597353 | -3.54466564 | 0.00039311 | 0.0089389  |
| MFSD4     | 160.060998 | -3.848342336 | 0.85497607 | -4.50111115 | 6.76E-06   | 0.00052107 |
| UGT8      | 599.267177 | -3.845440909 | 1.10164615 | -3.49063165 | 0.00048188 | 0.01014451 |
| CPNE6     | 23.5760482 | -3.837364521 | 1.13478348 | -3.381583   | 0.00072069 | 0.01317484 |
| IFNA13    | 25.7935494 | -3.835741646 | 0.89265189 | -4.29701844 | 1.73E-05   | 0.00104869 |
| RANBP17   | 426.873782 | -3.826945958 | 0.97974087 | -3.90607973 | 9.38E-05   | 0.00328398 |

|             |            |              |            |             |            |            |
|-------------|------------|--------------|------------|-------------|------------|------------|
| AKR1C1      | 32.0047639 | -3.825192717 | 0.88919386 | -4.30186588 | 1.69E-05   | 0.00103117 |
| PIEZO2      | 160.52273  | -3.825181768 | 0.83697785 | -4.57023059 | 4.87E-06   | 0.00040934 |
| OR13C5      | 2.25707709 | -3.819944243 | 1.32876763 | -2.87480231 | 0.00404281 | 0.04160153 |
| IQCJ-SCHIP1 | 15.2794532 | -3.814250559 | 1.30091835 | -2.93196769 | 0.00336822 | 0.03661031 |
| EVI2A       | 832.644041 | -3.810595405 | 0.76722837 | -4.96670292 | 6.81E-07   | 0.00011677 |
| LPAR3       | 6.55572082 | -3.809106738 | 1.22192445 | -3.11730135 | 0.00182515 | 0.02443809 |
| HPSE2       | 14.2735409 | -3.806545468 | 1.17833613 | -3.23044109 | 0.00123599 | 0.01877906 |
| SOWAHB      | 23.5981014 | -3.787965302 | 1.11830685 | -3.38723249 | 0.00070602 | 0.01299439 |
| ATP2B3      | 63.8860625 | -3.785316875 | 1.148514   | -3.2958387  | 0.00098128 | 0.01594728 |
| CAMKV       | 64.4432266 | -3.776237189 | 0.92727887 | -4.07238569 | 4.65E-05   | 0.00204701 |
| DYNC11I1    | 211.054239 | -3.769217492 | 0.82028675 | -4.59499985 | 4.33E-06   | 0.00037875 |
| SCN2B       | 216.43745  | -3.766242841 | 1.02235239 | -3.6838989  | 0.00022969 | 0.00625184 |
| NOXRED1     | 2.11618935 | -3.763682217 | 1.20271717 | -3.1293161  | 0.00175214 | 0.02391788 |
| CORO6       | 47.3142575 | -3.761941317 | 0.6859907  | -5.48395385 | 4.16E-08   | 1.89E-05   |
| ANO5        | 260.009623 | -3.759437865 | 1.02624538 | -3.66329333 | 0.00024899 | 0.00657874 |
| NRSN1       | 170.936935 | -3.757110524 | 0.87796704 | -4.27932981 | 1.87E-05   | 0.00109911 |
| KIAA1045    | 137.65617  | -3.754415277 | 1.06745849 | -3.51715341 | 0.0004362  | 0.00957715 |
| SLC26A8     | 6.27444395 | -3.753688708 | 1.02784547 | -3.65199714 | 0.00026021 | 0.00678967 |
| PRMT8       | 8.19764166 | -3.752905692 | 1.31169167 | -2.86111879 | 0.00422149 | 0.04290604 |
| CEP44       | 28.4234158 | -3.740893111 | 0.8136301  | -4.59778114 | 4.27E-06   | 0.00037568 |
| NAPB        | 526.656599 | -3.740827376 | 0.77732738 | -4.812422   | 1.49E-06   | 0.00020045 |
| CLUL1       | 3.74527513 | -3.740452993 | 1.32833444 | -2.81589701 | 0.00486413 | 0.04697515 |
| CDKL2       | 36.7581708 | -3.739644411 | 0.71289454 | -5.24571895 | 1.56E-07   | 4.38E-05   |
| DLGAP4      | 80.7777359 | -3.733532208 | 1.07274975 | -3.48033845 | 0.00050078 | 0.01036345 |
| UNC80       | 146.4683   | -3.72031528  | 1.10599007 | -3.36378725 | 0.00076881 | 0.01367251 |
| FAIM        | 38.2764258 | -3.713071095 | 0.78832112 | -4.71009974 | 2.48E-06   | 0.00028112 |
| TRIM59      | 58.258524  | -3.710607764 | 0.83207412 | -4.45946784 | 8.22E-06   | 0.00059512 |
| GYG1        | 61.1062801 | -3.709388303 | 0.93576349 | -3.96402331 | 7.37E-05   | 0.00281122 |
| ADARB2      | 18.6279118 | -3.708175123 | 1.15367501 | -3.21422852 | 0.00130796 | 0.01953678 |
| KCNAB1      | 137.401193 | -3.706202143 | 0.77221214 | -4.79946112 | 1.59E-06   | 0.00020886 |
| GAS2        | 87.9650467 | -3.705393705 | 0.78062476 | -4.74670275 | 2.07E-06   | 0.00024996 |
| PAIP2B      | 503.545273 | -3.701761543 | 0.7473296  | -4.95331854 | 7.30E-07   | 0.00012059 |
| NMUR2       | 8.76425446 | -3.700175893 | 1.12031574 | -3.3027974  | 0.00095726 | 0.01564758 |
| STMN2       | 2589.16047 | -3.69189938  | 1.11534895 | -3.31008459 | 0.00093268 | 0.01547159 |
| MURC        | 11.3913219 | -3.689078096 | 0.88674294 | -4.1602565  | 3.18E-05   | 0.00159118 |
| PLD5        | 36.4219103 | -3.688548509 | 0.76673064 | -4.81074878 | 1.50E-06   | 0.00020054 |
| RLTPR       | 57.1039702 | -3.686081452 | 1.02889112 | -3.58257678 | 0.00034022 | 0.00814257 |
| CAMK4       | 575.113944 | -3.684994066 | 0.86672363 | -4.25163677 | 2.12E-05   | 0.0011987  |
| CES4A       | 64.4446304 | -3.684845326 | 0.84239576 | -4.37424486 | 1.22E-05   | 0.00079365 |
| GRM7        | 85.9892409 | -3.684409155 | 0.93073263 | -3.95861179 | 7.54E-05   | 0.00285399 |
| GRM3        | 132.857226 | -3.682759805 | 0.90337185 | -4.07668203 | 4.57E-05   | 0.00203388 |
| PAK7        | 51.1505064 | -3.677411214 | 1.15521539 | -3.18331218 | 0.00145601 | 0.02105569 |
| GRIN2B      | 88.5827156 | -3.677310657 | 1.17278265 | -3.1355432  | 0.00171536 | 0.02360765 |
| ADAMTS19    | 45.4116455 | -3.652116559 | 0.97541177 | -3.74417929 | 0.00018098 | 0.00528915 |
| JPH3        | 121.029808 | -3.65055721  | 1.19693951 | -3.04990952 | 0.0022891  | 0.02864191 |
| SAMD12      | 215.255628 | -3.644408951 | 0.68300273 | -5.33586294 | 9.51E-08   | 3.34E-05   |
| A2MP1       | 3.43544487 | -3.643297937 | 1.23318738 | -2.95437497 | 0.00313303 | 0.03488896 |
| LIN28B      | 3.92007081 | -3.636894665 | 1.2084634  | -3.00951991 | 0.00261661 | 0.03108286 |



|              |            |              |            |             |            |            |
|--------------|------------|--------------|------------|-------------|------------|------------|
| GRIN2A       | 394.832744 | -3.636786659 | 0.82174578 | -4.4256834  | 9.61E-06   | 0.00066024 |
| JAKMIP3      | 174.865181 | -3.625864121 | 0.84579315 | -4.28693959 | 1.81E-05   | 0.00107579 |
| ERBB3        | 214.748663 | -3.619825644 | 0.88788874 | -4.07689103 | 4.56E-05   | 0.00203388 |
| CACNA1B      | 61.1465212 | -3.619035439 | 1.06916602 | -3.38491438 | 0.000712   | 0.01306171 |
| NYAP2        | 21.8798817 | -3.616774946 | 1.26577149 | -2.857368   | 0.0042717  | 0.04316398 |
| ATP10B       | 155.522512 | -3.610284059 | 0.9367172  | -3.85418786 | 0.00011611 | 0.0038561  |
| LINC00460    | 8.91963821 | -3.609742136 | 1.23157961 | -2.93098563 | 0.00337888 | 0.03667879 |
| PPP1R1A      | 17.8941145 | -3.608255648 | 0.94653983 | -3.8120484  | 0.00013782 | 0.00435324 |
| RUNDC3B      | 38.9002476 | -3.608089324 | 0.74439332 | -4.84702005 | 1.25E-06   | 0.00018156 |
| LRFN2        | 19.7777489 | -3.607869417 | 1.01596656 | -3.55116946 | 0.00038352 | 0.00880427 |
| TP53TG5      | 5.80277219 | -3.606495256 | 1.24172763 | -2.90441735 | 0.00367937 | 0.03881242 |
| NFASC        | 63.9625154 | -3.599857928 | 0.84073042 | -4.28182189 | 1.85E-05   | 0.00109296 |
| PTH2R        | 31.7896546 | -3.597628196 | 0.93838812 | -3.83383816 | 0.00012616 | 0.00406126 |
| PARM1        | 152.802257 | -3.596709053 | 0.99004409 | -3.63287765 | 0.00028028 | 0.00716826 |
| MYBPC1       | 99.9947102 | -3.586649562 | 0.70452395 | -5.09088383 | 3.56E-07   | 7.38E-05   |
| AKAP5        | 23.094009  | -3.583928702 | 0.96516838 | -3.71326784 | 0.0002046  | 0.00578256 |
| ELOVL7       | 40.5372532 | -3.583723084 | 0.77534553 | -4.62209808 | 3.80E-06   | 0.00035862 |
| PLP1         | 14455.159  | -3.580480987 | 1.01966455 | -3.51143029 | 0.0004457  | 0.00970153 |
| UNC5A        | 63.9008038 | -3.57350101  | 0.99593811 | -3.58807537 | 0.00033313 | 0.00803713 |
| CD22         | 109.350118 | -3.570180811 | 1.07935579 | -3.30769598 | 0.00094067 | 0.0155275  |
| LOC100287225 | 27.3114929 | -3.568780947 | 1.03744632 | -3.43996684 | 0.00058179 | 0.01130211 |
| CPEB3        | 153.463948 | -3.567460406 | 0.68897377 | -5.1779336  | 2.24E-07   | 5.46E-05   |
| CLVS2        | 127.059815 | -3.567413696 | 0.89085279 | -4.00449294 | 6.22E-05   | 0.00248071 |
| LACC1        | 84.8881979 | -3.563523146 | 0.80742992 | -4.41341478 | 1.02E-05   | 0.00068669 |
| AKR1C3       | 28.4615726 | -3.56298195  | 0.8226098  | -4.33131474 | 1.48E-05   | 0.00092592 |
| SFRP2        | 21.7970275 | -3.560963107 | 0.85782444 | -4.15115602 | 3.31E-05   | 0.00162063 |
| SCN3B        | 155.419203 | -3.556996045 | 0.91765253 | -3.87619055 | 0.0001061  | 0.00359472 |
| KCNMB2       | 11.6626885 | -3.556748289 | 1.21380213 | -2.93025379 | 0.00338685 | 0.03669418 |
| DAB1         | 36.9519299 | -3.556721612 | 0.67295434 | -5.28523465 | 1.26E-07   | 3.91E-05   |
| RTN4RL1      | 14.6663275 | -3.555146737 | 1.19694425 | -2.97018574 | 0.0029762  | 0.03390646 |
| SLITRK1      | 127.127789 | -3.554379679 | 1.09207506 | -3.25470272 | 0.00113511 | 0.01771069 |
| PCLO         | 156.747396 | -3.551652315 | 0.94446725 | -3.76048224 | 0.00016959 | 0.00501712 |
| APOD         | 1370.75824 | -3.544014985 | 0.69842699 | -5.07428127 | 3.89E-07   | 7.78E-05   |
| MLIP         | 53.8895211 | -3.53812679  | 1.11320001 | -3.17833879 | 0.00148122 | 0.02121538 |
| CPNE9        | 23.0068    | -3.533592039 | 1.11615915 | -3.16584963 | 0.00154631 | 0.02183541 |
| AKR1E2       | 18.4256761 | -3.526537759 | 0.92251694 | -3.82273494 | 0.00013198 | 0.00419241 |
| NRG3         | 80.0719556 | -3.510527095 | 1.02262497 | -3.43285876 | 0.00059725 | 0.01153591 |
| C4orf22      | 31.8814995 | -3.505224879 | 1.04874684 | -3.3422984  | 0.00083088 | 0.0143276  |
| CHGB         | 117.659338 | -3.502210462 | 0.83943459 | -4.17210643 | 3.02E-05   | 0.00152753 |
| VSTM2A       | 40.602573  | -3.500568787 | 1.20140088 | -2.91373915 | 0.00357128 | 0.03814501 |
| L1CAM        | 164.036872 | -3.498067762 | 1.07291009 | -3.26035498 | 0.00111273 | 0.01754333 |
| SYT5         | 97.2063552 | -3.490247976 | 1.02037477 | -3.42055497 | 0.00062494 | 0.01189287 |
| SYTL2        | 268.917179 | -3.489921807 | 0.70012254 | -4.98472999 | 6.20E-07   | 0.00011137 |
| VIT          | 7.51372079 | -3.489788506 | 0.98415068 | -3.54599004 | 0.00039114 | 0.00892316 |
| STL          | 3.22804383 | -3.489577618 | 1.19876621 | -2.9109743  | 0.00360304 | 0.03830156 |
| HS3ST4       | 20.8442123 | -3.485769036 | 1.08083739 | -3.22506334 | 0.00125945 | 0.01908349 |
| RELN         | 20.4662303 | -3.485380888 | 1.15042958 | -3.02963427 | 0.0024485  | 0.02987988 |
| PAK3         | 157.340075 | -3.484225274 | 0.95020321 | -3.66682119 | 0.00024558 | 0.00652554 |

|           |            |              |            |             |            |            |
|-----------|------------|--------------|------------|-------------|------------|------------|
| JAKMIP1   | 132.140341 | -3.47113116  | 0.90358025 | -3.84153059 | 0.00012227 | 0.00396644 |
| OR2W3     | 3.18717237 | -3.459726789 | 1.14386652 | -3.02458959 | 0.00248971 | 0.03014419 |
| FAM19A4   | 46.3023905 | -3.457706274 | 1.11470026 | -3.10191574 | 0.00192273 | 0.0254188  |
| TNRC6B    | 55.2906784 | -3.457356163 | 0.93634221 | -3.69240662 | 0.00022214 | 0.00613527 |
| MCTP1     | 51.5063857 | -3.454956634 | 0.78273712 | -4.41394248 | 1.02E-05   | 0.00068669 |
| OPCML     | 181.461902 | -3.454852674 | 0.96145648 | -3.59335315 | 0.00032645 | 0.00794047 |
| DOK6      | 110.953973 | -3.451198012 | 0.98024532 | -3.5207493  | 0.00043033 | 0.0095023  |
| ENPP5     | 82.3811129 | -3.447908271 | 0.79551455 | -4.33418629 | 1.46E-05   | 0.00091732 |
| ZNF831    | 15.1520342 | -3.446825853 | 1.17614479 | -2.93061354 | 0.00338293 | 0.03669418 |
| WBSCR17   | 126.784111 | -3.44052246  | 1.10212607 | -3.12171406 | 0.00179801 | 0.02422922 |
| RIMBP2    | 13.7754758 | -3.436404258 | 1.15845081 | -2.9663791  | 0.00301329 | 0.03410706 |
| CALN1     | 101.634292 | -3.432295528 | 1.03850306 | -3.30504133 | 0.00094962 | 0.01560015 |
| DGKB      | 744.409699 | -3.423570163 | 0.94938209 | -3.60610361 | 0.00031083 | 0.00771517 |
| COL24A1   | 8.22396264 | -3.417511788 | 0.98985826 | -3.45252641 | 0.00055536 | 0.01098611 |
| EPHB6     | 553.033949 | -3.415059512 | 0.96243312 | -3.54836032 | 0.00038764 | 0.0088624  |
| RPS6KA6   | 65.6370591 | -3.413994293 | 0.94272242 | -3.62142051 | 0.00029299 | 0.00738038 |
| KCNH3     | 98.977379  | -3.412307278 | 1.11451716 | -3.06169111 | 0.0022009  | 0.02788228 |
| FAM196B   | 43.0624572 | -3.409675539 | 0.9158518  | -3.72295554 | 0.0001969  | 0.00563676 |
| VIPR1     | 31.8985987 | -3.408121637 | 1.00021071 | -3.40740368 | 0.00065584 | 0.0123064  |
| MORC1     | 7.31665553 | -3.402126662 | 1.0118577  | -3.36225802 | 0.00077308 | 0.01367454 |
| FRK       | 21.962859  | -3.396423856 | 0.84934313 | -3.99888308 | 6.36E-05   | 0.00252227 |
| KLHL32    | 86.86594   | -3.393810333 | 0.92270151 | -3.67812373 | 0.00023496 | 0.00631712 |
| ACBD7     | 148.937358 | -3.38049427  | 0.90583825 | -3.73189613 | 0.00019004 | 0.00544965 |
| C5orf64   | 5.06233121 | -3.367064636 | 1.01782088 | -3.30811119 | 0.00093928 | 0.01551974 |
| ATP8A1    | 827.191477 | -3.365347161 | 0.74696965 | -4.50533321 | 6.63E-06   | 0.00051555 |
| LHX6      | 9.60864686 | -3.363450168 | 1.09648081 | -3.06749571 | 0.00215861 | 0.02750054 |
| SLC22A15  | 94.96357   | -3.360933096 | 0.67165923 | -5.00392602 | 5.62E-07   | 0.00010373 |
| TRAM1L1   | 44.6823237 | -3.357423589 | 1.01641623 | -3.30319753 | 0.00095589 | 0.01564758 |
| AIFM3     | 68.2704682 | -3.356797568 | 1.05214179 | -3.1904422  | 0.00142055 | 0.02073933 |
| FAM178B   | 30.9315803 | -3.356780381 | 0.98050467 | -3.4235231  | 0.00061815 | 0.01181837 |
| DOCK5     | 146.480387 | -3.352127175 | 0.75747357 | -4.42540483 | 9.63E-06   | 0.00066024 |
| FSTL4     | 40.5195638 | -3.349359982 | 1.18452038 | -2.82760858 | 0.00468971 | 0.04566001 |
| RFPL1-AS1 | 7.44260243 | -3.348602543 | 1.04099402 | -3.2167356  | 0.00129658 | 0.01943598 |
| ZNF483    | 1003.76139 | -3.34793125  | 0.63685922 | -5.25694085 | 1.46E-07   | 4.29E-05   |
| DNM3      | 106.503068 | -3.345922115 | 0.57637676 | -5.80509548 | 6.43E-09   | 4.70E-06   |
| ANKRD7    | 7.06073943 | -3.341691105 | 1.08617201 | -3.07657634 | 0.00209393 | 0.02694207 |
| APOB      | 4.51409976 | -3.332464981 | 0.95169037 | -3.5016273  | 0.00046243 | 0.00987371 |
| DDX4      | 2.21093127 | -3.326016693 | 1.14983153 | -2.89261219 | 0.00382053 | 0.03977704 |
| CDS1      | 26.7483984 | -3.319727783 | 0.84666421 | -3.92094972 | 8.82E-05   | 0.00316473 |
| TRIM67    | 8.95274837 | -3.319096081 | 1.10947174 | -2.99160037 | 0.00277519 | 0.03218381 |
| TF        | 2143.15728 | -3.310196279 | 0.85952854 | -3.85117667 | 0.00011755 | 0.00387396 |
| EPHX4     | 23.6158066 | -3.307545048 | 0.8888021  | -3.72135154 | 0.00019816 | 0.00564385 |
| NRIP2     | 15.2706815 | -3.304405013 | 1.0250142  | -3.22376511 | 0.00126517 | 0.01912696 |
| EMBP1     | 4.72874001 | -3.302745421 | 1.09080525 | -3.02780485 | 0.00246337 | 0.03000642 |
| UBE2QL1   | 109.01835  | -3.299372911 | 0.92836666 | -3.55395456 | 0.00037948 | 0.00873543 |
| ENPP4     | 261.168182 | -3.298894396 | 0.84780641 | -3.89109398 | 9.98E-05   | 0.0034293  |
| ATP1B1    | 2838.77381 | -3.294362803 | 0.61831684 | -5.3279526  | 9.93E-08   | 3.34E-05   |
| DNAJC6    | 526.284488 | -3.289381968 | 0.68849275 | -4.77765663 | 1.77E-06   | 0.00022577 |

|           |            |              |            |             |            |            |
|-----------|------------|--------------|------------|-------------|------------|------------|
| SSTR2     | 33.0032896 | -3.287033396 | 0.88869791 | -3.69870724 | 0.0002167  | 0.00602886 |
| SYP       | 240.409659 | -3.28142827  | 0.81923965 | -4.00545586 | 6.19E-05   | 0.00248071 |
| C7orf41   | 5615.99204 | -3.275759762 | 0.76274897 | -4.29467608 | 1.75E-05   | 0.00104994 |
| KIF5A     | 4401.53334 | -3.266901126 | 0.84144046 | -3.88251015 | 0.00010338 | 0.00353102 |
| PGR       | 6.74645064 | -3.256635242 | 1.12321304 | -2.89939229 | 0.00373887 | 0.03921844 |
| SYN3      | 55.8015572 | -3.255360457 | 0.945002   | -3.44481858 | 0.00057144 | 0.01115276 |
| CNTN6     | 22.7055831 | -3.248313347 | 0.85180924 | -3.81342818 | 0.00013705 | 0.00433715 |
| SNCA      | 803.47765  | -3.245368556 | 0.72474473 | -4.47794711 | 7.54E-06   | 0.00055789 |
| TLR8      | 15.1747299 | -3.237178592 | 1.02901261 | -3.14590759 | 0.00165572 | 0.02310861 |
| PIP4K2A   | 504.360228 | -3.234358214 | 0.64807418 | -4.99072224 | 6.02E-07   | 0.00010987 |
| PKP4      | 1539.75163 | -3.233255879 | 0.70301382 | -4.59913559 | 4.24E-06   | 0.00037568 |
| BAI3      | 530.447561 | -3.229184213 | 0.71460868 | -4.51881473 | 6.22E-06   | 0.00048831 |
| CECR7     | 8.9645078  | -3.222050266 | 0.94587886 | -3.40640902 | 0.00065823 | 0.01233108 |
| ASP       | 205.620946 | -3.216246724 | 1.11734197 | -2.87848018 | 0.00399596 | 0.04117348 |
| NEFH      | 89.2683003 | -3.215115169 | 0.956582   | -3.36104503 | 0.00077648 | 0.0136922  |
| HAPLN2    | 417.650298 | -3.210213387 | 1.12663076 | -2.84939262 | 0.00438028 | 0.04383931 |
| ANKS1B    | 53.3391185 | -3.209860259 | 0.97581738 | -3.28940672 | 0.00100399 | 0.01625339 |
| BVES-AS1  | 7.47335003 | -3.207442866 | 1.10470152 | -2.9034475  | 0.00369079 | 0.03888402 |
| PLA1A     | 13.005542  | -3.199816903 | 1.06588083 | -3.00204003 | 0.00268177 | 0.03155774 |
| LOC650226 | 6.06105355 | -3.199081946 | 1.1075149  | -2.88852271 | 0.00387056 | 0.0400992  |
| PLA2G7    | 57.771895  | -3.190875068 | 0.77292701 | -4.12830064 | 3.65E-05   | 0.00172503 |
| TRIM2     | 569.341087 | -3.189719385 | 0.79435152 | -4.0155011  | 5.93E-05   | 0.00240194 |
| IGFL4     | 9.97966134 | -3.181909184 | 0.93262585 | -3.41177461 | 0.00064541 | 0.01219971 |
| ST18      | 255.672315 | -3.178047001 | 1.08661257 | -2.92472874 | 0.00344757 | 0.03716282 |
| EPHA7     | 123.408997 | -3.177803213 | 1.03322076 | -3.0756285  | 0.00210059 | 0.02696591 |
| KIF19     | 75.7767128 | -3.17643231  | 1.12875199 | -2.81411005 | 0.00489125 | 0.04712875 |
| RHBDL2    | 39.1840753 | -3.172407813 | 0.6939601  | -4.57145567 | 4.84E-06   | 0.00040899 |
| SGIP1     | 347.23813  | -3.168366287 | 0.62081787 | -5.10353593 | 3.33E-07   | 7.14E-05   |
| RANBP3L   | 93.7340017 | -3.16514094  | 0.61335246 | -5.16039494 | 2.46E-07   | 5.92E-05   |
| TMEM56    | 99.7055991 | -3.155558963 | 0.61847008 | -5.1022015  | 3.36E-07   | 7.14E-05   |
| MAL       | 520.424238 | -3.152650357 | 0.97535261 | -3.23231857 | 0.0012279  | 0.0186899  |
| OTOGL     | 7.76914583 | -3.145041536 | 1.05647091 | -2.9769315  | 0.00291149 | 0.03348712 |
| ZNF488    | 63.6531353 | -3.144908763 | 1.04860881 | -2.99912487 | 0.00270756 | 0.0317501  |
| NMNAT2    | 316.168901 | -3.141508563 | 0.90251012 | -3.48085688 | 0.00049981 | 0.01035616 |
| C14orf162 | 20.8957448 | -3.133104736 | 0.90585634 | -3.45872144 | 0.00054275 | 0.01084471 |
| LOC79015  | 12.3657749 | -3.130889925 | 0.81297963 | -3.8511296  | 0.00011757 | 0.00387396 |
| RIMS3     | 111.770706 | -3.124315758 | 0.86199321 | -3.6245248  | 0.00028949 | 0.00732627 |
| PRKCZ     | 153.928181 | -3.11766043  | 0.85863506 | -3.63094937 | 0.00028238 | 0.00720049 |
| STXBP5L   | 233.681465 | -3.114203385 | 0.89498078 | -3.47963156 | 0.0005021  | 0.01037805 |
| HHATL     | 169.164846 | -3.113205185 | 0.93922272 | -3.31466127 | 0.00091754 | 0.01528085 |
| SEPP1     | 3079.33702 | -3.102381748 | 0.78431688 | -3.95552082 | 7.64E-05   | 0.00287089 |
| LOC255167 | 10.9912268 | -3.09765862  | 1.0751044  | -2.88126309 | 0.00396085 | 0.04088336 |
| NRIP3     | 57.6095748 | -3.093503789 | 0.86229703 | -3.58751531 | 0.00033384 | 0.00803713 |
| CACNA1A   | 61.6007627 | -3.087053846 | 0.67293801 | -4.58742678 | 4.49E-06   | 0.00038639 |
| LGI1      | 227.042564 | -3.085670896 | 0.79521224 | -3.88031113 | 0.00010432 | 0.00354867 |
| ALDH1A1   | 211.330532 | -3.080028263 | 0.66744107 | -4.61468195 | 3.94E-06   | 0.00036551 |
| DGKI      | 140.289645 | -3.079619791 | 0.74003193 | -4.16146879 | 3.16E-05   | 0.00159088 |
| PDE1C     | 14.9954319 | -3.079097493 | 0.88413025 | -3.48262881 | 0.00049652 | 0.0103133  |

|           |            |              |            |             |            |            |
|-----------|------------|--------------|------------|-------------|------------|------------|
| BSN       | 190.593591 | -3.078946326 | 1.0124914  | -3.04096048 | 0.00235825 | 0.02911682 |
| ANLN      | 2265.86063 | -3.076512344 | 0.72352702 | -4.25210429 | 2.12E-05   | 0.0011987  |
| C10orf90  | 45.463584  | -3.075545109 | 0.83046937 | -3.70338174 | 0.00021274 | 0.00594835 |
| KIF2A     | 99.2286152 | -3.069293472 | 0.92655242 | -3.31259561 | 0.00092435 | 0.01537891 |
| GUCY1B3   | 228.799647 | -3.068231637 | 0.63508457 | -4.8312174  | 1.36E-06   | 0.00019003 |
| CLDND1    | 2974.77373 | -3.064580623 | 0.63568288 | -4.82092676 | 1.43E-06   | 0.00019522 |
| KIAA1324L | 272.409999 | -3.055495442 | 0.67191213 | -4.54746284 | 5.43E-06   | 0.00044339 |
| RCAN2     | 271.938924 | -3.050991008 | 0.83463272 | -3.65548934 | 0.00025669 | 0.00672925 |
| CYP4X1    | 66.9548223 | -3.050302751 | 0.97738052 | -3.12089578 | 0.00180302 | 0.02427718 |
| CPEB1     | 76.8471352 | -3.042843269 | 0.84426426 | -3.60413608 | 0.00031319 | 0.00774392 |
| FBXL16    | 559.360562 | -3.041274859 | 1.05259184 | -2.88932018 | 0.00386076 | 0.04007175 |
| TM6SF1    | 51.9685904 | -3.037344012 | 0.95242281 | -3.18907105 | 0.00142731 | 0.02078378 |
| CTNNA3    | 223.771178 | -3.02613494  | 0.86506797 | -3.498147   | 0.0004685  | 0.00991527 |
| NPTN      | 38.2876625 | -3.023181767 | 1.02024931 | -2.96317943 | 0.00304479 | 0.03431566 |
| LGI4      | 79.7073971 | -3.023125109 | 0.72140881 | -4.19058521 | 2.78E-05   | 0.00146129 |
| MATK      | 83.1468915 | -3.020855658 | 0.94237402 | -3.20558037 | 0.0013479  | 0.01993854 |
| MYH11     | 45.2850206 | -3.015178404 | 0.79614857 | -3.78720572 | 0.00015235 | 0.00464629 |
| 4-Sep     | 183.0944   | -3.008833428 | 0.87927312 | -3.42195543 | 0.00062173 | 0.01185324 |
| BCAS1     | 4204.47933 | -3.008586809 | 0.93936836 | -3.20277641 | 0.0013611  | 0.02009829 |
| PRRG1     | 103.752074 | -3.006709521 | 0.64591266 | -4.65497849 | 3.24E-06   | 0.00032904 |
| PLCL1     | 436.567048 | -2.99946909  | 0.83811032 | -3.57884759 | 0.00034511 | 0.00819106 |
| RBP7      | 111.702701 | -2.994815297 | 0.74345689 | -4.0282299  | 5.62E-05   | 0.00233391 |
| CLEC9A    | 49.5669353 | -2.991973321 | 0.84753684 | -3.53019856 | 0.00041525 | 0.00922993 |
| LRMP      | 76.851821  | -2.985592895 | 0.65037995 | -4.59053647 | 4.42E-06   | 0.00038493 |
| STOX1     | 38.027086  | -2.976214419 | 0.64905429 | -4.58546299 | 4.53E-06   | 0.00038639 |
| SLC24A2   | 476.02039  | -2.975479351 | 0.94706998 | -3.14177349 | 0.00167928 | 0.02332537 |
| EXTL1     | 8.99022644 | -2.970073443 | 1.05440696 | -2.81681889 | 0.00485019 | 0.04689444 |
| CCNB3     | 9.61770193 | -2.968668602 | 0.85053131 | -3.49036956 | 0.00048235 | 0.01014451 |
| DOC2A     | 38.6408756 | -2.961871882 | 0.84651062 | -3.49891875 | 0.00046715 | 0.00991158 |
| REPS2     | 228.612034 | -2.958506419 | 0.8122956  | -3.64215491 | 0.00027037 | 0.00698957 |
| KIF5C     | 1061.66572 | -2.957677166 | 0.73552894 | -4.02115674 | 5.79E-05   | 0.00238832 |
| USP17     | 477.229408 | -2.954899064 | 0.81205252 | -3.63880291 | 0.00027391 | 0.0070656  |
| MIAT      | 108.554009 | -2.954768877 | 0.92376261 | -3.1986236  | 0.00138085 | 0.02030084 |
| TUBA4A    | 312.034015 | -2.949526628 | 0.8094588  | -3.64382553 | 0.00026862 | 0.00696576 |
| ENC1      | 1148.99547 | -2.933291012 | 0.77393192 | -3.79011504 | 0.00015058 | 0.00460893 |
| JPH4      | 136.323787 | -2.929350453 | 1.04619539 | -2.8000032  | 0.00511021 | 0.04835133 |
| SLC39A12  | 31.899043  | -2.924102723 | 0.78782236 | -3.71162697 | 0.00020593 | 0.00579643 |
| KCNH8     | 180.726269 | -2.924085419 | 0.79187789 | -3.69259637 | 0.00022198 | 0.00613527 |
| CCT6B     | 10.2580352 | -2.921993806 | 0.90779798 | -3.21877101 | 0.00128741 | 0.01935034 |
| DGKE      | 62.6985983 | -2.918102622 | 0.6217432  | -4.69342103 | 2.69E-06   | 0.00029384 |
| LOC150622 | 208.564215 | -2.910285034 | 0.8416604  | -3.45779015 | 0.00054463 | 0.01086922 |
| CA1       | 15.1345833 | -2.909853317 | 0.99643395 | -2.92026715 | 0.00349731 | 0.03760005 |
| OR9A2     | 43.2367897 | -2.905446531 | 0.69333238 | -4.19055362 | 2.78E-05   | 0.00146129 |
| MAPK8     | 31.6834958 | -2.904807189 | 0.96323307 | -3.01568467 | 0.002564   | 0.03079725 |
| HLF       | 230.781679 | -2.902497909 | 0.85882731 | -3.37960596 | 0.0007259  | 0.01321356 |
| PICALM    | 72.9639846 | -2.900653479 | 0.55999413 | -5.17979265 | 2.22E-07   | 5.46E-05   |
| STEAP4    | 17.8100931 | -2.899560633 | 0.86110786 | -3.3672444  | 0.00075923 | 0.01360145 |
| GPR15     | 6.62047775 | -2.898744886 | 0.83090242 | -3.48867067 | 0.00048543 | 0.01019643 |

|           |            |              |            |             |            |            |
|-----------|------------|--------------|------------|-------------|------------|------------|
| FUT9      | 74.5462075 | -2.896113092 | 0.73501129 | -3.94022941 | 8.14E-05   | 0.00296817 |
| FAM162B   | 34.5511303 | -2.895735548 | 0.70311515 | -4.11843714 | 3.81E-05   | 0.00178549 |
| NBEAP1    | 9.27970874 | -2.895681894 | 0.95344382 | -3.03707659 | 0.00238885 | 0.0294082  |
| PRDM8     | 137.58245  | -2.891737507 | 0.75983326 | -3.80575271 | 0.00014137 | 0.0044075  |
| ADCY1     | 143.764844 | -2.891316239 | 0.89691021 | -3.22364067 | 0.00126572 | 0.01912696 |
| TM7SF4    | 8.57622969 | -2.887993389 | 0.94312898 | -3.06214043 | 0.0021976  | 0.02788228 |
| TAS2R39   | 74.1519756 | -2.886511693 | 0.67806349 | -4.25699321 | 2.07E-05   | 0.00118425 |
| CYP2J2    | 73.9161046 | -2.886461905 | 0.64322895 | -4.48745645 | 7.21E-06   | 0.00054278 |
| PPP1R16B  | 340.60854  | -2.880533001 | 0.91686478 | -3.14172062 | 0.00167958 | 0.02332537 |
| PDE1B     | 150.593147 | -2.880214663 | 0.7200771  | -3.99986981 | 6.34E-05   | 0.00251771 |
| LAMP5     | 98.3277813 | -2.880124252 | 0.84223121 | -3.41963609 | 0.00062705 | 0.01191962 |
| PLLP      | 324.597728 | -2.879166293 | 0.8014203  | -3.59257971 | 0.00032742 | 0.00795083 |
| ENPP2     | 326.537119 | -2.873944615 | 0.88711135 | -3.23966614 | 0.0011967  | 0.01838144 |
| C1orf173  | 23.2829725 | -2.865261146 | 0.7540193  | -3.79998383 | 0.00014471 | 0.00448641 |
| FAM81A    | 102.77476  | -2.861374042 | 0.76935137 | -3.71920315 | 0.00019985 | 0.00567283 |
| FMN1      | 251.622866 | -2.861041091 | 0.64464721 | -4.43815011 | 9.07E-06   | 0.00064064 |
| TMEM191A  | 4.65959092 | -2.855830031 | 0.86276007 | -3.31010918 | 0.0009326  | 0.01547159 |
| C21orf91  | 309.216753 | -2.855446143 | 0.79838092 | -3.57654607 | 0.00034816 | 0.00824021 |
| PCDH7     | 130.021418 | -2.851689206 | 0.88475343 | -3.22314569 | 0.00126791 | 0.01914283 |
| CCDC91    | 611.583074 | -2.849228758 | 0.68665942 | -4.14940607 | 3.33E-05   | 0.00162832 |
| PDE2A     | 311.44461  | -2.845038499 | 0.8066284  | -3.52707455 | 0.00042018 | 0.00932718 |
| FABP3     | 383.19347  | -2.843166561 | 0.65710027 | -4.32683824 | 1.51E-05   | 0.00094143 |
| GSTO2     | 19.7888778 | -2.837759722 | 0.61484158 | -4.61543234 | 3.92E-06   | 0.00036551 |
| CLDN11    | 528.138823 | -2.834126227 | 0.85665575 | -3.30836073 | 0.00093844 | 0.01551974 |
| CADPS2    | 289.633332 | -2.828966738 | 0.72104561 | -3.92342272 | 8.73E-05   | 0.0031413  |
| HMSD      | 17.9528387 | -2.827313666 | 0.9580159  | -2.9512179  | 0.00316524 | 0.0351544  |
| LOC729080 | 5.8504002  | -2.82533813  | 0.86391909 | -3.27037353 | 0.00107406 | 0.01712375 |
| CRHR1     | 78.0297209 | -2.823443312 | 0.99668397 | -2.8328371  | 0.00461369 | 0.0451976  |
| AFF2      | 35.4256765 | -2.822025053 | 0.94256256 | -2.99399232 | 0.00275353 | 0.03197671 |
| RAB11FIP4 | 236.806723 | -2.820954546 | 0.83688717 | -3.37077044 | 0.00074958 | 0.01351728 |
| DDX25     | 26.8515249 | -2.819854027 | 0.78698666 | -3.58310269 | 0.00033954 | 0.0081392  |
| ADAMTSL3  | 40.7957401 | -2.818820359 | 0.67299063 | -4.18849869 | 2.81E-05   | 0.00146542 |
| S100A1    | 1555.19619 | -2.812965055 | 0.7959226  | -3.53421936 | 0.00040898 | 0.00915117 |
| C9orf4    | 509.629637 | -2.811138111 | 0.73223948 | -3.83909662 | 0.00012349 | 0.00399825 |
| CACNA2D1  | 368.95148  | -2.811114323 | 0.76379996 | -3.68043267 | 0.00023284 | 0.00629038 |
| ATP2B2    | 351.184872 | -2.805548287 | 0.86374519 | -3.2481203  | 0.0011617  | 0.01792583 |
| EVI2B     | 29.749699  | -2.804793318 | 0.8077902  | -3.47218044 | 0.00051625 | 0.01054077 |
| LINC00032 | 9.64507782 | -2.804377822 | 0.73704984 | -3.80486863 | 0.00014188 | 0.00441508 |
| NEBL      | 85.9265009 | -2.804308047 | 0.69219159 | -4.05134663 | 5.09E-05   | 0.00219416 |
| CACNA2D3  | 125.632535 | -2.801383081 | 0.95008407 | -2.94856335 | 0.00319255 | 0.03534095 |
| BIN1      | 102.259498 | -2.800547986 | 0.83481769 | -3.35468212 | 0.00079456 | 0.01389169 |
| TUBA8     | 188.964173 | -2.800437013 | 0.82949605 | -3.37607032 | 0.00073529 | 0.01332884 |
| CYP7B1    | 49.5015295 | -2.799600287 | 0.87190341 | -3.21090646 | 0.00132317 | 0.01966384 |
| KEL       | 29.6650745 | -2.797584463 | 0.68780178 | -4.06742833 | 4.75E-05   | 0.00206937 |
| GSTM5     | 29.5494294 | -2.790238517 | 0.81543699 | -3.42177086 | 0.00062215 | 0.01185324 |
| P2RY13    | 208.503967 | -2.784659055 | 0.77058109 | -3.61371319 | 0.00030184 | 0.00753666 |
| RERG      | 20.387917  | -2.77943946  | 0.70893873 | -3.9205637  | 8.83E-05   | 0.00316473 |
| FLRT2     | 21.9806271 | -2.774399192 | 0.85441484 | -3.24713367 | 0.00116574 | 0.01797159 |

|              |            |              |            |             |            |            |
|--------------|------------|--------------|------------|-------------|------------|------------|
| RAB3A        | 854.895352 | -2.7707433   | 0.85552452 | -3.23864861 | 0.00120097 | 0.01842218 |
| SIDT1        | 47.8349024 | -2.770633574 | 0.79032902 | -3.50567104 | 0.00045546 | 0.00979963 |
| ACER2        | 159.069286 | -2.768021821 | 0.6243816  | -4.43322132 | 9.28E-06   | 0.00065044 |
| SYT15        | 42.570087  | -2.757016195 | 0.70535374 | -3.90870007 | 9.28E-05   | 0.00325535 |
| CPM          | 215.34324  | -2.751596173 | 0.78881185 | -3.48827948 | 0.00048614 | 0.01019861 |
| FAM188A      | 743.595194 | -2.751132487 | 0.59467492 | -4.62627966 | 3.72E-06   | 0.00035545 |
| CNTN1        | 363.362106 | -2.750005464 | 0.69378624 | -3.96376479 | 7.38E-05   | 0.00281122 |
| NCALD        | 205.93273  | -2.750002578 | 0.76654586 | -3.5875252  | 0.00033383 | 0.00803713 |
| NALCN        | 127.080863 | -2.749161379 | 0.89743403 | -3.06335763 | 0.00218868 | 0.02781458 |
| EPB49        | 157.119626 | -2.74781397  | 0.77051851 | -3.56618814 | 0.00036221 | 0.00846537 |
| ENTPD3       | 46.2674473 | -2.747679875 | 0.96740918 | -2.84024582 | 0.00450788 | 0.04461153 |
| PCDHA13      | 4.88321756 | -2.745654563 | 0.8590088  | -3.1963055  | 0.001392   | 0.02044677 |
| SLC25A16     | 358.474141 | -2.744897543 | 0.60644452 | -4.5262138  | 6.00E-06   | 0.00047824 |
| MAP3K9       | 107.176628 | -2.744792031 | 0.98382781 | -2.789911   | 0.00527225 | 0.04932903 |
| TMEM171      | 9.12553852 | -2.742733614 | 0.90118619 | -3.04347053 | 0.00233866 | 0.02900288 |
| ABCB1        | 41.9563407 | -2.736271618 | 0.87160573 | -3.13934561 | 0.00169326 | 0.02344707 |
| LOC100129794 | 12.4294819 | -2.733726193 | 0.81536217 | -3.35277534 | 0.00080006 | 0.01394621 |
| FBXO2        | 75.9205649 | -2.730951091 | 0.72510536 | -3.76628178 | 0.0001657  | 0.00493437 |
| PRR18        | 39.7667532 | -2.730186348 | 0.72989961 | -3.74049571 | 0.00018366 | 0.00532315 |
| RBP4         | 80.0913698 | -2.729593242 | 0.87025627 | -3.13653959 | 0.00170954 | 0.02360385 |
| NT5DC1       | 92.2467026 | -2.727035455 | 0.61415677 | -4.44029212 | 8.98E-06   | 0.00063851 |
| FGF12        | 111.402594 | -2.726155949 | 0.89515098 | -3.04547053 | 0.00232317 | 0.02888055 |
| SLC45A3      | 20.151773  | -2.723557335 | 0.89954665 | -3.02769994 | 0.00246423 | 0.03000642 |
| MAN2A1       | 1517.46311 | -2.721928704 | 0.65497076 | -4.15580185 | 3.24E-05   | 0.00160206 |
| EPB41L4B     | 25.5555308 | -2.718411204 | 0.86980955 | -3.12529472 | 0.00177627 | 0.02405193 |
| AKD1         | 13.0036321 | -2.718132791 | 0.57918078 | -4.69306454 | 2.69E-06   | 0.00029384 |
| FAM13C       | 177.395538 | -2.715627472 | 0.67616918 | -4.01619529 | 5.91E-05   | 0.00240067 |
| KCNA6        | 94.1754334 | -2.713515073 | 0.56765905 | -4.78018467 | 1.75E-06   | 0.00022465 |
| CXorf1       | 24.2140799 | -2.709976026 | 0.89578807 | -3.02524236 | 0.00248434 | 0.03013099 |
| EPCAM        | 19.5749134 | -2.705742241 | 0.61368334 | -4.40902021 | 1.04E-05   | 0.00069243 |
| RERGL        | 37.4946539 | -2.705031132 | 0.88758807 | -3.04761999 | 0.00230661 | 0.02875397 |
| GABBR1       | 612.447876 | -2.704217195 | 0.80580717 | -3.35591105 | 0.00079104 | 0.01387645 |
| FAM108B1     | 18.7782439 | -2.699467811 | 0.8512402  | -3.1712175  | 0.00151801 | 0.02161755 |
| RUNDC3A      | 551.386445 | -2.697777637 | 0.87888559 | -3.06954358 | 0.00214386 | 0.02739577 |
| TMEM35       | 67.093784  | -2.695012485 | 0.71313006 | -3.77913179 | 0.00015738 | 0.00476495 |
| FOSB         | 134.907491 | -2.69430567  | 0.95406489 | -2.8240277  | 0.00474243 | 0.04606461 |
| TMTC4        | 113.673533 | -2.693219601 | 0.56926524 | -4.73104519 | 2.23E-06   | 0.00026312 |
| GALNT14      | 32.9739771 | -2.692449446 | 0.74981183 | -3.5908335  | 0.00032962 | 0.00799274 |
| TCEAL6       | 116.248194 | -2.689689992 | 0.94951109 | -2.83271044 | 0.00461552 | 0.0451976  |
| PAR1         | 158.204216 | -2.689046098 | 0.92972912 | -2.89228985 | 0.00382445 | 0.03977776 |
| ZNF702P      | 18.5748011 | -2.688676909 | 0.79752249 | -3.37128662 | 0.00074818 | 0.01351728 |
| ATL1         | 492.374267 | -2.687102832 | 0.52893136 | -5.08024863 | 3.77E-07   | 7.63E-05   |
| NME9         | 19.6459211 | -2.683668601 | 0.65809765 | -4.07791851 | 4.54E-05   | 0.00203388 |
| ERC2         | 126.398055 | -2.682297517 | 0.79519027 | -3.37315182 | 0.00074313 | 0.01344193 |
| CCDC152      | 42.260502  | -2.67690792  | 0.74886322 | -3.57462864 | 0.00035073 | 0.00828915 |
| DEPDC7       | 19.5473636 | -2.674639125 | 0.88459402 | -3.02357812 | 0.00249805 | 0.03022113 |
| BTBD10       | 462.363818 | -2.670407671 | 0.5477531  | -4.87520323 | 1.09E-06   | 0.00016455 |
| GFRA1        | 27.0109706 | -2.668091704 | 0.79504736 | -3.35589029 | 0.0007911  | 0.01387645 |

|            |            |              |            |             |            |            |
|------------|------------|--------------|------------|-------------|------------|------------|
| OR6W1P     | 16.4346874 | -2.65719854  | 0.70549157 | -3.76644973 | 0.00016559 | 0.00493437 |
| SLC6A13    | 15.9236762 | -2.654989509 | 0.72890032 | -3.64245896 | 0.00027005 | 0.00698957 |
| TPPP       | 329.959099 | -2.654537377 | 0.90294472 | -2.93986698 | 0.00328353 | 0.03601597 |
| TPD52L1    | 139.152683 | -2.654067467 | 0.72297723 | -3.67102497 | 0.00024158 | 0.00644366 |
| PPM1H      | 88.8025904 | -2.653574638 | 0.62199378 | -4.26623981 | 1.99E-05   | 0.00115191 |
| DAAM2      | 734.133275 | -2.650586091 | 0.67253096 | -3.94121054 | 8.11E-05   | 0.00296817 |
| RAPGEF4    | 1108.97043 | -2.650110137 | 0.80906958 | -3.27550338 | 0.00105474 | 0.01689593 |
| SH3BGR12   | 139.30811  | -2.646063462 | 0.64466019 | -4.10458644 | 4.05E-05   | 0.00185964 |
| DMC1       | 17.3160778 | -2.644407136 | 0.78566709 | -3.36581127 | 0.00076319 | 0.013637   |
| FAIM2      | 774.8003   | -2.642141954 | 0.7842725  | -3.36890806 | 0.00075467 | 0.013563   |
| HOXD-AS1   | 35.3952334 | -2.641094284 | 0.86166911 | -3.06509105 | 0.00217604 | 0.02768065 |
| VWA3A      | 34.6930378 | -2.639867835 | 0.71753808 | -3.67906306 | 0.00023409 | 0.00630681 |
| GAD1       | 211.204652 | -2.639030635 | 0.87014069 | -3.03287809 | 0.00242233 | 0.02965194 |
| IL18       | 210.859398 | -2.632777164 | 0.81717715 | -3.22179489 | 0.0012739  | 0.01921604 |
| QDPR       | 560.73642  | -2.630526774 | 0.53752273 | -4.89379636 | 9.89E-07   | 0.0001511  |
| TXNRD1     | 7.189758   | -2.628625245 | 0.87244023 | -3.01295741 | 0.00258715 | 0.03095989 |
| KIAA0319   | 140.598264 | -2.627010707 | 0.8131747  | -3.23056129 | 0.00123547 | 0.01877906 |
| GLDN       | 312.11731  | -2.625760077 | 0.8720602  | -3.01098489 | 0.00260402 | 0.03104604 |
| SRRM3      | 65.2260428 | -2.624772874 | 0.82568182 | -3.17891568 | 0.00147827 | 0.02121338 |
| TMEM74     | 6.10730123 | -2.616107864 | 0.87022889 | -3.00622961 | 0.00264509 | 0.03127227 |
| ACSL6      | 90.0115982 | -2.615721119 | 0.8167016  | -3.20278683 | 0.00136105 | 0.02009829 |
| AJAP1      | 87.864304  | -2.615046235 | 0.82599401 | -3.16593851 | 0.00154583 | 0.02183541 |
| CACNA1E    | 146.146826 | -2.615010166 | 0.93174128 | -2.80658401 | 0.00500699 | 0.04778992 |
| GLT8D2     | 25.2846145 | -2.614176147 | 0.70803282 | -3.69216806 | 0.00022235 | 0.00613527 |
| MICAL2     | 256.46755  | -2.613106541 | 0.67078608 | -3.8955885  | 9.80E-05   | 0.00338014 |
| GNAI1      | 486.678464 | -2.606030356 | 0.61298924 | -4.25134764 | 2.12E-05   | 0.0011987  |
| STK31      | 6.63175243 | -2.603414519 | 0.92943582 | -2.80106971 | 0.00509335 | 0.04830923 |
| TMEM139    | 9.07289324 | -2.603206345 | 0.89826273 | -2.8980456  | 0.00375496 | 0.03933812 |
| NCAM2      | 115.049403 | -2.602720443 | 0.719075   | -3.61953963 | 0.00029513 | 0.00741304 |
| CLMN       | 101.06973  | -2.601780223 | 0.63695599 | -4.08470956 | 4.41E-05   | 0.00199353 |
| PPAP2C     | 75.1950827 | -2.596992878 | 0.7971457  | -3.25786475 | 0.00112254 | 0.01757769 |
| CACNB4     | 255.50898  | -2.595499585 | 0.62160353 | -4.17549044 | 2.97E-05   | 0.00151872 |
| CX3CR1     | 13.1087207 | -2.593259234 | 0.78965894 | -3.2840244  | 0.00102336 | 0.01647705 |
| ARRB1      | 108.323012 | -2.588854253 | 0.69795332 | -3.7092083  | 0.00020791 | 0.00584229 |
| PHACTR1    | 210.286605 | -2.587991326 | 0.71931529 | -3.59785391 | 0.00032085 | 0.00787099 |
| KIAA0513   | 476.496258 | -2.584712135 | 0.76889655 | -3.36158634 | 0.00077496 | 0.0136922  |
| PLEKHA1    | 277.955338 | -2.583753234 | 0.50705359 | -5.09562163 | 3.48E-07   | 7.30E-05   |
| ZNF492     | 15.2119549 | -2.583665469 | 0.86191679 | -2.99758109 | 0.00272131 | 0.03186383 |
| KCNMA1     | 20.6345871 | -2.58307362  | 0.6403839  | -4.03363301 | 5.49E-05   | 0.00231302 |
| UNC79      | 69.9718186 | -2.578092592 | 0.68200103 | -3.78018868 | 0.00015671 | 0.00475866 |
| RTN3       | 15.8437914 | -2.575121837 | 0.8462929  | -3.04282576 | 0.00234368 | 0.02902225 |
| SLC6A1     | 241.421763 | -2.57381008  | 0.5567205  | -4.62316387 | 3.78E-06   | 0.00035862 |
| VAT1L      | 49.3807699 | -2.573219328 | 0.90765373 | -2.83502315 | 0.00458224 | 0.04512029 |
| CA11       | 967.746936 | -2.572428053 | 0.72144348 | -3.56566818 | 0.00036293 | 0.00847039 |
| GPR34      | 104.998738 | -2.568939759 | 0.7890009  | -3.25594022 | 0.00113018 | 0.01765006 |
| GPR85      | 64.8699551 | -2.566109685 | 0.60382511 | -4.24975653 | 2.14E-05   | 0.0011987  |
| C10orf128  | 105.301293 | -2.56366182  | 0.73046461 | -3.50963179 | 0.00044873 | 0.00974214 |
| ST6GALNAC3 | 202.243542 | -2.560399607 | 0.73684956 | -3.47479287 | 0.00051125 | 0.01050246 |

|                |            |              |            |             |            |            |
|----------------|------------|--------------|------------|-------------|------------|------------|
| HECW2          | 133.224172 | -2.559769256 | 0.54301857 | -4.71396265 | 2.43E-06   | 0.00027772 |
| FOLH1          | 496.333965 | -2.558227802 | 0.81391833 | -3.14310135 | 0.00167168 | 0.02329262 |
| ZNF876P        | 6.93169179 | -2.557639382 | 0.88544845 | -2.88852431 | 0.00387054 | 0.0400992  |
| DIRAS2         | 432.80419  | -2.552989661 | 0.90143092 | -2.83215231 | 0.00462358 | 0.0451976  |
| TMTC1          | 130.111621 | -2.548743465 | 0.59321299 | -4.29650648 | 1.74E-05   | 0.00104869 |
| AGTPBP1        | 163.630889 | -2.545958046 | 0.55349603 | -4.59977656 | 4.23E-06   | 0.00037568 |
| LOC100505576   | 221.707554 | -2.544744747 | 0.71971712 | -3.53575684 | 0.00040661 | 0.00914276 |
| KLHL2          | 771.002758 | -2.544743882 | 0.58238418 | -4.36952779 | 1.25E-05   | 0.00080786 |
| IDI1           | 737.554542 | -2.544226481 | 0.54772173 | -4.64510778 | 3.40E-06   | 0.00033797 |
| THSD7B         | 8.13937471 | -2.544179963 | 0.82750496 | -3.0745193  | 0.00210842 | 0.0270251  |
| TAS2R40        | 66.3261434 | -2.540983332 | 0.67529653 | -3.76276677 | 0.00016804 | 0.00498906 |
| OTUD7A         | 66.6278448 | -2.540702404 | 0.65117884 | -3.90169682 | 9.55E-05   | 0.00332511 |
| SH3TC2         | 94.9400488 | -2.539273486 | 0.86656361 | -2.93027938 | 0.00338657 | 0.03669418 |
| DNAH6          | 27.4855911 | -2.538235016 | 0.76030378 | -3.33844849 | 0.00084248 | 0.01441647 |
| ENPP6          | 80.2678026 | -2.538021899 | 0.87303513 | -2.90712461 | 0.00364768 | 0.03855069 |
| LRRC8B         | 49.7565694 | -2.535779391 | 0.59874961 | -4.23512495 | 2.28E-05   | 0.00126681 |
| RNF125         | 47.5721897 | -2.534233211 | 0.74377444 | -3.40726042 | 0.00065618 | 0.0123064  |
| FOXP2          | 78.9610165 | -2.532486574 | 0.87875862 | -2.88189101 | 0.00395296 | 0.04082705 |
| CABLES1        | 318.9885   | -2.515652366 | 0.81939078 | -3.07014971 | 0.00213951 | 0.02737439 |
| CHN2           | 181.359193 | -2.514526808 | 0.62039577 | -4.05310116 | 5.05E-05   | 0.00218336 |
| HPCA           | 109.087062 | -2.514008596 | 0.86486285 | -2.9068292  | 0.00365112 | 0.03856286 |
| LPGAT1         | 311.726799 | -2.511141711 | 0.55864249 | -4.49507826 | 6.95E-06   | 0.00052879 |
| TTL7           | 604.587286 | -2.510167465 | 0.5205794  | -4.82187241 | 1.42E-06   | 0.00019522 |
| RPS6KA5        | 175.257864 | -2.50938631  | 0.50599124 | -4.95934736 | 7.07E-07   | 0.00011886 |
| TUSC3          | 380.431458 | -2.508956065 | 0.72951279 | -3.43922149 | 0.00058339 | 0.01132019 |
| KCNB1          | 25.5144405 | -2.506582279 | 0.85744351 | -2.92332059 | 0.0034632  | 0.03728095 |
| C9orf30-TMEFF1 | 577.181544 | -2.504043824 | 0.5235846  | -4.78250089 | 1.73E-06   | 0.00022379 |
| SLC25A48       | 27.5399463 | -2.502056651 | 0.87784718 | -2.85021892 | 0.00436891 | 0.04375778 |
| PKP2           | 8.46840321 | -2.495899337 | 0.8690179  | -2.87209197 | 0.00407764 | 0.04180641 |
| KCNAB2         | 222.984941 | -2.495537082 | 0.77828485 | -3.20645721 | 0.0013438  | 0.01989539 |
| SLC30A10       | 43.6457911 | -2.49335164  | 0.50502725 | -4.93706354 | 7.93E-07   | 0.00012886 |
| CCDC7          | 312.506835 | -2.490417628 | 0.46689889 | -5.33395496 | 9.61E-08   | 3.34E-05   |
| SPOCK1         | 1310.46265 | -2.487935597 | 0.69729196 | -3.56799695 | 0.00035972 | 0.00841887 |
| NEK10          | 15.183239  | -2.484017078 | 0.83045863 | -2.99113885 | 0.00277939 | 0.03221026 |
| GVINP1         | 15.7045329 | -2.479850657 | 0.74757155 | -3.31720846 | 0.00090922 | 0.01520248 |
| RAB27B         | 125.20101  | -2.479112018 | 0.8560067  | -2.89613624 | 0.00377788 | 0.03947982 |
| SCN1B          | 409.161672 | -2.475167929 | 0.65549962 | -3.77600211 | 0.00015937 | 0.00481651 |
| TMEM63C        | 34.4873205 | -2.473921128 | 0.73855528 | -3.34967633 | 0.00080906 | 0.01405941 |
| REEP1          | 195.94263  | -2.472554586 | 0.6589186  | -3.75244316 | 0.00017512 | 0.00514841 |
| CFH            | 281.439817 | -2.472271782 | 0.81035737 | -3.05084137 | 0.00228201 | 0.0286171  |
| FBXW7          | 975.421142 | -2.467002342 | 0.66993687 | -3.68244001 | 0.00023101 | 0.00626118 |
| SGK3           | 126.911306 | -2.462915933 | 0.61008337 | -4.03701536 | 5.41E-05   | 0.00228566 |
| DNM3OS         | 60.3402533 | -2.462603647 | 0.58918631 | -4.17966885 | 2.92E-05   | 0.00149563 |
| KCNJ6          | 138.245771 | -2.458484977 | 0.77895121 | -3.15614759 | 0.00159868 | 0.02249934 |
| NLK            | 716.163689 | -2.45804313  | 0.51648021 | -4.75922035 | 1.94E-06   | 0.00024013 |
| KIT            | 24.3449379 | -2.457861411 | 0.77336314 | -3.17814659 | 0.0014822  | 0.02121538 |
| MAMDC2         | 19.2837539 | -2.452111598 | 0.64631342 | -3.79399763 | 0.00014824 | 0.00455401 |
| SLC6A20        | 6.9598493  | -2.4494963   | 0.86081092 | -2.84556834 | 0.00443322 | 0.044185   |



|          |            |              |            |             |            |            |
|----------|------------|--------------|------------|-------------|------------|------------|
| ACTR3B   | 41.3429147 | -2.440134112 | 0.66762595 | -3.65494201 | 0.00025724 | 0.00673312 |
| TMEM181  | 1004.12129 | -2.439338921 | 0.71131456 | -3.42933923 | 0.00060505 | 0.01161978 |
| BTBD8    | 41.4048484 | -2.436984395 | 0.67420623 | -3.61459787 | 0.00030081 | 0.00752214 |
| MAP1A    | 605.928757 | -2.436235077 | 0.63935164 | -3.81047758 | 0.0001387  | 0.00437271 |
| KIRREL3  | 95.446762  | -2.435292203 | 0.5885054  | -4.13809658 | 3.50E-05   | 0.00168136 |
| SEMA3C   | 54.2271457 | -2.424442234 | 0.69633545 | -3.48171593 | 0.00049821 | 0.01033574 |
| POPDC3   | 29.179236  | -2.421884237 | 0.8170188  | -2.96429438 | 0.00303378 | 0.03423749 |
| STXBP5   | 191.406876 | -2.421194118 | 0.54752105 | -4.42210236 | 9.77E-06   | 0.00066498 |
| PPP3CB   | 143.032994 | -2.420417662 | 0.59364013 | -4.0772474  | 4.56E-05   | 0.00203388 |
| NINJ2    | 96.4895583 | -2.417554099 | 0.78361613 | -3.08512548 | 0.00203466 | 0.02638154 |
| MAP2     | 2230.99592 | -2.411090029 | 0.79203915 | -3.04415511 | 0.00233335 | 0.02897973 |
| EGR3     | 159.27316  | -2.410083821 | 0.68874823 | -3.49922324 | 0.00046662 | 0.00991158 |
| FCGR1B   | 30.1143326 | -2.408865857 | 0.7288516  | -3.30501552 | 0.00094971 | 0.01560015 |
| ELOVL4   | 38.1405531 | -2.406892949 | 0.71223534 | -3.37935063 | 0.00072657 | 0.01321356 |
| ATE1     | 62.9514805 | -2.406485033 | 0.52202143 | -4.60993529 | 4.03E-06   | 0.00037167 |
| CLDN10   | 125.403898 | -2.402818642 | 0.76187346 | -3.15382905 | 0.00161143 | 0.02264092 |
| AKT3     | 3489.28582 | -2.400535815 | 0.46943374 | -5.113684   | 3.16E-07   | 7.08E-05   |
| C11orf41 | 128.512544 | -2.39958414  | 0.80053626 | -2.99747089 | 0.0027223  | 0.03186383 |
| GRIN2C   | 24.2028842 | -2.398346709 | 0.78629862 | -3.05017285 | 0.0022871  | 0.02864191 |
| TRPC3    | 10.8719838 | -2.395647942 | 0.78604253 | -3.04773322 | 0.00230575 | 0.02875397 |
| CYFIP2   | 303.901543 | -2.395440529 | 0.64624676 | -3.7066964  | 0.00020998 | 0.00589067 |
| MEGF10   | 260.235468 | -2.38935638  | 0.72082601 | -3.31474772 | 0.00091726 | 0.01528085 |
| GIMAP4   | 63.3896681 | -2.381638304 | 0.66641537 | -3.57380456 | 0.00035183 | 0.00830362 |
| SLIT3    | 39.9128839 | -2.381147244 | 0.69116223 | -3.44513507 | 0.00057077 | 0.01115266 |
| STXBP1   | 891.274644 | -2.378763654 | 0.66593902 | -3.57204426 | 0.00035421 | 0.00834249 |
| PCP4     | 103.127355 | -2.375405951 | 0.82371731 | -2.88376353 | 0.00392954 | 0.04061005 |
| PRKACB   | 1050.2612  | -2.374400027 | 0.48450897 | -4.90063168 | 9.55E-07   | 0.00014844 |
| ITM2A    | 498.36179  | -2.374269338 | 0.7784496  | -3.0499975  | 0.00228843 | 0.02864191 |
| PYGM     | 57.2491976 | -2.359501621 | 0.65663994 | -3.59329594 | 0.00032652 | 0.00794047 |
| FSIP1    | 101.188581 | -2.357735016 | 0.63384948 | -3.71970806 | 0.00019945 | 0.00567109 |
| AKAP6    | 327.503126 | -2.352191061 | 0.54970345 | -4.27901822 | 1.88E-05   | 0.00109911 |
| PPARG    | 53.5059249 | -2.35152967  | 0.7850516  | -2.99538229 | 0.00274101 | 0.03192568 |
| KIAA1804 | 44.4238839 | -2.348316555 | 0.72005321 | -3.26130976 | 0.00110899 | 0.01751451 |
| PNCK     | 47.5763309 | -2.345040256 | 0.81955529 | -2.86135697 | 0.00421832 | 0.04290604 |
| AMN1     | 76.7239156 | -2.337394877 | 0.62520335 | -3.73861541 | 0.00018504 | 0.00534253 |
| ADAM28   | 34.8417881 | -2.335099837 | 0.6721218  | -3.47422123 | 0.00051234 | 0.01051201 |
| CCNE2    | 53.5104828 | -2.332551115 | 0.72405546 | -3.22150891 | 0.00127517 | 0.01921797 |
| NUAK1    | 268.791281 | -2.331317684 | 0.52341752 | -4.45403063 | 8.43E-06   | 0.00060518 |
| NIPAL2   | 36.0760404 | -2.325540128 | 0.76488835 | -3.04036545 | 0.00236291 | 0.029153   |
| TTC39C   | 74.907512  | -2.324877306 | 0.68358304 | -3.40101664 | 0.00067136 | 0.01249334 |
| CAB39L   | 72.1296797 | -2.321033791 | 0.63204516 | -3.67225944 | 0.00024042 | 0.0064228  |
| SYNPO2   | 33.9178951 | -2.319520864 | 0.76478772 | -3.03289503 | 0.0024222  | 0.02965194 |
| DNAJC12  | 230.628684 | -2.311552267 | 0.62520553 | -3.6972678  | 0.00021793 | 0.00604313 |
| HERC2P4  | 15.6051014 | -2.309733168 | 0.80791492 | -2.85888168 | 0.00425137 | 0.0430881  |
| DOCK9    | 608.335559 | -2.305487825 | 0.55330141 | -4.16678464 | 3.09E-05   | 0.00155892 |
| RTN2     | 21.8717874 | -2.305041526 | 0.77578088 | -2.97125333 | 0.00296587 | 0.03381172 |
| CABYR    | 23.8398892 | -2.302620484 | 0.71713992 | -3.21083852 | 0.00132348 | 0.01966384 |
| BCL11A   | 105.176135 | -2.301266627 | 0.77006367 | -2.98841087 | 0.00280432 | 0.03241673 |

|           |            |              |            |             |            |            |
|-----------|------------|--------------|------------|-------------|------------|------------|
| NTN4      | 68.7955507 | -2.300409483 | 0.4623104  | -4.97589823 | 6.49E-07   | 0.00011488 |
| BCO2      | 26.6210406 | -2.297697376 | 0.65229493 | -3.52248233 | 0.00042753 | 0.00945281 |
| CD86      | 159.417484 | -2.292363168 | 0.82016768 | -2.79499331 | 0.00519008 | 0.04883208 |
| PDK4      | 1659.12799 | -2.292044514 | 0.67209522 | -3.41029732 | 0.00064892 | 0.01222474 |
| SAMD3     | 31.830272  | -2.29020877  | 0.68761783 | -3.33064191 | 0.00086646 | 0.01475176 |
| CMTM5     | 142.012769 | -2.286614329 | 0.7010796  | -3.26156165 | 0.001108   | 0.01751451 |
| KIF1A     | 768.941384 | -2.2835034   | 0.69239662 | -3.29797019 | 0.00097386 | 0.01587277 |
| ENOX1     | 25.5459573 | -2.28110248  | 0.56373977 | -4.04637497 | 5.20E-05   | 0.00222983 |
| CLSTN2    | 243.74059  | -2.279420405 | 0.75706448 | -3.01086694 | 0.00260503 | 0.03104604 |
| HOMER1    | 429.876949 | -2.277996709 | 0.80222071 | -2.83961343 | 0.00451682 | 0.04462122 |
| KIAA1324  | 62.5116088 | -2.276881117 | 0.62589694 | -3.63778917 | 0.00027499 | 0.0070656  |
| CNNM2     | 76.7220624 | -2.275527763 | 0.58461467 | -3.8923549  | 9.93E-05   | 0.00341851 |
| ADD3      | 128.866404 | -2.27341691  | 0.56959305 | -3.99130029 | 6.57E-05   | 0.00257461 |
| CXorf21   | 78.2759633 | -2.272571016 | 0.76367862 | -2.9758212  | 0.00292205 | 0.03349397 |
| LOC283070 | 405.145095 | -2.272446438 | 0.66010787 | -3.44253801 | 0.00057628 | 0.01123417 |
| GLT1D1    | 81.390034  | -2.270365427 | 0.79657075 | -2.85017423 | 0.00436953 | 0.04375778 |
| CAMK1D    | 302.936453 | -2.270078111 | 0.54795964 | -4.14278343 | 3.43E-05   | 0.00165682 |
| TMCC2     | 209.449248 | -2.264183427 | 0.75753888 | -2.98886763 | 0.00280013 | 0.03240596 |
| KCNQ3     | 330.741467 | -2.263124412 | 0.72527003 | -3.12038873 | 0.00180613 | 0.02429954 |
| KCNA2     | 116.714368 | -2.260326456 | 0.78103087 | -2.89402959 | 0.00380332 | 0.03962247 |
| IFIT1     | 353.35004  | -2.257241541 | 0.80296612 | -2.81112924 | 0.0049368  | 0.04737744 |
| CAMKK1    | 126.862225 | -2.254002672 | 0.79971702 | -2.81850031 | 0.00482486 | 0.04673019 |
| NSF       | 1078.17369 | -2.252854922 | 0.58897753 | -3.82502692 | 0.00013076 | 0.00416936 |
| NAP1L5    | 83.4760333 | -2.250022413 | 0.66325875 | -3.392375   | 0.0006929  | 0.01278092 |
| SGMS1     | 157.188112 | -2.24996938  | 0.5114334  | -4.39933991 | 1.09E-05   | 0.00071834 |
| PLAC8     | 54.8375821 | -2.248874833 | 0.78661587 | -2.85892381 | 0.00425081 | 0.0430881  |
| TPIIP3    | 11.8214776 | -2.248872933 | 0.7999455  | -2.81128269 | 0.00493444 | 0.04737744 |
| CAMKK2    | 243.657531 | -2.241769622 | 0.65934713 | -3.39998391 | 0.0006739  | 0.01251291 |
| DEPTOR    | 286.522883 | -2.240538854 | 0.60965487 | -3.67509383 | 0.00023776 | 0.00637217 |
| CNTNAP3   | 26.8056417 | -2.23923172  | 0.76913035 | -2.91138131 | 0.00359835 | 0.03829424 |
| TSC22D2   | 29.5604367 | -2.238090779 | 0.57202401 | -3.91258188 | 9.13E-05   | 0.00324408 |
| SELENBP1  | 67.6023626 | -2.237632262 | 0.73981899 | -3.02456724 | 0.00248989 | 0.03014419 |
| GOT1      | 337.904561 | -2.235608688 | 0.62022414 | -3.60451736 | 0.00031273 | 0.00774392 |
| FAM65B    | 40.1248465 | -2.235308821 | 0.59660303 | -3.74672727 | 0.00017916 | 0.00525401 |
| SVIP      | 55.1279037 | -2.231615839 | 0.62477912 | -3.57184767 | 0.00035447 | 0.00834249 |
| SLC44A1   | 957.080701 | -2.231443188 | 0.55132292 | -4.04743411 | 5.18E-05   | 0.00222544 |
| 3-Sep     | 1148.52338 | -2.225260568 | 0.71509478 | -3.11184004 | 0.00185925 | 0.02475663 |
| MAPK10    | 1459.27832 | -2.221958741 | 0.5460122  | -4.0694306  | 4.71E-05   | 0.00205699 |
| PRKAR2B   | 264.926373 | -2.221689454 | 0.64131104 | -3.46429319 | 0.00053163 | 0.01074772 |
| SLC2A12   | 36.8988743 | -2.219281887 | 0.59127086 | -3.75340989 | 0.00017445 | 0.00514277 |
| PLEKHH1   | 291.386675 | -2.217355803 | 0.79224325 | -2.79883207 | 0.00512878 | 0.04849973 |
| FAM55C    | 243.517786 | -2.21474449  | 0.54206427 | -4.08576    | 4.39E-05   | 0.00198988 |
| LOC644242 | 97.8613311 | -2.211737282 | 0.73580556 | -3.00587194 | 0.00264821 | 0.03127227 |
| EFHA2     | 62.2297786 | -2.211264969 | 0.56549272 | -3.91033325 | 9.22E-05   | 0.00324895 |
| C3AR1     | 145.566421 | -2.203892796 | 0.67576739 | -3.26131866 | 0.00110895 | 0.01751451 |
| CSDE1     | 46.5068396 | -2.200961198 | 0.59736041 | -3.68447782 | 0.00022917 | 0.00625184 |
| ZDHHC20   | 387.601072 | -2.200093648 | 0.62994198 | -3.49253378 | 0.00047846 | 0.0100879  |
| FUT8      | 569.321064 | -2.199051561 | 0.54693718 | -4.02066569 | 5.80E-05   | 0.00238832 |

|           |            |              |            |             |            |            |
|-----------|------------|--------------|------------|-------------|------------|------------|
| RGS20     | 22.9028048 | -2.198744074 | 0.67943717 | -3.23612567 | 0.00121164 | 0.0185263  |
| RASGEF1B  | 162.517707 | -2.194383043 | 0.58962522 | -3.72165737 | 0.00019792 | 0.00564385 |
| GPR37     | 784.5164   | -2.186580571 | 0.64989494 | -3.36451393 | 0.00076679 | 0.01367251 |
| CAPNS2    | 18.0843057 | -2.185791176 | 0.63782239 | -3.426959   | 0.00061038 | 0.01169594 |
| PBOV1     | 27.8403134 | -2.183986942 | 0.7165565  | -3.04789214 | 0.00230453 | 0.02875397 |
| PIR-FIGF  | 25.3592403 | -2.183076993 | 0.7443973  | -2.93267719 | 0.00336053 | 0.0365504  |
| LOC387646 | 21.6670795 | -2.183049273 | 0.65278952 | -3.34418551 | 0.00082525 | 0.0142669  |
| LOC439949 | 71.9820696 | -2.18266798  | 0.753988   | -2.8948312  | 0.00379362 | 0.03954595 |
| FAM171B   | 457.896878 | -2.182543988 | 0.54434529 | -4.00948447 | 6.09E-05   | 0.00244629 |
| SPINT2    | 228.435898 | -2.179653038 | 0.59325458 | -3.67406018 | 0.00023873 | 0.00638783 |
| KIAA1107  | 362.074509 | -2.177337481 | 0.57193195 | -3.806987   | 0.00014067 | 0.00439372 |
| CTNNA2    | 284.412222 | -2.175085234 | 0.64829205 | -3.35510088 | 0.00079336 | 0.01388711 |
| EMCN      | 109.23443  | -2.170213352 | 0.75924448 | -2.85838542 | 0.00425803 | 0.04312954 |
| PAQR6     | 432.025773 | -2.168913489 | 0.60942189 | -3.55896877 | 0.00037231 | 0.00860572 |
| NIPAL3    | 440.919716 | -2.168840719 | 0.63287861 | -3.42694584 | 0.00061041 | 0.01169594 |
| PCDHAC2   | 76.2617449 | -2.167450345 | 0.63575565 | -3.40925064 | 0.00065142 | 0.012258   |
| PNMAL2    | 103.208598 | -2.165443623 | 0.74390196 | -2.91092607 | 0.00360359 | 0.03830156 |
| CD84      | 427.111638 | -2.165342011 | 0.7295744  | -2.96795229 | 0.00299791 | 0.03399248 |
| EMB       | 101.502607 | -2.160514863 | 0.67195203 | -3.21528139 | 0.00130317 | 0.01951731 |
| MTMR8     | 9.80901414 | -2.157630289 | 0.77011256 | -2.80170769 | 0.00508329 | 0.04825967 |
| HSPA2     | 503.38369  | -2.156945065 | 0.74658383 | -2.88908623 | 0.00386363 | 0.04007683 |
| SEMA4D    | 646.382052 | -2.15673158  | 0.67207927 | -3.20904344 | 0.00133177 | 0.0197521  |
| CALM2     | 8546.03988 | -2.154101163 | 0.52912832 | -4.07103739 | 4.68E-05   | 0.00205352 |
| SCN11A    | 6.11803804 | -2.149911735 | 0.7554576  | -2.84584037 | 0.00442944 | 0.04417347 |
| ASPHD1    | 332.037137 | -2.149838305 | 0.6908043  | -3.11208009 | 0.00185774 | 0.02475613 |
| SSX2IP    | 176.054837 | -2.149294919 | 0.60708473 | -3.54035413 | 0.00039959 | 0.00902839 |
| CAMK2G    | 126.042436 | -2.146677139 | 0.56233377 | -3.81744306 | 0.00013484 | 0.00427525 |
| SLC1A2    | 1688.24448 | -2.144886346 | 0.76847652 | -2.79108897 | 0.0052531  | 0.04920465 |
| NTRK2     | 198.100764 | -2.14134254  | 0.64960442 | -3.29637925 | 0.0009794  | 0.01593203 |
| CSRNP3    | 217.03518  | -2.135780171 | 0.48960685 | -4.36223507 | 1.29E-05   | 0.00082887 |
| NR4A2     | 42.5634521 | -2.134761347 | 0.65679572 | -3.25026683 | 0.00115297 | 0.01780742 |
| NAP1L3    | 223.97762  | -2.134104208 | 0.59153272 | -3.60775345 | 0.00030886 | 0.00767763 |
| METTL24   | 22.8372285 | -2.131279945 | 0.65128204 | -3.27243776 | 0.00106624 | 0.01703512 |
| SATB1     | 330.949815 | -2.130167292 | 0.51230178 | -4.15803218 | 3.21E-05   | 0.00159589 |
| GFOD1     | 188.90951  | -2.129279556 | 0.71045715 | -2.99705555 | 0.00272601 | 0.03187286 |
| PLXDC2    | 591.133663 | -2.12736346  | 0.71039718 | -2.99461137 | 0.00274795 | 0.03195606 |
| ATG4C     | 153.39729  | -2.126642325 | 0.65246171 | -3.25941324 | 0.00111643 | 0.01756599 |
| C10orf131 | 25.5928266 | -2.125438132 | 0.60414776 | -3.51807665 | 0.00043469 | 0.00956083 |
| AP3B2     | 50.9433443 | -2.123117361 | 0.64578    | -3.28767903 | 0.00101017 | 0.01633772 |
| SYNJ1     | 166.229434 | -2.122964724 | 0.53907086 | -3.93819236 | 8.21E-05   | 0.00298608 |
| C2orf15   | 26.5256341 | -2.113209187 | 0.5649696  | -3.7403945  | 0.00018373 | 0.00532315 |
| TEK       | 115.421496 | -2.110710885 | 0.57672973 | -3.65979206 | 0.00025242 | 0.0066276  |
| KCNH1     | 148.535321 | -2.109287885 | 0.67904041 | -3.10627742 | 0.00189459 | 0.02510778 |
| GOLGA7B   | 43.0077029 | -2.1082349   | 0.71979003 | -2.92895817 | 0.003401   | 0.03680002 |
| PLK2      | 129.950467 | -2.103479783 | 0.74361988 | -2.82870301 | 0.0046737  | 0.04555507 |
| PAK1      | 1315.30919 | -2.102326644 | 0.54956668 | -3.82542594 | 0.00013055 | 0.00416936 |
| EFHD1     | 889.064445 | -2.101708145 | 0.74897616 | -2.8061082  | 0.00501439 | 0.04782164 |
| ABCG2     | 203.918244 | -2.101485377 | 0.66880143 | -3.1421664  | 0.00167703 | 0.02332537 |

|              |            |              |            |             |            |            |
|--------------|------------|--------------|------------|-------------|------------|------------|
| FAM69A       | 60.4344287 | -2.099935675 | 0.50821765 | -4.1319613  | 3.60E-05   | 0.0017122  |
| LOC100288637 | 112.756726 | -2.096282385 | 0.54479087 | -3.84786625 | 0.00011915 | 0.0039157  |
| LOC147670    | 11.4937756 | -2.094117828 | 0.70827707 | -2.95663647 | 0.00311015 | 0.03477714 |
| TSPAN15      | 167.187301 | -2.093121772 | 0.61735422 | -3.39047129 | 0.00069773 | 0.0128559  |
| DOCK3        | 256.237142 | -2.085894701 | 0.5654524  | -3.68889532 | 0.00022523 | 0.00618425 |
| OSBPL1A      | 1514.85672 | -2.085829341 | 0.52695828 | -3.95824382 | 7.55E-05   | 0.00285399 |
| UBE2W        | 56.3261699 | -2.085098484 | 0.63096838 | -3.30460061 | 0.00095112 | 0.015608   |
| GDAP1        | 507.249329 | -2.082854082 | 0.52114848 | -3.99666154 | 6.42E-05   | 0.00254006 |
| TEF          | 84.0698066 | -2.082192929 | 0.64314415 | -3.23752139 | 0.00120573 | 0.01845271 |
| SCAMP5       | 571.94414  | -2.081377529 | 0.58462828 | -3.56017249 | 0.00037061 | 0.0085935  |
| L3MBTL4      | 150.562889 | -2.080359597 | 0.67118314 | -3.09954092 | 0.00193821 | 0.02549761 |
| MYRIP        | 238.93968  | -2.079649481 | 0.68726727 | -3.02596903 | 0.00247838 | 0.03011777 |
| LPAR5        | 30.7970303 | -2.075436176 | 0.66249855 | -3.1327407  | 0.00173182 | 0.023737   |
| ANKRD46      | 14.7187602 | -2.070130019 | 0.67131664 | -3.08368645 | 0.00204453 | 0.02644825 |
| STEAP2       | 161.850322 | -2.068849281 | 0.74054511 | -2.79368434 | 0.00521113 | 0.04898805 |
| LDB2         | 160.330228 | -2.068672517 | 0.65823024 | -3.1427795  | 0.00167352 | 0.02329893 |
| LIPA         | 795.479657 | -2.06724338  | 0.63448464 | -3.25814568 | 0.00112143 | 0.01757769 |
| AGBL4        | 69.0097489 | -2.066849503 | 0.66848883 | -3.09182353 | 0.00198931 | 0.02593357 |
| FAM105A      | 99.6417792 | -2.063677639 | 0.59490798 | -3.46890224 | 0.00052259 | 0.01063147 |
| APBB2        | 204.61162  | -2.06297423  | 0.53753784 | -3.83782142 | 0.00012413 | 0.00401133 |
| ADRB2        | 26.8628303 | -2.06286623  | 0.63393372 | -3.25407239 | 0.00113763 | 0.01773356 |
| MORF4L1      | 58.8275485 | -2.0623669   | 0.59854554 | -3.44563074 | 0.00056973 | 0.01114678 |
| TMOD2        | 2197.99413 | -2.062155972 | 0.52663573 | -3.91571604 | 9.01E-05   | 0.003209   |
| SLC12A2      | 325.261864 | -2.062037748 | 0.539061   | -3.82524006 | 0.00013064 | 0.00416936 |
| ME1          | 145.316073 | -2.060674906 | 0.70607466 | -2.91849437 | 0.00351726 | 0.03774207 |
| NRXN1        | 526.090532 | -2.060574853 | 0.70097397 | -2.93958827 | 0.00328649 | 0.03602487 |
| HPSE         | 19.7600432 | -2.054303817 | 0.68240159 | -3.01040302 | 0.00260901 | 0.03105452 |
| USP54        | 636.467289 | -2.052455041 | 0.46881157 | -4.37799572 | 1.20E-05   | 0.00078622 |
| C8orf46      | 732.455142 | -2.049351443 | 0.60190483 | -3.40477654 | 0.00066218 | 0.01237743 |
| MYO1D        | 92.5068213 | -2.044375564 | 0.59896802 | -3.41316313 | 0.00064213 | 0.01215228 |
| LOC100129858 | 33.2559172 | -2.043106069 | 0.4976664  | -4.1053727  | 4.04E-05   | 0.0018584  |
| PANK1        | 21.0844707 | -2.041489502 | 0.63394515 | -3.2202936  | 0.00128059 | 0.01928234 |
| RIIAD1       | 20.6178345 | -2.039408377 | 0.6440243  | -3.16666369 | 0.00154199 | 0.0218123  |
| GPM6B        | 232.536876 | -2.036581356 | 0.64011554 | -3.18158402 | 0.00146472 | 0.02110906 |
| DACH1        | 35.3503321 | -2.035335958 | 0.69328711 | -2.93577642 | 0.00332714 | 0.03632831 |
| R3HDM1       | 848.022312 | -2.031248965 | 0.53342862 | -3.80791149 | 0.00014015 | 0.00438548 |
| CNKSR2       | 106.172868 | -2.029851364 | 0.56377193 | -3.60048321 | 0.00031763 | 0.00783758 |
| SYNJ2        | 396.128099 | -2.025274951 | 0.67162865 | -3.01546838 | 0.00256583 | 0.03079725 |
| ADRBK2       | 24.5495902 | -2.022058164 | 0.59883239 | -3.37666797 | 0.0007337  | 0.01331428 |
| SCOC         | 260.315796 | -2.020877993 | 0.57207303 | -3.53255244 | 0.00041157 | 0.00918289 |
| CYSLTR1      | 35.861274  | -2.018567191 | 0.71305257 | -2.83088131 | 0.00464199 | 0.0453512  |
| MAP2K4       | 378.506278 | -2.016735467 | 0.55010466 | -3.66609415 | 0.00024628 | 0.00652767 |
| RPS6KC1      | 674.921638 | -2.003951021 | 0.44727051 | -4.48040048 | 7.45E-06   | 0.00055396 |
| AMICA1       | 10.9249003 | -2.003012812 | 0.68243465 | -2.93509836 | 0.00333442 | 0.03638415 |
| MST4         | 12.3057331 | -1.999398904 | 0.65217627 | -3.0657339  | 0.00217136 | 0.02764213 |
| RNF175       | 79.778071  | -1.998419791 | 0.70336492 | -2.84122756 | 0.00449402 | 0.0445405  |
| PTBP2        | 318.995874 | -1.99460259  | 0.41779054 | -4.77416891 | 1.80E-06   | 0.00022799 |
| EPB41L2      | 59.8241967 | -1.994601041 | 0.50124162 | -3.97932044 | 6.91E-05   | 0.00266783 |

|              |            |              |            |             |            |            |
|--------------|------------|--------------|------------|-------------|------------|------------|
| CSF2RA       | 126.824441 | -1.993571014 | 0.57620955 | -3.45980208 | 0.00054057 | 0.01082691 |
| TDRD6        | 50.2320905 | -1.992067191 | 0.61873404 | -3.21958559 | 0.00128376 | 0.01931272 |
| CD200        | 207.753905 | -1.987791153 | 0.53693308 | -3.70212087 | 0.0002138  | 0.00596806 |
| LY86         | 194.131627 | -1.981741723 | 0.67337756 | -2.94298747 | 0.00325062 | 0.03579512 |
| TMEM150C     | 31.906283  | -1.980820921 | 0.5927492  | -3.34175219 | 0.00083251 | 0.01433356 |
| DAPP1        | 20.0412038 | -1.980161841 | 0.67279998 | -2.94316571 | 0.00324874 | 0.03579512 |
| EML5         | 65.212741  | -1.976934513 | 0.65292554 | -3.02781006 | 0.00246333 | 0.03000642 |
| FAM171A1     | 145.255756 | -1.97040807  | 0.53787112 | -3.66334607 | 0.00024894 | 0.00657874 |
| EPB41L5      | 446.229096 | -1.965560203 | 0.56422859 | -3.48362388 | 0.00049467 | 0.01030645 |
| INPP4B       | 25.1508271 | -1.964527761 | 0.69146001 | -2.84112997 | 0.0044954  | 0.0445405  |
| CAP2         | 220.387014 | -1.961160319 | 0.69970798 | -2.80282686 | 0.00506569 | 0.04811972 |
| TSGA10       | 14.6141712 | -1.960361975 | 0.6338423  | -3.0928229  | 0.00198262 | 0.02591779 |
| CLCN4        | 109.698837 | -1.958191587 | 0.65376004 | -2.99527576 | 0.00274197 | 0.03192568 |
| MAP7         | 1424.48867 | -1.957201524 | 0.60398651 | -3.24047226 | 0.00119332 | 0.01834632 |
| PHYHIPL      | 687.979792 | -1.95676999  | 0.63945733 | -3.06004777 | 0.00221302 | 0.02800266 |
| RAB6B        | 807.619009 | -1.949550047 | 0.6789878  | -2.87125931 | 0.0040884  | 0.04184012 |
| UCHL1        | 2082.57674 | -1.948187628 | 0.6479391  | -3.00674499 | 0.00264061 | 0.0312705  |
| PLCB4        | 53.2173582 | -1.947655924 | 0.55107197 | -3.53430407 | 0.00040885 | 0.00915117 |
| NCEH1        | 95.2339598 | -1.939876732 | 0.67989183 | -2.85321377 | 0.00432795 | 0.04349693 |
| ATP2B1       | 351.110366 | -1.938302518 | 0.5764341  | -3.36257436 | 0.00077219 | 0.01367407 |
| RNLS         | 82.5981521 | -1.936687132 | 0.57998637 | -3.33919424 | 0.00084022 | 0.01441647 |
| PTPRK        | 258.418044 | -1.933532954 | 0.47855417 | -4.0403638  | 5.34E-05   | 0.00226465 |
| PTPN4        | 358.145448 | -1.932044026 | 0.52033429 | -3.71308229 | 0.00020475 | 0.00578256 |
| PTPRM        | 117.22557  | -1.929555444 | 0.41321548 | -4.66961073 | 3.02E-06   | 0.00031302 |
| ATP6AP1L     | 73.8367183 | -1.926101092 | 0.67972297 | -2.83365603 | 0.00460188 | 0.04516942 |
| LOC100506207 | 18.1741694 | -1.924546029 | 0.62400432 | -3.08418701 | 0.00204109 | 0.02642841 |
| MRV11        | 95.3060499 | -1.923610982 | 0.58654543 | -3.27956011 | 0.00103969 | 0.01670264 |
| RIMKLA       | 115.141042 | -1.922779393 | 0.66905557 | -2.87387099 | 0.00405475 | 0.04163439 |
| SEC61A2      | 133.005559 | -1.922379231 | 0.55760756 | -3.44754872 | 0.0005657  | 0.01112319 |
| KCNMB4       | 441.050086 | -1.921935047 | 0.57067255 | -3.36784212 | 0.00075759 | 0.01359539 |
| NDRG2        | 2959.9883  | -1.915605429 | 0.50600082 | -3.78577532 | 0.00015323 | 0.00466463 |
| ANKRD29      | 36.1833707 | -1.914954035 | 0.67181094 | -2.85043593 | 0.00436593 | 0.04375778 |
| PEBP4        | 34.1659518 | -1.912473196 | 0.67983739 | -2.81313329 | 0.00490613 | 0.047218   |
| LINC00263    | 114.506704 | -1.906800002 | 0.47793226 | -3.98968671 | 6.62E-05   | 0.0025855  |
| EXOC6        | 124.06761  | -1.902332215 | 0.4754112  | -4.00144591 | 6.30E-05   | 0.00250693 |
| DHCR24       | 286.328817 | -1.897956957 | 0.59041395 | -3.2146208  | 0.00130617 | 0.01953678 |
| STAMBPL1     | 111.077178 | -1.897418132 | 0.59513704 | -3.18820374 | 0.0014316  | 0.02081016 |
| NCDN         | 435.389371 | -1.895764177 | 0.64042766 | -2.96015348 | 0.00307486 | 0.0344926  |
| ALCAM        | 297.498586 | -1.894796463 | 0.57125378 | -3.31690839 | 0.00091019 | 0.01520369 |
| MYH15        | 19.0868158 | -1.894100832 | 0.65802734 | -2.87845307 | 0.00399631 | 0.04117348 |
| FAM73A       | 110.275037 | -1.892179951 | 0.6161386  | -3.07102974 | 0.00213322 | 0.02732211 |
| GABARAPL1    | 725.396352 | -1.891147853 | 0.57269064 | -3.30221538 | 0.00095924 | 0.01566485 |
| STOX2        | 229.355366 | -1.890812066 | 0.51995579 | -3.63648622 | 0.00027638 | 0.00707977 |
| N4BP2L2      | 183.720072 | -1.88799081  | 0.55271217 | -3.41586619 | 0.00063579 | 0.01205857 |
| PPM1K        | 328.390357 | -1.884087898 | 0.4546954  | -4.1436265  | 3.42E-05   | 0.00165549 |
| TTC13        | 65.4265553 | -1.880998363 | 0.51053107 | -3.68439547 | 0.00022925 | 0.00625184 |
| 1-Mar        | 170.861996 | -1.879765825 | 0.6063429  | -3.10016958 | 0.0019341  | 0.02548095 |
| ZNF124       | 538.063332 | -1.876607687 | 0.52924143 | -3.54584424 | 0.00039136 | 0.00892316 |

|           |            |              |            |             |            |            |
|-----------|------------|--------------|------------|-------------|------------|------------|
| KCNJ2     | 77.5376286 | -1.875949841 | 0.55723345 | -3.36654204 | 0.00076117 | 0.01362162 |
| UBE3D     | 318.907126 | -1.871845001 | 0.55760707 | -3.35692477 | 0.00078815 | 0.0138546  |
| FAM125B   | 311.853944 | -1.86623135  | 0.48560426 | -3.84311159 | 0.00012148 | 0.00396644 |
| KBTBD3    | 82.4209778 | -1.865176646 | 0.51130558 | -3.64787074 | 0.00026442 | 0.00687826 |
| CLEC4E    | 58.5069855 | -1.863509976 | 0.5674626  | -3.28393446 | 0.00102369 | 0.01647705 |
| SLC24A4   | 46.6857319 | -1.860753488 | 0.61720645 | -3.01479918 | 0.00257149 | 0.03084325 |
| PCYT1B    | 98.7137759 | -1.860697146 | 0.4701165  | -3.95794904 | 7.56E-05   | 0.00285399 |
| ZCWPW2    | 75.1274445 | -1.85939201  | 0.52927743 | -3.5130763  | 0.00044295 | 0.00969184 |
| SORCS2    | 93.80275   | -1.856904356 | 0.49363237 | -3.76171516 | 0.00016875 | 0.00500125 |
| GNAO1     | 2312.47421 | -1.854774168 | 0.55888186 | -3.31872317 | 0.0009043  | 0.01515041 |
| TBC1D12   | 745.394599 | -1.854681953 | 0.51778545 | -3.58195069 | 0.00034104 | 0.00814257 |
| PDE3B     | 38.0225021 | -1.854142325 | 0.65012963 | -2.85195788 | 0.00434509 | 0.04361698 |
| LPCAT2    | 286.303411 | -1.851800015 | 0.57267754 | -3.2335824  | 0.00122248 | 0.01864117 |
| RYR1      | 102.969421 | -1.848153519 | 0.62419426 | -2.96086274 | 0.00306779 | 0.03448233 |
| ADIPOR2   | 170.301352 | -1.844188915 | 0.43652717 | -4.22468298 | 2.39E-05   | 0.00131399 |
| TRAPPC6B  | 172.515789 | -1.843601305 | 0.61265144 | -3.0092173  | 0.00261922 | 0.03108286 |
| MRO       | 211.721946 | -1.836407672 | 0.46516722 | -3.94784412 | 7.89E-05   | 0.00293226 |
| LIG4      | 77.4427986 | -1.835180147 | 0.51960136 | -3.5319002  | 0.00041259 | 0.00918289 |
| S100B     | 6486.33091 | -1.832790182 | 0.64434102 | -2.84444124 | 0.00444894 | 0.04428908 |
| MAPRE3    | 78.9064923 | -1.829812188 | 0.52007319 | -3.5183744  | 0.0004342  | 0.00956083 |
| C10orf118 | 278.304584 | -1.823685715 | 0.41194523 | -4.42701015 | 9.55E-06   | 0.00066024 |
| ELMO1     | 97.2660395 | -1.820466252 | 0.62289723 | -2.92257882 | 0.00347146 | 0.03734595 |
| ATP6V1H   | 610.487745 | -1.818695371 | 0.49319132 | -3.68760619 | 0.00022637 | 0.00620552 |
| NSFP1     | 946.837049 | -1.815605001 | 0.55799423 | -3.25380602 | 0.0011387  | 0.01773375 |
| NAPEPLD   | 634.345489 | -1.81507535  | 0.49178288 | -3.69080632 | 0.00022354 | 0.00614802 |
| MDH1      | 2620.44462 | -1.814814115 | 0.59707221 | -3.03952197 | 0.00236954 | 0.02921331 |
| PLS1      | 22.4987424 | -1.813980683 | 0.46507941 | -3.90036763 | 9.60E-05   | 0.00333465 |
| ACADSB    | 49.9422676 | -1.812651969 | 0.54317734 | -3.33712739 | 0.00084649 | 0.01445573 |
| ERMP1     | 223.89365  | -1.798253042 | 0.49108497 | -3.66179615 | 0.00025045 | 0.00659657 |
| TRPV3     | 29.7960394 | -1.797083663 | 0.62580415 | -2.8716391  | 0.00408349 | 0.04183781 |
| KCNJ10    | 178.115832 | -1.795909251 | 0.56141438 | -3.19890139 | 0.00137952 | 0.02029905 |
| HSD17B6   | 17.0027191 | -1.795329702 | 0.61855273 | -2.90246832 | 0.00370235 | 0.03898134 |
| CHIC1     | 40.5320407 | -1.794705214 | 0.60304744 | -2.97605976 | 0.00291978 | 0.03349397 |
| LDHD      | 27.0484449 | -1.790272666 | 0.54197577 | -3.30323374 | 0.00095577 | 0.01564758 |
| NDFIP2    | 301.847197 | -1.785571077 | 0.54166046 | -3.2964767  | 0.00097906 | 0.01593203 |
| PURA      | 17.2013372 | -1.785501074 | 0.56603965 | -3.15437454 | 0.00160843 | 0.02261755 |
| LOC338758 | 14.6897785 | -1.785370973 | 0.54393445 | -3.28232744 | 0.00102954 | 0.01655539 |
| MOAP1     | 487.616671 | -1.785139268 | 0.57729747 | -3.09223468 | 0.00198656 | 0.02591779 |
| TSPAN7    | 2052.01198 | -1.785026128 | 0.56093879 | -3.18221196 | 0.00146155 | 0.02108142 |
| ANXA2P1   | 108.299783 | -1.784761392 | 0.4846327  | -3.68270936 | 0.00023077 | 0.00626118 |
| MAPRE2    | 39.053783  | -1.784598652 | 0.57578977 | -3.09939275 | 0.00193918 | 0.02549761 |
| AMY2B     | 306.246407 | -1.783502009 | 0.45027111 | -3.96095148 | 7.47E-05   | 0.00283812 |
| IDS       | 3785.19277 | -1.782664464 | 0.61092868 | -2.91795837 | 0.00352331 | 0.03778288 |
| SLC30A4   | 66.8698384 | -1.780536992 | 0.50898767 | -3.49819276 | 0.00046842 | 0.00991527 |
| SDPR      | 287.733567 | -1.780187892 | 0.62249679 | -2.85975435 | 0.00423969 | 0.04302162 |
| LRRC6     | 113.223273 | -1.778232446 | 0.51441321 | -3.45681723 | 0.0005466  | 0.0108956  |
| APBA1     | 305.109209 | -1.775416224 | 0.54500164 | -3.25763465 | 0.00112345 | 0.01757769 |
| SELL      | 95.092716  | -1.770693771 | 0.52980644 | -3.3421522  | 0.00083131 | 0.0143276  |

|              |            |              |            |             |            |            |
|--------------|------------|--------------|------------|-------------|------------|------------|
| NR3C2        | 267.858215 | -1.765867674 | 0.57310127 | -3.08124894 | 0.00206134 | 0.02657063 |
| GTDC1        | 186.943092 | -1.765477945 | 0.50406588 | -3.50247462 | 0.00046096 | 0.00986743 |
| CNST         | 84.2469317 | -1.758143867 | 0.5351162  | -3.28553664 | 0.00101788 | 0.01643027 |
| BMP6         | 30.2019564 | -1.757530591 | 0.50526171 | -3.47845593 | 0.00050431 | 0.0103981  |
| RGS10        | 468.848092 | -1.752600989 | 0.62352112 | -2.81081256 | 0.00494166 | 0.04739703 |
| NDUFB8       | 1347.28872 | -1.746590328 | 0.49820195 | -3.50578782 | 0.00045526 | 0.00979963 |
| PEG3         | 21.6662239 | -1.745410434 | 0.61960463 | -2.81697448 | 0.00484784 | 0.04689444 |
| RAPGEF2      | 81.1640073 | -1.741798917 | 0.41545554 | -4.1925038  | 2.76E-05   | 0.00145789 |
| KIAA0930     | 777.889729 | -1.741385974 | 0.58572754 | -2.97303073 | 0.00294875 | 0.03372248 |
| NET1         | 105.265622 | -1.741313559 | 0.57470835 | -3.02990825 | 0.00244628 | 0.02987449 |
| ZDHHC2       | 93.157112  | -1.73935593  | 0.60529076 | -2.87358747 | 0.00405839 | 0.04163439 |
| YWHAH        | 2833.66987 | -1.738645976 | 0.54816895 | -3.17173378 | 0.00151532 | 0.02159747 |
| PLEKHA6      | 46.9902388 | -1.736782503 | 0.61884178 | -2.80650492 | 0.00500821 | 0.04778992 |
| ATP6V1A      | 226.806429 | -1.736334379 | 0.50611854 | -3.4306872  | 0.00060205 | 0.01158869 |
| HIGD1A       | 375.015937 | -1.732053732 | 0.57718763 | -3.00085041 | 0.00269227 | 0.03163697 |
| SLC9A6       | 280.980092 | -1.732009269 | 0.44792897 | -3.86670515 | 0.00011032 | 0.00371492 |
| FANCB        | 55.8595902 | -1.72930636  | 0.49827554 | -3.47058249 | 0.00051933 | 0.01059082 |
| FBXL2        | 168.294687 | -1.72927237  | 0.51757982 | -3.34107378 | 0.00083455 | 0.01435393 |
| NUDT7        | 13.5757246 | -1.726188844 | 0.56245729 | -3.06901321 | 0.00214767 | 0.0274236  |
| KLRG1        | 39.7227987 | -1.721429311 | 0.51444506 | -3.34618687 | 0.00081931 | 0.01420817 |
| CLIC2        | 47.0650206 | -1.718008572 | 0.60148018 | -2.85630123 | 0.00428608 | 0.04323129 |
| TPK1         | 117.032118 | -1.715602675 | 0.58069012 | -2.95442028 | 0.00313257 | 0.03488896 |
| ISPD         | 103.89111  | -1.71213886  | 0.60320295 | -2.8384126  | 0.00453385 | 0.0447566  |
| IFIT2        | 399.641973 | -1.71070656  | 0.59657296 | -2.8675563  | 0.00413655 | 0.0422814  |
| NBEA         | 518.615721 | -1.709107994 | 0.60699128 | -2.81570438 | 0.00486704 | 0.04697633 |
| C17orf67     | 15.422613  | -1.708182848 | 0.56123055 | -3.04363837 | 0.00233736 | 0.02900288 |
| CPEB2        | 86.9334557 | -1.706644125 | 0.4354153  | -3.91957776 | 8.87E-05   | 0.00316473 |
| EIF4E3       | 487.194991 | -1.70603874  | 0.55361505 | -3.08163361 | 0.00205868 | 0.02656995 |
| DNAJC28      | 14.5811721 | -1.702899335 | 0.6008053  | -2.83436135 | 0.00459174 | 0.04512255 |
| SFMBT2       | 1053.0167  | -1.702328664 | 0.51213079 | -3.32401153 | 0.00088733 | 0.01492554 |
| TARSL2       | 569.427968 | -1.698743264 | 0.47062807 | -3.60952392 | 0.00030676 | 0.00763672 |
| ITIH5        | 110.619257 | -1.696819049 | 0.60578782 | -2.80101214 | 0.00509426 | 0.04830923 |
| LANCL1       | 1390.91681 | -1.695851836 | 0.48647863 | -3.48597394 | 0.00049035 | 0.01024853 |
| GPR155       | 266.844462 | -1.693132335 | 0.50881143 | -3.32762244 | 0.0008759  | 0.01480393 |
| SLC13A3      | 87.5766475 | -1.690968401 | 0.55972066 | -3.0210934  | 0.00251864 | 0.03035696 |
| TPRG1L       | 481.266021 | -1.681863282 | 0.5092059  | -3.30291396 | 0.00095686 | 0.01564758 |
| NDRG3        | 206.343549 | -1.679710205 | 0.43924451 | -3.8240892  | 0.00013126 | 0.00417733 |
| ZDHHC21      | 149.630784 | -1.679252678 | 0.54885998 | -3.05952839 | 0.00221686 | 0.02803016 |
| LOC150568    | 90.0121993 | -1.677371476 | 0.56660125 | -2.96040908 | 0.00307231 | 0.03448701 |
| CAMTA1       | 301.867129 | -1.675330001 | 0.51250872 | -3.26888098 | 0.00107974 | 0.01714925 |
| FRA10AC1     | 54.8304359 | -1.672398823 | 0.47116104 | -3.54952699 | 0.00038592 | 0.00883524 |
| PRELP        | 93.2794991 | -1.669001856 | 0.46404381 | -3.59664716 | 0.00032235 | 0.00788368 |
| SESN1        | 400.697144 | -1.664040708 | 0.42373751 | -3.92705551 | 8.60E-05   | 0.00310755 |
| NIPA1        | 168.259303 | -1.661530068 | 0.47218804 | -3.51878894 | 0.00043352 | 0.00956023 |
| USMG5        | 636.597057 | -1.659909464 | 0.55140017 | -3.01035355 | 0.00260944 | 0.03105452 |
| PBLD         | 39.9323404 | -1.657561594 | 0.47575604 | -3.4840579  | 0.00049387 | 0.01030645 |
| DKFZP434H168 | 56.8040465 | -1.656112295 | 0.48000921 | -3.45016778 | 0.00056024 | 0.01106257 |
| USP46        | 164.447873 | -1.655633868 | 0.46739223 | -3.54227942 | 0.00039669 | 0.00899581 |

|           |            |              |            |             |            |            |
|-----------|------------|--------------|------------|-------------|------------|------------|
| PLCB1     | 196.728474 | -1.646557671 | 0.51711447 | -3.1841261  | 0.00145192 | 0.02101466 |
| LOC646214 | 34.732131  | -1.641489415 | 0.56215459 | -2.91999649 | 0.00350035 | 0.03760866 |
| ASAH2B    | 53.2603596 | -1.640275285 | 0.56224839 | -2.9173499  | 0.0035302  | 0.03780841 |
| RND1      | 62.5285993 | -1.640145544 | 0.56717378 | -2.89178661 | 0.00383058 | 0.03979105 |
| SPTLC2    | 618.562687 | -1.639946654 | 0.45390757 | -3.61295285 | 0.00030273 | 0.00754758 |
| FGD4      | 163.448589 | -1.636003832 | 0.5233211  | -3.12619502 | 0.00177084 | 0.02403445 |
| C3orf14   | 112.873777 | -1.635237511 | 0.42566502 | -3.84160653 | 0.00012223 | 0.00396644 |
| MFSD6     | 102.6791   | -1.630797404 | 0.57535135 | -2.83443743 | 0.00459064 | 0.04512255 |
| MAP2K6    | 39.0182577 | -1.630130288 | 0.53000507 | -3.07568809 | 0.00210017 | 0.02696591 |
| UBR3      | 470.882232 | -1.629930372 | 0.46355025 | -3.51618917 | 0.00043779 | 0.0095914  |
| SECISBP2L | 254.0217   | -1.629215586 | 0.47104603 | -3.45871841 | 0.00054275 | 0.01084471 |
| FAM49B    | 356.327266 | -1.626590436 | 0.53632855 | -3.03282465 | 0.00242276 | 0.02965194 |
| MBNL2     | 3543.39177 | -1.62388505  | 0.53106444 | -3.05779288 | 0.00222974 | 0.0281295  |
| PPP1R12B  | 130.843361 | -1.623707615 | 0.40408227 | -4.01825997 | 5.86E-05   | 0.0023973  |
| EXOSC1    | 799.829938 | -1.623609965 | 0.50730405 | -3.2004672  | 0.00137205 | 0.02022272 |
| TMEM62    | 102.584806 | -1.623600983 | 0.51267882 | -3.16689693 | 0.00154075 | 0.0218123  |
| FAM174B   | 66.5989318 | -1.622740652 | 0.46355189 | -3.5006667  | 0.0004641  | 0.00989203 |
| LARGE     | 121.708247 | -1.620795433 | 0.52940123 | -3.06156338 | 0.00220184 | 0.02788228 |
| MLLT11    | 1494.89828 | -1.619815971 | 0.55833338 | -2.9011627  | 0.00371781 | 0.0390707  |
| RNF13     | 865.817667 | -1.617476792 | 0.51303904 | -3.15273626 | 0.00161748 | 0.02270686 |
| FAM47E    | 32.8238414 | -1.617361837 | 0.53702397 | -3.01171256 | 0.00259778 | 0.03100562 |
| FBXL17    | 291.519793 | -1.616911811 | 0.53488781 | -3.02289895 | 0.00250366 | 0.03024549 |
| OAT       | 499.664894 | -1.616026137 | 0.40943871 | -3.94693047 | 7.92E-05   | 0.00293226 |
| BTRC      | 181.281718 | -1.61168114  | 0.35454356 | -4.54579156 | 5.47E-06   | 0.00044428 |
| RNASEH2B  | 80.4086765 | -1.608913534 | 0.52646836 | -3.05604981 | 0.00224274 | 0.02827232 |
| RAPGEF5   | 309.175763 | -1.606049782 | 0.56051592 | -2.86530627 | 0.00416606 | 0.04245391 |
| MOB3B     | 115.386    | -1.60329786  | 0.44070226 | -3.63805227 | 0.00027471 | 0.0070656  |
| HBS1L     | 254.613134 | -1.599436073 | 0.46896294 | -3.41058094 | 0.00064825 | 0.01222474 |
| RTN4      | 4317.80163 | -1.597891583 | 0.47195998 | -3.38565057 | 0.0007101  | 0.01304096 |
| CISD1     | 398.25923  | -1.597075068 | 0.4745229  | -3.36564381 | 0.00076365 | 0.013637   |
| NTM       | 338.188985 | -1.590948288 | 0.53523442 | -2.97243271 | 0.0029545  | 0.03375079 |
| RASSF2    | 679.836945 | -1.584896364 | 0.55396771 | -2.86099053 | 0.0042232  | 0.04290604 |
| SNORA70E  | 16.2046041 | -1.579091701 | 0.55556367 | -2.84232356 | 0.0044786  | 0.04446909 |
| SUGT1P3   | 25.8588653 | -1.574679414 | 0.50431872 | -3.1223894  | 0.00179389 | 0.02419311 |
| DNER      | 1287.26581 | -1.570289142 | 0.49682552 | -3.16064508 | 0.0015742  | 0.02217342 |
| AKAP11    | 681.375746 | -1.569779846 | 0.4609256  | -3.40571197 | 0.00065992 | 0.01234884 |
| FBXO15    | 26.2304894 | -1.568992657 | 0.50801828 | -3.08845711 | 0.00201199 | 0.02612785 |
| EFHB      | 38.8886646 | -1.568120839 | 0.46476808 | -3.3739857  | 0.00074088 | 0.01341572 |
| MAOA      | 267.30566  | -1.566535398 | 0.5285089  | -2.96406624 | 0.00303603 | 0.03423989 |
| BBIP1     | 42.2757874 | -1.565840109 | 0.51416421 | -3.04540862 | 0.00232364 | 0.02888055 |
| ELOVL1    | 488.091881 | -1.5650523   | 0.56022772 | -2.79360024 | 0.00521249 | 0.04898805 |
| FAM217B   | 396.4263   | -1.562098517 | 0.39239418 | -3.98094214 | 6.86E-05   | 0.00265777 |
| PXK       | 528.486156 | -1.560215191 | 0.51017915 | -3.0581712  | 0.00222692 | 0.02811511 |
| WDR17     | 186.021282 | -1.555578518 | 0.47823195 | -3.25276997 | 0.00114286 | 0.01776465 |
| CPOX      | 100.450839 | -1.551971022 | 0.47340851 | -3.27829138 | 0.00104438 | 0.01674588 |
| PARP8     | 98.9807446 | -1.550572932 | 0.44622288 | -3.47488438 | 0.00051107 | 0.01050246 |
| GPR180    | 68.8481994 | -1.549686329 | 0.54774393 | -2.82921678 | 0.00466621 | 0.04550839 |
| SYNDIG1   | 147.051646 | -1.548565194 | 0.4492358  | -3.44710992 | 0.00056662 | 0.01112319 |



|          |            |              |            |             |            |            |
|----------|------------|--------------|------------|-------------|------------|------------|
| WDR47    | 486.411683 | -1.539843302 | 0.38228373 | -4.02801156 | 5.63E-05   | 0.00233391 |
| CAHM     | 275.991804 | -1.539123331 | 0.51903672 | -2.96534577 | 0.00302343 | 0.03416658 |
| NAPG     | 618.127872 | -1.538083589 | 0.39921916 | -3.85272991 | 0.00011681 | 0.00387149 |
| EPB41L1  | 740.035097 | -1.537513736 | 0.47183358 | -3.25859326 | 0.00111966 | 0.01757423 |
| ZNF323   | 103.544251 | -1.536385323 | 0.48826727 | -3.14660725 | 0.00165177 | 0.02309175 |
| PSTK     | 27.0957217 | -1.534886538 | 0.54910103 | -2.79527166 | 0.00518561 | 0.04881738 |
| GCA      | 31.7485692 | -1.530850748 | 0.52305674 | -2.92673936 | 0.00342536 | 0.03699211 |
| NEK7     | 444.843367 | -1.524914587 | 0.52422156 | -2.90891239 | 0.00362688 | 0.03841751 |
| SAMHD1   | 85.5271397 | -1.520361492 | 0.53675591 | -2.83250072 | 0.00461855 | 0.0451976  |
| CTTNBP2  | 203.682215 | -1.519292769 | 0.43986379 | -3.45400739 | 0.00055232 | 0.01095052 |
| MYCBP2   | 279.948512 | -1.518956209 | 0.51816746 | -2.93140025 | 0.00337438 | 0.03665354 |
| ZMYND11  | 966.611723 | -1.518058978 | 0.35375669 | -4.29125168 | 1.78E-05   | 0.00106247 |
| LRRC8C   | 140.42226  | -1.514947552 | 0.42300243 | -3.58141573 | 0.00034174 | 0.00814257 |
| STAM     | 116.64766  | -1.51302638  | 0.51095151 | -2.96119367 | 0.00306449 | 0.03446835 |
| LMBRD2   | 94.2109062 | -1.511572619 | 0.44699235 | -3.38165213 | 0.00072051 | 0.01317484 |
| FDFT1    | 817.014235 | -1.508505748 | 0.48197237 | -3.12985936 | 0.0017489  | 0.0238931  |
| ZNF195   | 60.3606761 | -1.508060659 | 0.45171991 | -3.33848618 | 0.00084236 | 0.01441647 |
| ADAM22   | 101.580164 | -1.503118081 | 0.4422844  | -3.3985329  | 0.00067748 | 0.01256559 |
| FAM169A  | 420.131667 | -1.502107029 | 0.4193711  | -3.58180865 | 0.00034122 | 0.00814257 |
| GSTM3    | 231.432978 | -1.498490929 | 0.4982223  | -3.00767537 | 0.00263254 | 0.03121894 |
| WDR67    | 46.7759527 | -1.494139578 | 0.47432578 | -3.1500282  | 0.00163255 | 0.02288017 |
| PARG     | 137.698367 | -1.493513805 | 0.44169165 | -3.3813494  | 0.00072131 | 0.01317484 |
| ICA1L    | 40.8973648 | -1.490509081 | 0.51308079 | -2.90501831 | 0.00367232 | 0.03876231 |
| TSPYL1   | 937.785317 | -1.488142189 | 0.50450102 | -2.94973079 | 0.00318051 | 0.0352309  |
| SCAMP1   | 95.7016483 | -1.48475478  | 0.50483478 | -2.94107068 | 0.0032708  | 0.0359467  |
| YWHAB    | 730.950877 | -1.482482061 | 0.42332982 | -3.50195516 | 0.00046186 | 0.00987371 |
| INPP5A   | 120.27976  | -1.481716958 | 0.44592068 | -3.32282632 | 0.0008911  | 0.01497411 |
| CDC42SE2 | 597.841444 | -1.480162254 | 0.3299766  | -4.48565817 | 7.27E-06   | 0.00054288 |
| TLR4     | 222.292493 | -1.478353412 | 0.52627507 | -2.80908883 | 0.00496819 | 0.04757133 |
| CLASP2   | 917.543144 | -1.473779783 | 0.50252685 | -2.93273839 | 0.00335987 | 0.0365504  |
| SPATA7   | 188.767781 | -1.467844765 | 0.5185867  | -2.83047128 | 0.00464795 | 0.04538299 |
| FOXP1    | 217.686065 | -1.466749867 | 0.52252177 | -2.80705985 | 0.0049996  | 0.04776366 |
| RARB     | 75.431611  | -1.46272917  | 0.46932464 | -3.11666817 | 0.00182907 | 0.02446872 |
| RTN4IP1  | 72.4574105 | -1.459384185 | 0.44154182 | -3.30520035 | 0.00094909 | 0.01560015 |
| MFAP3L   | 310.047762 | -1.459173468 | 0.47205656 | -3.09109883 | 0.00199417 | 0.0259768  |
| TAF9B    | 183.607561 | -1.45754309  | 0.51463598 | -2.83218266 | 0.00462314 | 0.0451976  |
| ATP6V1B2 | 977.738153 | -1.456961043 | 0.46578851 | -3.12794543 | 0.00176033 | 0.02395187 |
| FAM8A1   | 25.1952581 | -1.45649498  | 0.45811625 | -3.17931308 | 0.00147625 | 0.02120242 |
| SORT1    | 2529.3255  | -1.455712674 | 0.41848191 | -3.47855575 | 0.00050412 | 0.0103981  |
| INPP1    | 273.695127 | -1.454245808 | 0.46937003 | -3.09829284 | 0.00194639 | 0.02557243 |
| CCP110   | 485.0071   | -1.453146081 | 0.44406425 | -3.27237801 | 0.00106647 | 0.01703512 |
| TBCEL    | 233.008853 | -1.452648271 | 0.49625404 | -2.92722707 | 0.00341999 | 0.03695789 |
| CASD1    | 76.8642512 | -1.449912971 | 0.48233046 | -3.00605726 | 0.00264659 | 0.03127227 |
| ACYP2    | 414.684632 | -1.442903242 | 0.32465646 | -4.44440028 | 8.81E-06   | 0.00063024 |
| PPA1     | 1978.8844  | -1.440467816 | 0.44525241 | -3.23517132 | 0.0012157  | 0.01857144 |
| TPMT     | 99.2614335 | -1.440266491 | 0.41056794 | -3.50798579 | 0.00045151 | 0.00977144 |
| EVI5     | 206.726457 | -1.427154218 | 0.40671804 | -3.50895233 | 0.00044988 | 0.00975446 |
| SORL1    | 421.971255 | -1.425805753 | 0.38630527 | -3.69087829 | 0.00022348 | 0.00614802 |

|           |            |              |            |             |            |            |
|-----------|------------|--------------|------------|-------------|------------|------------|
| ACSL4     | 409.351338 | -1.419809556 | 0.47825968 | -2.96870011 | 0.00299062 | 0.03393277 |
| DIXDC1    | 61.2478637 | -1.419763986 | 0.48410053 | -2.93278752 | 0.00335934 | 0.0365504  |
| RAB30     | 198.250329 | -1.414778759 | 0.36888034 | -3.83533248 | 0.00012539 | 0.0040444  |
| NDUFB1    | 903.491761 | -1.414371219 | 0.475932   | -2.97179266 | 0.00296067 | 0.0337753  |
| JAK2      | 122.679399 | -1.414026211 | 0.46318959 | -3.05280219 | 0.00226715 | 0.0285159  |
| GPAM      | 148.825114 | -1.41101699  | 0.41372867 | -3.41048883 | 0.00064847 | 0.01222474 |
| ZNF652    | 418.340734 | -1.410498395 | 0.44747518 | -3.15212652 | 0.00162086 | 0.02273534 |
| USP31     | 250.559727 | -1.4087209   | 0.39684328 | -3.54981667 | 0.0003855  | 0.00883524 |
| GDPD1     | 127.971419 | -1.406795424 | 0.44449093 | -3.16495868 | 0.00155105 | 0.021884   |
| PPP3R1    | 1166.29849 | -1.400506387 | 0.43849106 | -3.19392233 | 0.00140354 | 0.02056239 |
| FAM190B   | 467.272985 | -1.399765099 | 0.31600033 | -4.42963179 | 9.44E-06   | 0.00065545 |
| AMOT      | 170.402145 | -1.397986503 | 0.4553696  | -3.07000405 | 0.00214056 | 0.02737439 |
| KIFAP3    | 125.939797 | -1.395744678 | 0.4345697  | -3.21178551 | 0.00131913 | 0.01966384 |
| RCBTB1    | 326.003847 | -1.394630446 | 0.48984371 | -2.8470927  | 0.00441205 | 0.04405235 |
| ZNF25     | 259.536956 | -1.3931245   | 0.43966876 | -3.16857741 | 0.00153187 | 0.02175954 |
| OXCT1     | 246.574754 | -1.389149896 | 0.45590588 | -3.04701025 | 0.0023113  | 0.02876967 |
| ERCC6     | 50.2909619 | -1.382059938 | 0.45926669 | -3.00927539 | 0.00261872 | 0.03108286 |
| WDR7      | 172.480766 | -1.377826138 | 0.39365122 | -3.50011908 | 0.00046505 | 0.00989203 |
| MUDENG    | 171.501398 | -1.377705467 | 0.48540293 | -2.83827182 | 0.00453585 | 0.0447566  |
| MEGF9     | 370.760756 | -1.3764217   | 0.42879644 | -3.20996532 | 0.00132751 | 0.01970625 |
| MITD1     | 578.343279 | -1.375919651 | 0.46819957 | -2.93874611 | 0.00329543 | 0.03602888 |
| IKZF5     | 260.135929 | -1.3675011   | 0.4384056  | -3.11926008 | 0.00181306 | 0.02433437 |
| ARHGAP5   | 796.514111 | -1.357927342 | 0.48693053 | -2.78874963 | 0.0052912  | 0.04945119 |
| KIAA1279  | 339.125629 | -1.355992916 | 0.3432963  | -3.94991995 | 7.82E-05   | 0.00291932 |
| PPM1L     | 163.695932 | -1.350921211 | 0.39980741 | -3.37892988 | 0.00072769 | 0.01321949 |
| VRK1      | 179.115404 | -1.347315153 | 0.40604419 | -3.31814908 | 0.00090616 | 0.01516646 |
| ZNF720    | 29.3785087 | -1.347240922 | 0.46532227 | -2.89528569 | 0.00378814 | 0.03951884 |
| APC       | 778.915153 | -1.343899297 | 0.45460171 | -2.95621257 | 0.00311442 | 0.03478474 |
| HDX       | 30.667147  | -1.342695187 | 0.48024046 | -2.79588105 | 0.00517584 | 0.04875274 |
| BLOC1S2   | 324.734377 | -1.341932543 | 0.42072301 | -3.18958674 | 0.00142476 | 0.02076473 |
| C12orf29  | 159.003771 | -1.34146738  | 0.37942579 | -3.53551976 | 0.00040697 | 0.00914276 |
| BRMS1L    | 81.9179919 | -1.337550214 | 0.45526609 | -2.93795266 | 0.00330387 | 0.03609773 |
| STAU2     | 259.003812 | -1.336284895 | 0.43195531 | -3.09357213 | 0.00197762 | 0.02588487 |
| KIF1B     | 971.435997 | -1.329750063 | 0.42885769 | -3.1006791  | 0.00193077 | 0.02546682 |
| ULK2      | 287.419337 | -1.329463801 | 0.36939207 | -3.59905882 | 0.00031937 | 0.00785611 |
| PDCD4     | 1032.844   | -1.329348995 | 0.35550844 | -3.73928955 | 0.00018454 | 0.0053374  |
| GHITM     | 659.67725  | -1.326917516 | 0.42685226 | -3.10861071 | 0.00187969 | 0.02496944 |
| CCDC66    | 291.704452 | -1.326640382 | 0.43649839 | -3.03927895 | 0.00237145 | 0.02921545 |
| DZIP3     | 567.61758  | -1.321670113 | 0.47446411 | -2.78560609 | 0.00534278 | 0.04976718 |
| ZFYVE16   | 309.661117 | -1.320203334 | 0.42233223 | -3.12598289 | 0.00177212 | 0.02403445 |
| GPR21     | 127.713391 | -1.317795474 | 0.3805287  | -3.46306465 | 0.00053406 | 0.01074772 |
| LOC283624 | 221.13916  | -1.315695778 | 0.4641005  | -2.8349372  | 0.00458347 | 0.04512029 |
| FBXO33    | 41.8742873 | -1.315083641 | 0.46070179 | -2.85452254 | 0.00431016 | 0.04336999 |
| CTAGE5    | 161.610584 | -1.313129597 | 0.41136091 | -3.19215941 | 0.00141213 | 0.02067029 |
| IDE       | 126.064912 | -1.312690847 | 0.43504753 | -3.01735044 | 0.00254995 | 0.03067239 |
| SLC12A6   | 82.8526572 | -1.311166006 | 0.3456347  | -3.79350223 | 0.00014854 | 0.00455478 |
| SERINC1   | 2098.39128 | -1.309274296 | 0.45665112 | -2.86712159 | 0.00414224 | 0.04229853 |
| TMCC3     | 245.309345 | -1.308834608 | 0.42041924 | -3.11316532 | 0.00185092 | 0.02468485 |

|           |            |              |            |             |            |            |
|-----------|------------|--------------|------------|-------------|------------|------------|
| ATP6V1E1  | 1482.56758 | -1.308333359 | 0.46874311 | -2.79115218 | 0.00525208 | 0.04920465 |
| FSD1L     | 106.648154 | -1.305980364 | 0.41761004 | -3.12727239 | 0.00176436 | 0.02398735 |
| STX7      | 886.626431 | -1.298553765 | 0.43741377 | -2.96870799 | 0.00299055 | 0.03393277 |
| ZNF624    | 74.6935391 | -1.297550134 | 0.43743111 | -2.96629595 | 0.0030141  | 0.03410706 |
| DTNB      | 284.325858 | -1.296605911 | 0.40622049 | -3.19187721 | 0.00141351 | 0.02067249 |
| BTBD3     | 684.030117 | -1.283086316 | 0.44049934 | -2.91279962 | 0.00358204 | 0.03821756 |
| PPP2R2D   | 32.4887763 | -1.282877211 | 0.45139662 | -2.84201778 | 0.0044829  | 0.04446909 |
| ASF1A     | 175.635484 | -1.281444899 | 0.41336263 | -3.10005023 | 0.00193488 | 0.02548095 |
| STRN      | 251.810031 | -1.280416737 | 0.44364009 | -2.88616103 | 0.00389973 | 0.0403516  |
| DCUN1D1   | 598.110087 | -1.280306551 | 0.42181075 | -3.03526296 | 0.00240326 | 0.02952075 |
| LMBRD1    | 162.939408 | -1.273132231 | 0.45283368 | -2.81147866 | 0.00493144 | 0.04737744 |
| GPR137C   | 85.8564512 | -1.261031517 | 0.40327079 | -3.1270093  | 0.00176594 | 0.02398942 |
| C14orf129 | 175.507831 | -1.26087474  | 0.45166318 | -2.79162613 | 0.00524439 | 0.04920465 |
| TEX2      | 334.858078 | -1.2524702   | 0.42144595 | -2.97184064 | 0.0029602  | 0.0337753  |
| SSH2      | 331.696796 | -1.25155026  | 0.40596983 | -3.0828652  | 0.00205018 | 0.02650094 |
| SCLT1     | 62.911419  | -1.249956491 | 0.38429    | -3.25263863 | 0.00114339 | 0.01776465 |
| MYLIP     | 47.0677198 | -1.231833392 | 0.38488571 | -3.20051732 | 0.00137181 | 0.02022272 |
| USP45     | 72.108456  | -1.230812071 | 0.37464496 | -3.28527591 | 0.00101883 | 0.01643027 |
| ZNF706    | 347.347012 | -1.229290828 | 0.43691397 | -2.81357636 | 0.00489937 | 0.04718    |
| LYPLAL1   | 266.663445 | -1.222558928 | 0.41477892 | -2.9474953  | 0.0032036  | 0.0354166  |
| RUFY2     | 313.965895 | -1.219098821 | 0.36355746 | -3.35324939 | 0.00079869 | 0.0139368  |
| PREX2     | 87.4044928 | -1.198866906 | 0.38585918 | -3.10700629 | 0.00188992 | 0.02508553 |
| HERC3     | 196.22708  | -1.195289202 | 0.37798341 | -3.16227954 | 0.00156539 | 0.02206783 |
| RAB11FIP2 | 206.475823 | -1.194518918 | 0.41762759 | -2.86024907 | 0.00423308 | 0.04298051 |
| SAMD8     | 367.862983 | -1.193414703 | 0.35745288 | -3.338663   | 0.00084183 | 0.01441647 |
| RNF141    | 621.245209 | -1.192441692 | 0.35215196 | -3.38615662 | 0.00070879 | 0.01303117 |
| FAM135A   | 367.29349  | -1.191354889 | 0.398977   | -2.98602396 | 0.0028263  | 0.03259659 |
| MTX2      | 262.781178 | -1.188613972 | 0.39332326 | -3.02197729 | 0.00251129 | 0.03031594 |
| ALG14     | 71.2155705 | -1.187571294 | 0.41556632 | -2.85771787 | 0.004267   | 0.04314236 |
| USP25     | 335.910189 | -1.187080151 | 0.41675698 | -2.84837499 | 0.00439431 | 0.04395358 |
| BMI1      | 144.774705 | -1.186644937 | 0.40578834 | -2.92429532 | 0.00345237 | 0.03718823 |
| PITHD1    | 291.189653 | -1.18508862  | 0.32721192 | -3.62177708 | 0.00029259 | 0.00738038 |
| GPHN      | 293.263863 | -1.184728999 | 0.39804528 | -2.97636739 | 0.00291685 | 0.03349397 |
| RNPC3     | 559.976696 | -1.183805613 | 0.41243972 | -2.87025126 | 0.00410146 | 0.0419482  |
| C6orf225  | 365.818215 | -1.176276342 | 0.31785137 | -3.70071187 | 0.000215   | 0.00599135 |
| WDR44     | 158.70215  | -1.168172402 | 0.40312066 | -2.89782323 | 0.00375762 | 0.0393415  |
| TRIM36    | 95.7169378 | -1.163170346 | 0.35677007 | -3.26028008 | 0.00111302 | 0.01754333 |
| CD99L2    | 385.017049 | -1.15712339  | 0.33190807 | -3.48627671 | 0.00048979 | 0.01024853 |
| RAB18     | 466.921069 | -1.155345535 | 0.36333897 | -3.17980077 | 0.00147376 | 0.02118996 |
| VPS26A    | 189.811227 | -1.151970289 | 0.41083821 | -2.8039512  | 0.00504805 | 0.04806091 |
| ANXA7     | 583.018282 | -1.151578381 | 0.36678263 | -3.13967536 | 0.00169135 | 0.02344707 |
| TATDN3    | 341.446619 | -1.150833173 | 0.37751995 | -3.04840361 | 0.00230061 | 0.02875397 |
| WAPAL     | 185.073037 | -1.147395791 | 0.41150508 | -2.78829072 | 0.0052987  | 0.04946628 |
| HSD17B4   | 2627.83272 | -1.147318018 | 0.39924025 | -2.87375338 | 0.00405626 | 0.04163439 |
| LYRM7     | 59.1516616 | -1.146370022 | 0.33270626 | -3.4459201  | 0.00056981 | 0.01114678 |
| UBE4B     | 213.206605 | -1.145842884 | 0.36004416 | -3.18250651 | 0.00146006 | 0.02107808 |
| FAM149B1  | 152.404816 | -1.143432298 | 0.35836766 | -3.19066818 | 0.00141944 | 0.02073933 |
| ZRANB1    | 302.729424 | -1.141970737 | 0.34503943 | -3.30968181 | 0.00093402 | 0.01547859 |

|             |            |              |            |             |            |            |
|-------------|------------|--------------|------------|-------------|------------|------------|
| MAT2B       | 570.208762 | -1.141578535 | 0.39251878 | -2.90834121 | 0.00363352 | 0.03842518 |
| SIRT5       | 23.1096624 | -1.140572403 | 0.38223626 | -2.98394608 | 0.00284557 | 0.03277378 |
| PIK3IP1     | 105.197545 | -1.138640427 | 0.39145047 | -2.90877265 | 0.00362851 | 0.03841751 |
| SLC25A26    | 21.1513686 | -1.120951302 | 0.39267381 | -2.85466278 | 0.00430825 | 0.04336999 |
| DBT         | 134.305159 | -1.118665302 | 0.37337771 | -2.99606879 | 0.00273485 | 0.03191415 |
| RASAL2      | 275.013801 | -1.115707862 | 0.38426633 | -2.90347547 | 0.00369046 | 0.03888402 |
| CHUK        | 107.09897  | -1.115099641 | 0.39973528 | -2.78959525 | 0.0052774  | 0.04934968 |
| PLEKHM3     | 341.165072 | -1.103905987 | 0.36940373 | -2.98834551 | 0.00280492 | 0.03241673 |
| FRG1        | 138.883329 | -1.102594281 | 0.34675706 | -3.17973129 | 0.00147412 | 0.02118996 |
| KIAA0232    | 172.815626 | -1.101390158 | 0.32078898 | -3.43337906 | 0.00059611 | 0.01152704 |
| MAN1A2      | 257.928187 | -1.100851122 | 0.36059909 | -3.0528394  | 0.00226687 | 0.0285159  |
| MICU1       | 467.902305 | -1.093181528 | 0.27623261 | -3.95746728 | 7.57E-05   | 0.00285399 |
| ISCA1       | 89.3985261 | -1.09117224  | 0.30834508 | -3.53880214 | 0.00040195 | 0.00905404 |
| HERC4       | 119.542673 | -1.089149458 | 0.38269269 | -2.84601588 | 0.004427   | 0.04417347 |
| NT5C2       | 279.086763 | -1.078326861 | 0.27015311 | -3.99153973 | 6.56E-05   | 0.00257461 |
| RPS10-NUDT3 | 948.533442 | -1.076674196 | 0.33213347 | -3.24169135 | 0.00118823 | 0.01830152 |
| HINT3       | 280.507191 | -1.076324748 | 0.37846356 | -2.84393233 | 0.00445605 | 0.04432223 |
| CSRP2BP     | 116.224794 | -1.074102816 | 0.32851816 | -3.26953864 | 0.00107723 | 0.01714183 |
| KIAA0430    | 145.75185  | -1.072864755 | 0.37587514 | -2.85431152 | 0.00431302 | 0.04337284 |
| TRMT1L      | 92.9625532 | -1.071168193 | 0.36183003 | -2.9604182  | 0.00307222 | 0.03448701 |
| FTO         | 3629.02046 | -1.059135153 | 0.34803156 | -3.04321582 | 0.00234064 | 0.02900603 |
| COX5A       | 306.092536 | -1.052453987 | 0.37802094 | -2.78411558 | 0.00536739 | 0.04996877 |
| COMMD3      | 360.208217 | -1.051654915 | 0.37363031 | -2.8146938  | 0.00488237 | 0.04707397 |
| HDGFRP3     | 497.268876 | -1.04952334  | 0.37374493 | -2.80812726 | 0.00498305 | 0.04765807 |
| ZNF33A      | 321.791445 | -1.048480079 | 0.34408464 | -3.04715745 | 0.00231017 | 0.02876967 |
| ZC3H6       | 83.605361  | -1.044814511 | 0.36696172 | -2.84720297 | 0.00441052 | 0.04405235 |
| PPPDE2      | 71.9735871 | -1.043219697 | 0.32658778 | -3.1943011  | 0.0014017  | 0.02055335 |
| RNF170      | 188.737585 | -1.031901544 | 0.30506179 | -3.38259852 | 0.00071804 | 0.01315798 |
| C4orf34     | 463.49615  | -1.029982527 | 0.33396114 | -3.08413881 | 0.00204142 | 0.02642841 |
| KIAA1586    | 89.3215278 | -1.023509112 | 0.36442953 | -2.80852408 | 0.00497692 | 0.04762648 |
| EXOC6B      | 478.463104 | -1.020558669 | 0.31779755 | -3.21134844 | 0.00132114 | 0.01966384 |
| TAX1BP1     | 101.141909 | -1.013814133 | 0.34750394 | -2.91741768 | 0.00352943 | 0.03780841 |
| ASL         | 271.65917  | 1.00599442   | 0.36076739 | 2.788484925 | 0.00529552 | 0.04946411 |
| UBE2E1      | 523.117703 | 1.006286871  | 0.32406428 | 3.105207605 | 0.00190146 | 0.0251591  |
| GALNT2      | 941.026516 | 1.041665949  | 0.36866366 | 2.825518389 | 0.00472042 | 0.04590388 |
| PTPN12      | 779.881572 | 1.045756342  | 0.37136737 | 2.81596183  | 0.00486314 | 0.04697515 |
| TSPAN9      | 128.607506 | 1.057595195  | 0.3422435  | 3.090183456 | 0.00200033 | 0.02603141 |
| WDR1        | 718.528436 | 1.062526092  | 0.37811571 | 2.810055432 | 0.0049533  | 0.04748157 |
| ZSCAN22     | 38.8999401 | 1.076095115  | 0.35928369 | 2.995112626 | 0.00274344 | 0.03192568 |
| KXD1        | 481.859724 | 1.084433162  | 0.32183689 | 3.369511656 | 0.00075302 | 0.01354782 |
| ACP6        | 197.963044 | 1.089118945  | 0.36956807 | 2.947004997 | 0.00320868 | 0.03544948 |
| NOP16       | 68.3665511 | 1.092644639  | 0.36256776 | 3.013628824 | 0.00258143 | 0.03094039 |
| ILK         | 543.703302 | 1.094335653  | 0.34919263 | 3.133902507 | 0.00172498 | 0.02369516 |
| TBL2        | 130.104582 | 1.102542026  | 0.38996824 | 2.827261074 | 0.0046948  | 0.04568123 |
| CLPP        | 66.0738336 | 1.103842408  | 0.39535763 | 2.792009846 | 0.00523818 | 0.04920196 |
| DCPS        | 241.12317  | 1.108086385  | 0.3911157  | 2.833142195 | 0.00460929 | 0.0451976  |
| STAT3       | 1461.57147 | 1.108929169  | 0.36544963 | 3.034424134 | 0.00240995 | 0.02956898 |
| IRF3        | 267.525652 | 1.108969874  | 0.32017263 | 3.463662355 | 0.00053287 | 0.01074772 |

|              |            |             |            |             |            |            |
|--------------|------------|-------------|------------|-------------|------------|------------|
| CNTROB       | 49.9983655 | 1.109624248 | 0.36173462 | 3.067509145 | 0.00215851 | 0.02750054 |
| POLR2H       | 281.687832 | 1.111495541 | 0.38891808 | 2.857916894 | 0.00426432 | 0.04314127 |
| LRP1         | 2065.28123 | 1.114438949 | 0.38406959 | 2.90165888  | 0.00371192 | 0.03904999 |
| ZIK1         | 106.163404 | 1.11501725  | 0.37757698 | 2.953085889 | 0.00314614 | 0.03500978 |
| TMED9        | 466.314664 | 1.11822967  | 0.3464791  | 3.22740871  | 0.00124917 | 0.01896209 |
| SNX8         | 201.571126 | 1.142437604 | 0.40746631 | 2.803759679 | 0.00505105 | 0.04806224 |
| DGKD         | 271.88041  | 1.149572198 | 0.38159149 | 3.012572973 | 0.00259043 | 0.03095989 |
| RCN1         | 769.037051 | 1.154753982 | 0.34790332 | 3.319180729 | 0.00090282 | 0.01515041 |
| SUN1         | 943.661483 | 1.155189955 | 0.36923793 | 3.128578788 | 0.00175654 | 0.02394562 |
| DHR SX       | 337.084393 | 1.157342448 | 0.3989573  | 2.900918056 | 0.00372071 | 0.03907677 |
| DPP9         | 99.4861233 | 1.158582038 | 0.41077254 | 2.820495313 | 0.00479496 | 0.04649421 |
| ACTB         | 53930.0891 | 1.169238119 | 0.2966774  | 3.941109519 | 8.11E-05   | 0.00296817 |
| BCKDK        | 572.294148 | 1.172256501 | 0.33955254 | 3.452356786 | 0.00055571 | 0.01098611 |
| FYCO1        | 369.563476 | 1.172372674 | 0.42064434 | 2.787087709 | 0.00531841 | 0.04962273 |
| ECE1         | 1004.32847 | 1.179096032 | 0.39753826 | 2.965993815 | 0.00301707 | 0.03411761 |
| FIGN         | 115.440119 | 1.184467523 | 0.40075021 | 2.955625445 | 0.00312036 | 0.03479818 |
| TRPM4        | 18.8112218 | 1.189574723 | 0.40795076 | 2.915976238 | 0.00354578 | 0.0379028  |
| CHCHD3       | 396.827395 | 1.19735765  | 0.35534608 | 3.369553608 | 0.0007529  | 0.01354782 |
| CABIN1       | 255.346713 | 1.199429785 | 0.39561503 | 3.031810475 | 0.00243092 | 0.02970847 |
| PDIA6        | 1590.88631 | 1.202481682 | 0.27483003 | 4.375364993 | 1.21E-05   | 0.00079266 |
| CDC42EP3     | 68.0485633 | 1.211066073 | 0.37075311 | 3.266502773 | 0.00108885 | 0.01727761 |
| WTAP         | 194.073684 | 1.212817001 | 0.37053637 | 3.27313887  | 0.0010636  | 0.01702169 |
| DBF4         | 49.9345738 | 1.224144025 | 0.40746042 | 3.004326246 | 0.0026617  | 0.03140952 |
| RPL13AP5     | 14766.2347 | 1.225332747 | 0.42915887 | 2.855196152 | 0.00430103 | 0.04333    |
| TARS         | 383.182151 | 1.227808644 | 0.36883857 | 3.328850968 | 0.00087205 | 0.01480393 |
| FNBP4        | 184.728171 | 1.2307671   | 0.35761325 | 3.441614937 | 0.00057825 | 0.01124648 |
| CCNL2        | 342.15336  | 1.231451801 | 0.39820821 | 3.092482173 | 0.0019849  | 0.02591779 |
| PLEKHA8      | 259.63689  | 1.232648085 | 0.34040999 | 3.621069074 | 0.00029339 | 0.00738038 |
| EIF4A3       | 254.274789 | 1.234982247 | 0.40515861 | 3.048145156 | 0.00230259 | 0.02875397 |
| LYPD1        | 102.937278 | 1.235535194 | 0.37053304 | 3.334480452 | 0.00085459 | 0.0145792  |
| INPPL1       | 303.341475 | 1.238618206 | 0.38833014 | 3.189600992 | 0.00142469 | 0.02076473 |
| LOC100289561 | 412.255649 | 1.238781611 | 0.31200342 | 3.970410322 | 7.17E-05   | 0.00274814 |
| POLH         | 204.855394 | 1.242598314 | 0.44378252 | 2.800016343 | 0.00511    | 0.04835133 |
| MAD2L2       | 228.236032 | 1.243299278 | 0.40957519 | 3.035582502 | 0.00240072 | 0.02951106 |
| MANF         | 373.129452 | 1.249663226 | 0.35102252 | 3.560065634 | 0.00037076 | 0.0085935  |
| CD63         | 2878.68702 | 1.258329906 | 0.39981565 | 3.147275247 | 0.001648   | 0.02305824 |
| IPO4         | 104.807558 | 1.261169349 | 0.41588745 | 3.032477522 | 0.00242555 | 0.02966446 |
| RPL18A       | 2509.03666 | 1.263994096 | 0.37227937 | 3.395283766 | 0.00068558 | 0.01268767 |
| GMPPA        | 173.882095 | 1.264714679 | 0.43682532 | 2.89524126  | 0.00378867 | 0.03951884 |
| ELL          | 75.9540219 | 1.26476441  | 0.43323891 | 2.919323213 | 0.00350792 | 0.0376659  |
| EPAS1        | 155.362059 | 1.266511228 | 0.43674985 | 2.89985501  | 0.00373335 | 0.03918505 |
| RELB         | 107.685228 | 1.266980614 | 0.39376419 | 3.217612552 | 0.00129262 | 0.01941129 |
| EIF3B        | 456.317537 | 1.268034201 | 0.38986313 | 3.252511223 | 0.0011439  | 0.01776465 |
| ZNF473       | 93.0702174 | 1.270409114 | 0.40798304 | 3.113877242 | 0.00184646 | 0.02464493 |
| KIAA0754     | 672.833918 | 1.273359384 | 0.4249651  | 2.996385769 | 0.00273201 | 0.03190314 |
| PCDHB10      | 198.394302 | 1.273900129 | 0.43516202 | 2.927415677 | 0.00341792 | 0.03695789 |
| TRIO         | 548.456554 | 1.276381262 | 0.43828345 | 2.912227849 | 0.00358861 | 0.0382633  |
| POFUT1       | 170.268659 | 1.293628334 | 0.43905397 | 2.946399333 | 0.00321497 | 0.03549564 |

|           |            |             |            |             |            |            |
|-----------|------------|-------------|------------|-------------|------------|------------|
| FKBP9     | 954.72544  | 1.298683876 | 0.35331029 | 3.675760163 | 0.00023714 | 0.00636572 |
| TCEA3     | 402.159627 | 1.301980885 | 0.41096129 | 3.16813507  | 0.0015342  | 0.02177427 |
| POLD2     | 795.616593 | 1.303191247 | 0.43258269 | 3.012582996 | 0.00259035 | 0.03095989 |
| TTLL4     | 131.801654 | 1.305821623 | 0.39347002 | 3.318732214 | 0.00090427 | 0.01515041 |
| LGALS1    | 1478.57811 | 1.316570627 | 0.43951046 | 2.995538764 | 0.0027396  | 0.03192568 |
| C20orf20  | 78.6600496 | 1.324977531 | 0.47483108 | 2.790418738 | 0.00526399 | 0.04927917 |
| PTPN14    | 109.195876 | 1.326416807 | 0.40803999 | 3.250702952 | 0.0011512  | 0.01779648 |
| ATP13A3   | 698.940965 | 1.326916811 | 0.42945899 | 3.089740416 | 0.00200331 | 0.02603535 |
| BTG1      | 1188.122   | 1.331112352 | 0.46956936 | 2.834751313 | 0.00458614 | 0.04512029 |
| METTL1    | 80.1802285 | 1.334316617 | 0.41045486 | 3.250824277 | 0.00115071 | 0.01779648 |
| ZNF548    | 180.605297 | 1.335851142 | 0.44491487 | 3.00248707  | 0.00267783 | 0.03155562 |
| ZNF558    | 222.559612 | 1.342030815 | 0.43062632 | 3.116462619 | 0.00183035 | 0.02446872 |
| CALR      | 13170.189  | 1.343036145 | 0.35632819 | 3.769098769 | 0.00016384 | 0.00491631 |
| DDX41     | 239.680523 | 1.346143669 | 0.3809619  | 3.533538794 | 0.00041004 | 0.00916256 |
| PRR24     | 88.1513757 | 1.347884066 | 0.45397131 | 2.969095277 | 0.00298678 | 0.03393277 |
| FAM210A   | 73.2864508 | 1.347981771 | 0.43222773 | 3.118684144 | 0.00181661 | 0.02436253 |
| GRWD1     | 218.407105 | 1.354537573 | 0.44745507 | 3.027203565 | 0.00246828 | 0.03003398 |
| SHC1      | 498.039901 | 1.356991363 | 0.43516401 | 3.118344671 | 0.0018187  | 0.02437116 |
| PFKFB3    | 567.726719 | 1.365056088 | 0.46659412 | 2.925574967 | 0.0034382  | 0.03710698 |
| MYO9B     | 217.53604  | 1.365438329 | 0.47424051 | 2.879210652 | 0.00398672 | 0.04112513 |
| XBPI      | 600.293628 | 1.383388519 | 0.41549826 | 3.329468886 | 0.00087012 | 0.01479905 |
| SEC24D    | 313.932224 | 1.406993253 | 0.40878479 | 3.441892345 | 0.00057766 | 0.01124648 |
| OSBPL3    | 574.003135 | 1.408588272 | 0.44773055 | 3.146062476 | 0.00165485 | 0.02310861 |
| PTRF      | 844.534845 | 1.410223249 | 0.50604624 | 2.786747822 | 0.00532399 | 0.04964723 |
| MYH9      | 2694.18641 | 1.420257652 | 0.45674413 | 3.109525766 | 0.00187388 | 0.0249302  |
| SH3GL1    | 1171.08524 | 1.422450178 | 0.47807765 | 2.975353872 | 0.00292651 | 0.03352217 |
| ZNF90     | 141.122561 | 1.42338435  | 0.45578554 | 3.122925649 | 0.00179063 | 0.02416847 |
| RPL13AP20 | 64.8255174 | 1.42598818  | 0.50344757 | 2.832446245 | 0.00461933 | 0.0451976  |
| FLT4      | 77.1896087 | 1.42828912  | 0.4970176  | 2.873719395 | 0.00405669 | 0.04163439 |
| SETD5     | 624.944731 | 1.428796307 | 0.43222068 | 3.305710188 | 0.00094736 | 0.01560015 |
| TANC1     | 771.797086 | 1.434837622 | 0.48530083 | 2.956594226 | 0.00311057 | 0.03477714 |
| EPHA2     | 45.5787822 | 1.436665191 | 0.48432781 | 2.966307474 | 0.00301399 | 0.03410706 |
| MKNK2     | 428.439397 | 1.437771026 | 0.45919406 | 3.131074944 | 0.00174168 | 0.02381378 |
| TNS1      | 1678.06267 | 1.44109746  | 0.46118654 | 3.124760443 | 0.0017795  | 0.02407625 |
| ACLY      | 567.283014 | 1.441428443 | 0.40687406 | 3.542689499 | 0.00039607 | 0.00899397 |
| PATL1     | 552.490345 | 1.441926832 | 0.43557213 | 3.310420332 | 0.00093156 | 0.01547159 |
| C19orf10  | 200.010025 | 1.446702874 | 0.48881625 | 2.959604731 | 0.00308034 | 0.03453104 |
| PCK2      | 29.9009246 | 1.449235788 | 0.39568904 | 3.66256239  | 0.0002497  | 0.00658719 |
| RCN3      | 223.230334 | 1.449271872 | 0.51354865 | 2.8220732   | 0.00477143 | 0.04631952 |
| FERMT2    | 1557.92099 | 1.449372208 | 0.43101183 | 3.362720228 | 0.00077179 | 0.01367407 |
| TPM4      | 2294.41296 | 1.45344006  | 0.5108836  | 2.844953451 | 0.00444179 | 0.04424414 |
| HDAC7     | 318.004793 | 1.454332102 | 0.51879373 | 2.803295439 | 0.00505833 | 0.04807703 |
| MTMR11    | 97.5431523 | 1.455312867 | 0.51704598 | 2.814668171 | 0.00488276 | 0.04707397 |
| PLCB3     | 36.6416924 | 1.45776355  | 0.47772337 | 3.051480516 | 0.00227716 | 0.02859893 |
| RHOC      | 1196.04494 | 1.461707001 | 0.47137577 | 3.100937954 | 0.00192909 | 0.02546456 |
| NAB2      | 138.439841 | 1.46486695  | 0.47884769 | 3.059150079 | 0.00221966 | 0.02804448 |
| P4HA2     | 218.720582 | 1.469525545 | 0.52016118 | 2.825134963 | 0.00472607 | 0.04593227 |
| IRS2      | 617.445967 | 1.470292272 | 0.44433309 | 3.308986638 | 0.00093634 | 0.01550178 |

|              |            |             |            |             |            |            |
|--------------|------------|-------------|------------|-------------|------------|------------|
| ACSS3        | 176.74794  | 1.470834439 | 0.50518956 | 2.911450603 | 0.00359755 | 0.03829424 |
| CSRP2        | 517.919017 | 1.478505151 | 0.48182792 | 3.068533591 | 0.00215112 | 0.02744681 |
| LOC100129034 | 804.616332 | 1.479350425 | 0.4658577  | 3.175541413 | 0.00149557 | 0.02138858 |
| TRIM9        | 1472.24581 | 1.481388036 | 0.4943089  | 2.99688722  | 0.00272752 | 0.03187286 |
| STK40        | 328.517408 | 1.483341737 | 0.50364919 | 2.945188373 | 0.00322758 | 0.0355881  |
| NBPF16       | 1008.92003 | 1.486566389 | 0.43796745 | 3.394239465 | 0.00068819 | 0.01272214 |
| ARHGEF26     | 527.140639 | 1.489125388 | 0.36828426 | 4.043413051 | 5.27E-05   | 0.00224677 |
| FIBIN        | 411.182568 | 1.498960559 | 0.51500927 | 2.910550614 | 0.00360793 | 0.03832337 |
| DAPK3        | 773.337675 | 1.498970073 | 0.50976817 | 2.940493676 | 0.0032769  | 0.03599018 |
| FAM57A       | 41.7953641 | 1.500041025 | 0.52239494 | 2.871469261 | 0.00408569 | 0.04183781 |
| SLC3A2       | 1031.80275 | 1.510785561 | 0.41722084 | 3.621069236 | 0.00029339 | 0.00738038 |
| LTBP3        | 2338.38086 | 1.513093587 | 0.44331383 | 3.413143242 | 0.00064218 | 0.01215228 |
| ZYX          | 966.324553 | 1.513271709 | 0.52799424 | 2.866076173 | 0.00415594 | 0.04237649 |
| SPRY2        | 645.353935 | 1.514962191 | 0.51525391 | 2.940224557 | 0.00327974 | 0.03599793 |
| GSDMD        | 164.983511 | 1.515663358 | 0.46887755 | 3.232535543 | 0.00122697 | 0.0186899  |
| LPP          | 206.509032 | 1.521875066 | 0.52186047 | 2.916248978 | 0.00354268 | 0.03789379 |
| S100A6       | 197.54313  | 1.523247721 | 0.42109124 | 3.617381618 | 0.0002976  | 0.00746394 |
| ACTG1        | 51006.0174 | 1.525380613 | 0.44404202 | 3.43521678  | 0.00059208 | 0.01146234 |
| LAMB2        | 387.801172 | 1.530898891 | 0.54141373 | 2.827595246 | 0.00468991 | 0.04566001 |
| METRNL       | 128.110584 | 1.533059543 | 0.53743666 | 2.852539975 | 0.00433714 | 0.0435632  |
| GPRC5C       | 139.003025 | 1.533335862 | 0.49366854 | 3.106002774 | 0.00189635 | 0.02511131 |
| EYA2         | 118.818224 | 1.538600227 | 0.49012033 | 3.139229566 | 0.00169393 | 0.02344707 |
| SEMA5A       | 305.772149 | 1.539270414 | 0.49343689 | 3.119487903 | 0.00181166 | 0.02433437 |
| SEMA3F       | 23.5807184 | 1.549536217 | 0.44307369 | 3.497242647 | 0.00047009 | 0.00993643 |
| FDXR         | 62.2149972 | 1.551581925 | 0.41048122 | 3.779909646 | 0.00015689 | 0.00475866 |
| VGLL4        | 721.92336  | 1.552354195 | 0.5547191  | 2.798450944 | 0.00513484 | 0.04851936 |
| APP          | 2497.69735 | 1.555071618 | 0.44865009 | 3.466112352 | 0.00052804 | 0.01071646 |
| PDGFC        | 307.322518 | 1.559212095 | 0.47445006 | 3.286356588 | 0.00101492 | 0.01639884 |
| IRF1         | 131.305916 | 1.564716887 | 0.53035954 | 2.950294593 | 0.00317471 | 0.03521534 |
| CDCA7L       | 157.064028 | 1.567237922 | 0.48191532 | 3.252102324 | 0.00114555 | 0.01776465 |
| PGK1         | 6478.43656 | 1.571979164 | 0.52816027 | 2.976329837 | 0.00291721 | 0.03349397 |
| LAMC1        | 403.645502 | 1.574650451 | 0.53217642 | 2.958888068 | 0.00308751 | 0.03456533 |
| NOTCH3       | 246.475516 | 1.575224158 | 0.55470745 | 2.83973861  | 0.00451505 | 0.04462122 |
| CLIC1        | 1692.45328 | 1.579670431 | 0.54528199 | 2.896978909 | 0.00376775 | 0.03942297 |
| HSPB1        | 1033.92817 | 1.58160042  | 0.4226145  | 3.742418743 | 0.00018226 | 0.00530571 |
| PCDHB7       | 125.112272 | 1.584171629 | 0.56617165 | 2.798041232 | 0.00514135 | 0.04851936 |
| COL5A3       | 34.9352693 | 1.584217051 | 0.5444641  | 2.909681372 | 0.00361797 | 0.03840583 |
| SAMD4A       | 189.850398 | 1.59086523  | 0.50726021 | 3.13619163  | 0.00171157 | 0.02360385 |
| PGPEP1       | 512.445453 | 1.59483059  | 0.38476227 | 4.144976547 | 3.40E-05   | 0.00165052 |
| TLCD2        | 13.1317167 | 1.600458788 | 0.54556979 | 2.933554657 | 0.00335105 | 0.03651815 |
| TSR1         | 214.236203 | 1.601976113 | 0.52484995 | 3.052255454 | 0.00227129 | 0.02854653 |
| SLC12A4      | 290.12015  | 1.606336754 | 0.54450273 | 2.950098636 | 0.00317672 | 0.03521534 |
| C14orf43     | 200.015567 | 1.610989377 | 0.47793568 | 3.370724198 | 0.00074971 | 0.01351728 |
| DOK5         | 215.139975 | 1.615880278 | 0.49513556 | 3.263510893 | 0.00110041 | 0.01742816 |
| USP36        | 999.375748 | 1.616377138 | 0.50123211 | 3.224807634 | 0.00126057 | 0.01908349 |
| LDHA         | 2069.07935 | 1.61866322  | 0.53745948 | 3.011693492 | 0.00259795 | 0.03100562 |
| C1S          | 254.6643   | 1.619468367 | 0.54419404 | 2.975902431 | 0.00292128 | 0.03349397 |
| CDR2         | 129.662509 | 1.620323394 | 0.49224721 | 3.291686291 | 0.00099589 | 0.01613778 |

|              |            |             |            |             |            |            |
|--------------|------------|-------------|------------|-------------|------------|------------|
| TPM2         | 1334.24016 | 1.632766366 | 0.54318508 | 3.00591167  | 0.00264786 | 0.03127227 |
| FOSL2        | 191.028608 | 1.640217783 | 0.57600895 | 2.847556075 | 0.00440563 | 0.04404061 |
| TBX2         | 64.8163662 | 1.644394203 | 0.4772221  | 3.445762879 | 0.00056945 | 0.01114678 |
| BLOC1S1-RDH5 | 124.161584 | 1.650495541 | 0.58099853 | 2.840791275 | 0.00450018 | 0.04456155 |
| DENND2A      | 311.076386 | 1.655966646 | 0.35980895 | 4.602349804 | 4.18E-06   | 0.00037568 |
| HES1         | 20.5686864 | 1.657118559 | 0.59107334 | 2.803575218 | 0.00505394 | 0.04806252 |
| P4HB         | 2504.00289 | 1.659335944 | 0.48748761 | 3.403852568 | 0.00066443 | 0.0123918  |
| PPP1R14B     | 777.931354 | 1.660987289 | 0.56090065 | 2.961286092 | 0.00306357 | 0.03446835 |
| PRTG         | 82.7664908 | 1.666671085 | 0.53653218 | 3.106376714 | 0.00189395 | 0.02510778 |
| HIST1H1C     | 470.358235 | 1.671553151 | 0.50240083 | 3.327130525 | 0.00087745 | 0.01480393 |
| ATHL1        | 76.6365041 | 1.674667175 | 0.53465747 | 3.132224422 | 0.00173487 | 0.02374885 |
| PLOD1        | 554.677921 | 1.675361553 | 0.42076233 | 3.981728941 | 6.84E-05   | 0.0026551  |
| GAPDH        | 33110.9153 | 1.678900214 | 0.53717062 | 3.125450555 | 0.00177533 | 0.02405193 |
| OMP          | 25.8436594 | 1.682420943 | 0.59935595 | 2.807048015 | 0.00499978 | 0.04776366 |
| DFNA5        | 479.214338 | 1.684184008 | 0.40631755 | 4.144994455 | 3.40E-05   | 0.00165052 |
| KANK2        | 96.7198484 | 1.686768263 | 0.4685784  | 3.599756731 | 0.00031852 | 0.00784799 |
| GLT25D1      | 577.086203 | 1.69122075  | 0.39785693 | 4.250826473 | 2.13E-05   | 0.0011987  |
| CCDC9        | 301.914882 | 1.694413245 | 0.49300282 | 3.436924048 | 0.00058836 | 0.01140347 |
| PRKD2        | 189.414341 | 1.696846983 | 0.43783692 | 3.875522865 | 0.0001064  | 0.00359734 |
| JMJD6        | 137.602642 | 1.702031063 | 0.57853232 | 2.941980947 | 0.0032612  | 0.03586466 |
| GNB2L1       | 12412.0661 | 1.702600052 | 0.45375355 | 3.752257258 | 0.00017525 | 0.00514841 |
| MAP3K6       | 89.9395614 | 1.705669436 | 0.47893092 | 3.561410178 | 0.00036887 | 0.00857325 |
| MREG         | 60.7881022 | 1.709289937 | 0.53871302 | 3.172913749 | 0.00150917 | 0.02152814 |
| DOCK6        | 170.150665 | 1.712422387 | 0.42472519 | 4.031836156 | 5.53E-05   | 0.00232305 |
| TNFRSF1A     | 599.8672   | 1.71289043  | 0.42131772 | 4.065555182 | 4.79E-05   | 0.00208067 |
| OBSL1        | 572.551814 | 1.716569151 | 0.57375124 | 2.991835179 | 0.00277306 | 0.03218128 |
| MVP          | 104.950549 | 1.717675856 | 0.58305522 | 2.945991752 | 0.00321921 | 0.03551911 |
| THBS3        | 53.6450523 | 1.719101172 | 0.56517744 | 3.04170166  | 0.00235245 | 0.02909563 |
| RHOJ         | 150.759452 | 1.723752947 | 0.47274576 | 3.646257831 | 0.00026609 | 0.00691086 |
| RAB13        | 1326.653   | 1.734919579 | 0.51704497 | 3.355452024 | 0.00079235 | 0.01388396 |
| AGXT2L2      | 169.243201 | 1.735930273 | 0.52509301 | 3.305948147 | 0.00094656 | 0.01560015 |
| CHPF         | 557.522295 | 1.740257196 | 0.60335887 | 2.88428213  | 0.00392307 | 0.04056818 |
| PTGFRN       | 238.078875 | 1.743361892 | 0.49461279 | 3.524700371 | 0.00042396 | 0.00939654 |
| CSPG4        | 125.162555 | 1.7454317   | 0.53599246 | 3.256448261 | 0.00112815 | 0.0176349  |
| IL1RAP       | 169.412954 | 1.746051572 | 0.59006732 | 2.959071834 | 0.00308567 | 0.03456533 |
| CD99         | 3156.92494 | 1.750224975 | 0.55680314 | 3.143346082 | 0.00167028 | 0.02329247 |
| AK4          | 630.794129 | 1.750472519 | 0.53694734 | 3.260045045 | 0.00111395 | 0.01754333 |
| LAMA5        | 196.48886  | 1.75598502  | 0.56763057 | 3.093534975 | 0.00197787 | 0.02588487 |
| NLRC5        | 266.21252  | 1.756551815 | 0.62926504 | 2.791433976 | 0.00524751 | 0.04920465 |
| ASAP3        | 149.324545 | 1.756679474 | 0.54681619 | 3.212559378 | 0.00131558 | 0.01963321 |
| LATS2        | 75.3908524 | 1.764335205 | 0.51647322 | 3.416121364 | 0.0006352  | 0.01205857 |
| LIG1         | 412.69122  | 1.772632779 | 0.38105891 | 4.651860191 | 3.29E-06   | 0.000331   |
| PPP2R3B      | 207.92513  | 1.776853726 | 0.55988293 | 3.173616515 | 0.00150552 | 0.02149434 |
| TRIP6        | 792.772472 | 1.789790903 | 0.40312687 | 4.439770804 | 9.01E-06   | 0.00063851 |
| PDIA4        | 241.274038 | 1.794162635 | 0.48018537 | 3.736395901 | 0.00018668 | 0.00538064 |
| SH3PXD2B     | 498.173038 | 1.79708834  | 0.58026632 | 3.097006096 | 0.00195486 | 0.02564359 |
| C1RL         | 67.2925488 | 1.805709364 | 0.58390857 | 3.092452261 | 0.0019851  | 0.02591779 |
| S100A16      | 1712.73603 | 1.821956791 | 0.38941562 | 4.678694701 | 2.89E-06   | 0.00030211 |



|           |            |             |            |             |            |            |
|-----------|------------|-------------|------------|-------------|------------|------------|
| AJUBA     | 38.6988544 | 1.827903699 | 0.64130335 | 2.850294932 | 0.00436787 | 0.04375778 |
| RHBDF1    | 100.589251 | 1.843234784 | 0.44034362 | 4.185900975 | 2.84E-05   | 0.0014777  |
| FABP7     | 3699.33943 | 1.845688542 | 0.65804167 | 2.804820172 | 0.00503447 | 0.04795871 |
| GBE1      | 336.285459 | 1.857152019 | 0.60101712 | 3.090015193 | 0.00200146 | 0.02603141 |
| DHRS13    | 16.2818278 | 1.872253727 | 0.59940961 | 3.123496372 | 0.00178716 | 0.02414104 |
| DBX2      | 47.6946341 | 1.879404573 | 0.54761918 | 3.431955367 | 0.00059925 | 0.01154786 |
| ZNF713    | 1026.94839 | 1.880047048 | 0.64860837 | 2.898585863 | 0.0037485  | 0.03929491 |
| AEN       | 100.816955 | 1.880139408 | 0.48640919 | 3.865345183 | 0.00011093 | 0.00372669 |
| PIP5K1A   | 79.8733829 | 1.882352035 | 0.62416133 | 3.015810099 | 0.00256294 | 0.03079725 |
| SNX33     | 71.2274322 | 1.888617242 | 0.54377145 | 3.47318205  | 0.00051433 | 0.01052709 |
| EVC       | 52.7729123 | 1.889304735 | 0.63355714 | 2.98205895  | 0.00286317 | 0.03295389 |
| HSD3B7    | 28.1715123 | 1.894300767 | 0.5632282  | 3.363291754 | 0.00077019 | 0.01367407 |
| MT2A      | 18018.323  | 1.894708701 | 0.50617121 | 3.743217016 | 0.00018168 | 0.00530024 |
| IGDCC4    | 26.9779563 | 1.899548935 | 0.47363541 | 4.010572067 | 6.06E-05   | 0.00244088 |
| SESN2     | 181.981008 | 1.900980748 | 0.52859387 | 3.596297399 | 0.00032278 | 0.00788368 |
| ADAM19    | 174.604898 | 1.901515468 | 0.49908303 | 3.810018295 | 0.00013896 | 0.00437271 |
| KIAA0040  | 67.0313863 | 1.902921399 | 0.5883355  | 3.234415396 | 0.00121892 | 0.01860376 |
| EMILIN2   | 60.6238128 | 1.903415074 | 0.57680022 | 3.299955498 | 0.000967   | 0.01577621 |
| RAB34     | 180.135091 | 1.91256856  | 0.54266292 | 3.52441355  | 0.00042442 | 0.00939654 |
| ACTN1     | 819.384832 | 1.931700475 | 0.57491487 | 3.359976556 | 0.00077949 | 0.01373015 |
| CEBPG     | 25.9945545 | 1.933395075 | 0.55952312 | 3.455433785 | 0.00054941 | 0.01093486 |
| BATF3     | 25.8855903 | 1.936824631 | 0.4981013  | 3.888415143 | 0.0001009  | 0.00346028 |
| BCL6      | 1231.09227 | 1.939214556 | 0.54487872 | 3.558983864 | 0.00037229 | 0.00860572 |
| C19orf44  | 23.978042  | 1.939818468 | 0.58292143 | 3.327752895 | 0.00087549 | 0.01480393 |
| SHMT2     | 212.16823  | 1.949024976 | 0.49999112 | 3.898119191 | 9.69E-05   | 0.0033519  |
| SNORA80B  | 18.270173  | 1.957258568 | 0.66806089 | 2.929760738 | 0.00339223 | 0.03672877 |
| STBD1     | 99.2715699 | 1.959472913 | 0.49730842 | 3.940156308 | 8.14E-05   | 0.00296817 |
| PCSK5     | 237.64268  | 1.965145729 | 0.6010431  | 3.269558737 | 0.00107715 | 0.01714183 |
| SBNO2     | 133.868837 | 1.968587032 | 0.55586784 | 3.541465957 | 0.00039791 | 0.00901143 |
| PDLIM7    | 320.459845 | 1.977778162 | 0.62224743 | 3.178443254 | 0.00148068 | 0.02121538 |
| GADD45B   | 717.538653 | 1.985224416 | 0.69832472 | 2.842838532 | 0.00447137 | 0.04443343 |
| CNN2      | 77.3958374 | 1.990355388 | 0.59799486 | 3.32838208  | 0.00087352 | 0.01480393 |
| PABPC1L   | 197.445603 | 1.990720168 | 0.56361456 | 3.532059535 | 0.00041234 | 0.00918289 |
| HIST1H2AG | 563.505191 | 1.992984423 | 0.69528816 | 2.866415012 | 0.0041515  | 0.04235686 |
| FAM129A   | 817.858509 | 1.999807287 | 0.50662294 | 3.947328703 | 7.90E-05   | 0.00293226 |
| BCAT1     | 729.442275 | 2.002905216 | 0.62429213 | 3.208281996 | 0.0013353  | 0.01978701 |
| ADAM12    | 40.035887  | 2.017304901 | 0.63269557 | 3.188428978 | 0.00143048 | 0.02081016 |
| CD151     | 1561.43064 | 2.018118763 | 0.50531011 | 3.99382224  | 6.50E-05   | 0.00256465 |
| AKR7A2P1  | 39.2389473 | 2.020294132 | 0.58269461 | 3.467157776 | 0.00052599 | 0.01068777 |
| HSPG2     | 88.662587  | 2.029180635 | 0.65500127 | 3.09797968  | 0.00194845 | 0.02557947 |
| SLC2A3    | 1184.07641 | 2.033143715 | 0.68852457 | 2.952899275 | 0.00314805 | 0.03500978 |
| DNAJB1    | 395.470538 | 2.034119329 | 0.65027016 | 3.128114235 | 0.00175932 | 0.02395187 |
| BHLHE40   | 3012.59884 | 2.034293648 | 0.58705418 | 3.465257056 | 0.00052972 | 0.01073763 |
| CTAGE6P   | 84.7701298 | 2.040712149 | 0.64284502 | 3.174500967 | 0.00150094 | 0.02144716 |
| 9-Sep     | 993.843819 | 2.041808324 | 0.44357624 | 4.603060663 | 4.16E-06   | 0.00037568 |
| PPP1R15A  | 236.621625 | 2.045947764 | 0.652392   | 3.136071182 | 0.00171228 | 0.02360385 |
| METTL21B  | 29.6525794 | 2.050737792 | 0.65130357 | 3.14866661  | 0.00164017 | 0.02296787 |
| GYS1      | 271.03146  | 2.061913249 | 0.45395973 | 4.542062043 | 5.57E-06   | 0.00045005 |

|           |            |             |            |             |            |            |
|-----------|------------|-------------|------------|-------------|------------|------------|
| COL1A2    | 405.947834 | 2.076107995 | 0.61194386 | 3.392644545 | 0.00069221 | 0.01278092 |
| MMP14     | 1137.00186 | 2.077170976 | 0.73290665 | 2.834154899 | 0.00459471 | 0.04512532 |
| FKBP10    | 899.669683 | 2.080793657 | 0.59682951 | 3.486412176 | 0.00048955 | 0.01024853 |
| RAB20     | 50.6658379 | 2.084768058 | 0.65445212 | 3.185516564 | 0.00144496 | 0.02093197 |
| NUPR1     | 2366.73904 | 2.087880658 | 0.63421438 | 3.292073988 | 0.00099451 | 0.0161311  |
| AKAP12    | 1073.79164 | 2.098106152 | 0.74927712 | 2.800173777 | 0.00510751 | 0.04835133 |
| FGF11     | 30.254882  | 2.102112292 | 0.54635153 | 3.847545348 | 0.00011931 | 0.0039157  |
| ITGA7     | 337.520287 | 2.102666704 | 0.46352068 | 4.53629536  | 5.73E-06   | 0.00045812 |
| HIST1H3J  | 484.98931  | 2.118143454 | 0.75403443 | 2.809080535 | 0.00496832 | 0.04757133 |
| EPHB4     | 141.671307 | 2.119116593 | 0.49857501 | 4.250346553 | 2.13E-05   | 0.0011987  |
| EIF4EBP1  | 285.40638  | 2.120715909 | 0.5828422  | 3.638576443 | 0.00027415 | 0.0070656  |
| MDK       | 559.718312 | 2.133238158 | 0.65467191 | 3.258484325 | 0.00112009 | 0.01757423 |
| LTB4R2    | 19.5943781 | 2.142695833 | 0.60328123 | 3.551736294 | 0.0003827  | 0.00879735 |
| AQPEP     | 18.3186084 | 2.143026488 | 0.72916001 | 2.939034565 | 0.00329236 | 0.03602888 |
| FLNA      | 1864.62013 | 2.148236731 | 0.64041705 | 3.354434001 | 0.00079528 | 0.01389169 |
| MTFP1     | 63.4296318 | 2.154870824 | 0.43656403 | 4.935978814 | 7.97E-07   | 0.00012886 |
| TRIP10    | 159.260126 | 2.159127386 | 0.62163214 | 3.473320058 | 0.00051406 | 0.01052709 |
| HIST1H2AB | 64.0885783 | 2.165424916 | 0.63680194 | 3.400468464 | 0.0006727  | 0.01250457 |
| SOX4      | 36.6983485 | 2.197328078 | 0.67212005 | 3.269249435 | 0.00107833 | 0.01714313 |
| SLC39A14  | 204.651533 | 2.200413742 | 0.57768476 | 3.809021646 | 0.00013952 | 0.00438111 |
| ERO1L     | 391.409978 | 2.200790649 | 0.583538   | 3.771460722 | 0.00016229 | 0.00488721 |
| FZD7      | 100.482783 | 2.206671202 | 0.73920658 | 2.985188791 | 0.00283403 | 0.03266331 |
| NRP2      | 832.921902 | 2.207275155 | 0.44413835 | 4.969791833 | 6.70E-07   | 0.00011611 |
| EFEMP1    | 944.664291 | 2.210091546 | 0.57194932 | 3.864138745 | 0.00011148 | 0.00373175 |
| SNORA38   | 939.819458 | 2.215330057 | 0.72607832 | 3.051089655 | 0.00228012 | 0.0286148  |
| CDKN1A    | 437.385044 | 2.218037121 | 0.64065759 | 3.462125707 | 0.00053593 | 0.01075951 |
| ODZ1      | 490.165736 | 2.221742951 | 0.74049436 | 3.000350945 | 0.00269669 | 0.03164464 |
| PCOLCE    | 64.0561148 | 2.222677682 | 0.74739151 | 2.973913466 | 0.00294028 | 0.03365699 |
| IL32      | 134.078907 | 2.227884233 | 0.64959368 | 3.429658099 | 0.00060434 | 0.01161941 |
| GFPT2     | 327.909404 | 2.234973892 | 0.48097485 | 4.646758346 | 3.37E-06   | 0.00033727 |
| JAG1      | 658.277833 | 2.236540214 | 0.52064213 | 4.295734194 | 1.74E-05   | 0.00104869 |
| TAGLN     | 1391.55372 | 2.240512517 | 0.75364567 | 2.972899064 | 0.00295001 | 0.03372248 |
| VIM       | 41422.1978 | 2.250537269 | 0.67509356 | 3.333667218 | 0.00085709 | 0.01460706 |
| TGFB1I1   | 74.943367  | 2.250653866 | 0.60867319 | 3.697639242 | 0.00021761 | 0.00604313 |
| EMP3      | 964.361033 | 2.256134681 | 0.56650942 | 3.982519249 | 6.82E-05   | 0.00265241 |
| SERPINH1  | 805.727292 | 2.268386876 | 0.65676723 | 3.453867314 | 0.00055261 | 0.01095052 |
| PFKFB4    | 166.494164 | 2.269636389 | 0.60267088 | 3.765963233 | 0.00016591 | 0.00493437 |
| TRIB2     | 796.588682 | 2.277775857 | 0.43754012 | 5.205867368 | 1.93E-07   | 5.10E-05   |
| TNFAIP2   | 68.241535  | 2.290999052 | 0.66321726 | 3.454371882 | 0.00055158 | 0.01095052 |
| GBP2      | 2171.68075 | 2.291144493 | 0.76700242 | 2.98714114  | 0.002816   | 0.03250001 |
| PLOD2     | 843.674292 | 2.291661064 | 0.71363678 | 3.211242925 | 0.00132162 | 0.01966384 |
| HIST1H1D  | 421.300585 | 2.293100927 | 0.48836658 | 4.69545011  | 2.66E-06   | 0.00029384 |
| KCNE4     | 11.473221  | 2.297065813 | 0.59405335 | 3.866766853 | 0.00011029 | 0.00371492 |
| EVC2      | 68.2006763 | 2.29932037  | 0.70553275 | 3.258984587 | 0.00111812 | 0.01757423 |
| STK17A    | 176.434862 | 2.321475048 | 0.44719759 | 5.191161773 | 2.09E-07   | 5.24E-05   |
| FBLIM1    | 95.0171502 | 2.329938111 | 0.60385955 | 3.858410612 | 0.00011413 | 0.0038127  |
| HK2       | 470.564994 | 2.3401345   | 0.71065215 | 3.292939462 | 0.00099146 | 0.01609707 |
| PPP1R3B   | 83.805536  | 2.346609068 | 0.63999914 | 3.666581608 | 0.00024581 | 0.00652554 |

|           |            |             |            |             |            |            |
|-----------|------------|-------------|------------|-------------|------------|------------|
| STEAP3    | 406.250613 | 2.359708081 | 0.82108593 | 2.873886888 | 0.00405454 | 0.04163439 |
| ZC3H12A   | 33.9383057 | 2.373364263 | 0.63387821 | 3.744196005 | 0.00018097 | 0.00528915 |
| LANCL2    | 990.299975 | 2.377326094 | 0.72515007 | 3.278391872 | 0.001044   | 0.01674588 |
| IGFBP2    | 3001.90922 | 2.390776987 | 0.84193413 | 2.839624747 | 0.00451666 | 0.04462122 |
| COL4A2    | 639.13972  | 2.396894208 | 0.66052541 | 3.628769102 | 0.00028478 | 0.0072396  |
| ARAP3     | 124.509932 | 2.397381892 | 0.5042525  | 4.75432826  | 1.99E-06   | 0.00024422 |
| SLC16A3   | 403.340363 | 2.40084097  | 0.71890664 | 3.339572687 | 0.00083907 | 0.01441647 |
| EHD2      | 329.02593  | 2.411928918 | 0.51525514 | 4.681038027 | 2.85E-06   | 0.00030165 |
| ACPL2     | 1787.96918 | 2.419277501 | 0.5219312  | 4.635242183 | 3.57E-06   | 0.00034431 |
| HIST1H2AJ | 559.964738 | 2.420232606 | 0.77148665 | 3.137102388 | 0.00170627 | 0.02357901 |
| TNFRSF10B | 1147.87575 | 2.42197659  | 0.56091255 | 4.317921897 | 1.58E-05   | 0.000966   |
| AFAP1L1   | 196.318462 | 2.422099109 | 0.45720233 | 5.297652594 | 1.17E-07   | 3.73E-05   |
| C1R       | 447.820373 | 2.439112323 | 0.6718668  | 3.630351031 | 0.00028304 | 0.00720627 |
| DPP4      | 54.0354535 | 2.439344122 | 0.67875107 | 3.593871507 | 0.0003258  | 0.00794047 |
| DIAPH3    | 10.4313419 | 2.439415545 | 0.86751354 | 2.811962499 | 0.00492402 | 0.04733599 |
| NAMPT     | 3681.56053 | 2.444139398 | 0.68089332 | 3.589606968 | 0.00033118 | 0.00800733 |
| PHKG1     | 191.476664 | 2.447342745 | 0.85689241 | 2.856067712 | 0.00428924 | 0.04323715 |
| CARS      | 44.1385399 | 2.451152164 | 0.71419403 | 3.432053584 | 0.00059903 | 0.01154786 |
| FAM83G    | 11.2991402 | 2.480032152 | 0.85910052 | 2.886777613 | 0.00389209 | 0.04029742 |
| MPZL2     | 21.886922  | 2.501190815 | 0.68778355 | 3.636595878 | 0.00027626 | 0.00707977 |
| TGIF1     | 26.22697   | 2.505762041 | 0.74746389 | 3.352351982 | 0.00080128 | 0.01395308 |
| SLC2A1    | 3826.85702 | 2.51000361  | 0.6421536  | 3.908727754 | 9.28E-05   | 0.00325535 |
| PALM3     | 27.9094074 | 2.52160377  | 0.54316073 | 4.642463312 | 3.44E-06   | 0.00033898 |
| IGFBP5    | 19994.2296 | 2.523317823 | 0.75405383 | 3.346336454 | 0.00081887 | 0.01420817 |
| STAC      | 32.6001698 | 2.526420182 | 0.88424641 | 2.857144983 | 0.00427471 | 0.04316836 |
| TNC       | 2316.40242 | 2.531675114 | 0.81622097 | 3.101703117 | 0.00192411 | 0.0254188  |
| GRB10     | 1970.85845 | 2.535827942 | 0.54634393 | 4.641449846 | 3.46E-06   | 0.00033898 |
| COL28A1   | 419.773216 | 2.545180814 | 0.6682687  | 3.808618899 | 0.00013975 | 0.00438111 |
| C15orf42  | 26.4705045 | 2.547703604 | 0.6660267  | 3.82522743  | 0.00013065 | 0.00416936 |
| DPF3      | 326.630348 | 2.552022202 | 0.5527809  | 4.616697519 | 3.90E-06   | 0.00036551 |
| GADD45A   | 377.509732 | 2.552735849 | 0.69387642 | 3.678948841 | 0.0002342  | 0.00630681 |
| ADAMTS9   | 660.411873 | 2.570224287 | 0.52872775 | 4.861148799 | 1.17E-06   | 0.00017203 |
| FREM2     | 138.912008 | 2.57039514  | 0.78721353 | 3.265181621 | 0.00109394 | 0.01734203 |
| TUBB6     | 210.466227 | 2.572255006 | 0.72191992 | 3.56307526  | 0.00036654 | 0.00853084 |
| RDH10     | 369.63482  | 2.576547903 | 0.70519767 | 3.653653466 | 0.00025854 | 0.00675649 |
| PLIN2     | 1912.21289 | 2.579092396 | 0.80590599 | 3.200239756 | 0.00137313 | 0.02022272 |
| MMP19     | 30.5861396 | 2.583133828 | 0.82679792 | 3.124262615 | 0.00178251 | 0.02409762 |
| FER1L4    | 68.1696247 | 2.595573331 | 0.78278712 | 3.315809955 | 0.00091378 | 0.01524841 |
| ZNF395    | 425.011514 | 2.599051003 | 0.57156712 | 4.547236696 | 5.44E-06   | 0.00044339 |
| ITGA3     | 208.4517   | 2.599501284 | 0.6490891  | 4.004845065 | 6.21E-05   | 0.00248071 |
| ICAM1     | 113.551421 | 2.600955383 | 0.62335934 | 4.172481639 | 3.01E-05   | 0.00152753 |
| LOC646329 | 35.3534832 | 2.624773244 | 0.6916132  | 3.795146258 | 0.00014756 | 0.00454961 |
| ETV4      | 11.8077497 | 2.625075643 | 0.80721944 | 3.25199756  | 0.00114597 | 0.01776465 |
| MMP9      | 52.6714203 | 2.627490248 | 0.8544831  | 3.074947001 | 0.0021054  | 0.02700697 |
| SERPINE1  | 1250.36381 | 2.640923527 | 0.83385056 | 3.16714249  | 0.00153945 | 0.0218123  |
| SOD2      | 16606.8993 | 2.650359547 | 0.66514411 | 3.984639572 | 6.76E-05   | 0.00263494 |
| CNGA3     | 184.071574 | 2.663363189 | 0.86440023 | 3.081168996 | 0.0020619  | 0.02657063 |
| SDC1      | 38.01046   | 2.672070382 | 0.83057183 | 3.217145447 | 0.00129473 | 0.01942557 |

|           |            |             |            |             |            |            |
|-----------|------------|-------------|------------|-------------|------------|------------|
| FAM20C    | 522.669934 | 2.692003162 | 0.58667513 | 4.588575524 | 4.46E-06   | 0.00038639 |
| MT1X      | 4334.71829 | 2.694467866 | 0.69870079 | 3.856397315 | 0.00011507 | 0.00383659 |
| TRIB3     | 227.640989 | 2.721558566 | 0.76229298 | 3.570226448 | 0.00035667 | 0.00837085 |
| RPL17     | 25.0906106 | 2.741472643 | 0.71343507 | 3.842637929 | 0.00012172 | 0.00396644 |
| HIST1H2BI | 118.169096 | 2.753503035 | 0.67601569 | 4.073134816 | 4.64E-05   | 0.00204701 |
| HIST1H3F  | 668.896779 | 2.753520649 | 0.77804742 | 3.539013937 | 0.00040162 | 0.00905404 |
| TMEM45A   | 60.8951456 | 2.756779402 | 0.71026755 | 3.881325313 | 0.00010389 | 0.00354107 |
| SYNPO     | 18.7325319 | 2.764680593 | 0.69268725 | 3.991239298 | 6.57E-05   | 0.00257461 |
| MEX3A     | 43.7588846 | 2.767792925 | 0.73353534 | 3.773223691 | 0.00016115 | 0.00486175 |
| COL3A1    | 309.104657 | 2.769916425 | 0.8709973  | 3.180166481 | 0.0014719  | 0.02118996 |
| TREM1     | 85.6795153 | 2.778164234 | 0.91812101 | 3.02592381  | 0.00247875 | 0.03011777 |
| COL4A1    | 758.131934 | 2.779967393 | 0.75400606 | 3.686929782 | 0.00022698 | 0.0062119  |
| PCDHGB2   | 53.813729  | 2.783036076 | 0.79898818 | 3.483200563 | 0.00049546 | 0.01030645 |
| TMEM158   | 532.606656 | 2.800275164 | 0.62847492 | 4.455667329 | 8.36E-06   | 0.00060316 |
| STC1      | 295.932166 | 2.816942385 | 0.86652852 | 3.250836308 | 0.00115066 | 0.01779648 |
| ITGA5     | 429.140742 | 2.836513702 | 0.57658722 | 4.919487676 | 8.68E-07   | 0.00013756 |
| STC2      | 308.009657 | 2.855614546 | 0.881218   | 3.240531323 | 0.00119307 | 0.01834632 |
| WWTR1     | 2211.14098 | 2.857121342 | 0.56514734 | 5.055533577 | 4.29E-07   | 8.39E-05   |
| PDPN      | 891.106608 | 2.866608144 | 0.80067327 | 3.580247089 | 0.00034327 | 0.00815884 |
| SYCE2     | 15.2930875 | 2.893203201 | 0.74639989 | 3.876210647 | 0.0001061  | 0.00359472 |
| JUN       | 27.5897877 | 2.895805116 | 0.7206867  | 4.01811925  | 5.87E-05   | 0.0023973  |
| ACCN4     | 109.801781 | 2.917489224 | 0.62006709 | 4.705118612 | 2.54E-06   | 0.00028614 |
| GJD3      | 7.5705467  | 2.920601811 | 0.86856541 | 3.362558294 | 0.00077224 | 0.01367407 |
| C5orf62   | 144.248561 | 2.934768056 | 0.64537759 | 4.547365929 | 5.43E-06   | 0.00044339 |
| POU3F4    | 161.048467 | 2.936728353 | 0.4621414  | 6.354610038 | 2.09E-10   | 3.19E-07   |
| CLCF1     | 17.3647117 | 2.939045989 | 0.94337284 | 3.115465972 | 0.00183655 | 0.02453204 |
| TNFRSF19  | 108.858592 | 2.956224992 | 0.68635996 | 4.307105849 | 1.65E-05   | 0.00101071 |
| MT1H      | 55.8506766 | 2.968014788 | 0.76792956 | 3.864957099 | 0.00011111 | 0.00372669 |
| AEBP1     | 639.467612 | 2.975906711 | 0.8628661  | 3.448862697 | 0.00056295 | 0.01110312 |
| IGFBP3    | 1023.63918 | 2.981396889 | 0.75093254 | 3.970259306 | 7.18E-05   | 0.00274814 |
| TEAD4     | 135.759938 | 2.995412063 | 0.58691842 | 5.103625902 | 3.33E-07   | 7.14E-05   |
| VOPP1     | 1056.03268 | 3.004355207 | 0.69052415 | 4.350832937 | 1.36E-05   | 0.00085676 |
| DNAH11    | 37.3772872 | 3.037710889 | 0.8399481  | 3.616545956 | 0.00029856 | 0.00747691 |
| FBN2      | 151.973604 | 3.040859029 | 0.90716563 | 3.352043909 | 0.00080217 | 0.01395416 |
| C8orf4    | 1023.56577 | 3.054177884 | 0.72607777 | 4.206406003 | 2.59E-05   | 0.00138855 |
| CHI3L1    | 31282.2317 | 3.059634538 | 1.01140404 | 3.025135776 | 0.00248522 | 0.03013099 |
| ARSJ      | 61.2712218 | 3.069389451 | 0.70473722 | 4.355367328 | 1.33E-05   | 0.00084879 |
| MRC2      | 1008.33463 | 3.0746664   | 0.55204367 | 5.569607153 | 2.55E-08   | 1.30E-05   |
| TUBA1C    | 4846.93789 | 3.080654628 | 0.68373461 | 4.505629216 | 6.62E-06   | 0.00051555 |
| NPNT      | 122.938611 | 3.080827963 | 0.65660549 | 4.692053325 | 2.70E-06   | 0.00029384 |
| TEAD3     | 84.2309831 | 3.087803462 | 0.51707101 | 5.971720337 | 2.35E-09   | 1.88E-06   |
| WEE1      | 431.755166 | 3.102453508 | 0.71800841 | 4.3209153   | 1.55E-05   | 0.00095995 |
| DMBX1     | 7.00567702 | 3.157158736 | 1.06326115 | 2.969316372 | 0.00298463 | 0.03393277 |
| HILPDA    | 8.24888191 | 3.178818341 | 0.90386165 | 3.516930212 | 0.00043657 | 0.00957715 |
| GPRC5A    | 127.398981 | 3.181658713 | 1.05725652 | 3.009353607 | 0.00261804 | 0.03108286 |
| SPOCD1    | 255.207527 | 3.204135281 | 0.92340597 | 3.46990966  | 0.00052063 | 0.01060451 |
| FAM115C   | 17.3061808 | 3.21120844  | 0.75350931 | 4.261670567 | 2.03E-05   | 0.00116767 |
| USP6      | 89.5188018 | 3.227858958 | 1.13765959 | 2.837280137 | 0.00454997 | 0.04486951 |

|           |            |             |            |             |            |            |
|-----------|------------|-------------|------------|-------------|------------|------------|
| PTX3      | 77.3089805 | 3.276527044 | 0.77736592 | 4.214909565 | 2.50E-05   | 0.00134582 |
| HSPA6     | 1011.50921 | 3.342593344 | 0.87869346 | 3.804049405 | 0.00014235 | 0.00442153 |
| LRRN4CL   | 18.5642129 | 3.349395137 | 0.8893135  | 3.766270449 | 0.0001657  | 0.00493437 |
| CD44      | 19.1887542 | 3.36296753  | 1.01154888 | 3.32457243  | 0.00088554 | 0.01491563 |
| ANGPTL4   | 210.239335 | 3.373154678 | 0.775141   | 4.351665926 | 1.35E-05   | 0.00085673 |
| FKBP9L    | 10.1783559 | 3.485569026 | 1.00640792 | 3.463375999 | 0.00053344 | 0.01074772 |
| HIST1H2BJ | 130.962706 | 3.49216146  | 1.10279469 | 3.166646959 | 0.00154207 | 0.0218123  |
| AMH       | 24.3742949 | 3.495976693 | 1.08759485 | 3.214410862 | 0.00130712 | 0.01953678 |
| CPA4      | 25.1218839 | 3.544531772 | 0.8269953  | 4.286036175 | 1.82E-05   | 0.00107622 |
| NHLH1     | 7.40895937 | 3.586108168 | 1.17129678 | 3.061656311 | 0.00220116 | 0.02788228 |
| C2CD4A    | 11.0590447 | 3.588203008 | 1.00130014 | 3.583543908 | 0.00033896 | 0.00813707 |
| ESR2      | 9.80794201 | 3.596559751 | 0.91979239 | 3.910186442 | 9.22E-05   | 0.00324895 |
| KCTD14    | 5.94127901 | 3.609162838 | 1.06772314 | 3.380242216 | 0.00072422 | 0.01321356 |
| VEGFA     | 12655.985  | 3.61631119  | 0.96815106 | 3.73527575  | 0.00018751 | 0.0053954  |
| C1QTNF1   | 31.3613485 | 3.620236182 | 1.05758831 | 3.423105336 | 0.0006191  | 0.01182201 |
| PI3       | 29.1587736 | 3.628204157 | 0.88710895 | 4.089919457 | 4.32E-05   | 0.00195981 |
| DUSP4     | 149.331395 | 3.631683876 | 0.69313806 | 5.23948123  | 1.61E-07   | 4.44E-05   |
| SEC61G    | 6935.98438 | 3.635220017 | 0.78360759 | 4.639082172 | 3.50E-06   | 0.00033993 |
| METTL7B   | 381.12075  | 3.643255798 | 0.63352484 | 5.750770287 | 8.88E-09   | 5.74E-06   |
| MGC12916  | 56.5103889 | 3.696333975 | 0.78849079 | 4.687859421 | 2.76E-06   | 0.00029549 |
| MMP7      | 61.3779873 | 3.696982331 | 1.09902722 | 3.363867852 | 0.00076858 | 0.01367251 |
| ABCC3     | 152.624885 | 3.72383955  | 1.09262758 | 3.408150797 | 0.00065405 | 0.01229375 |
| CXCL3     | 45.4490207 | 3.906225965 | 1.08386168 | 3.603989351 | 0.00031337 | 0.00774392 |
| SP8       | 13.1739023 | 3.972708818 | 1.31855047 | 3.012936485 | 0.00258733 | 0.03095989 |
| CHRNA1    | 44.4452729 | 4.049030559 | 0.90647317 | 4.46679579  | 7.94E-06   | 0.00058112 |
| CHRD2     | 13.0670304 | 4.051196843 | 0.90713674 | 4.465916403 | 7.97E-06   | 0.00058112 |
| CA12      | 350.819193 | 4.180340795 | 0.8387615  | 4.983944556 | 6.23E-07   | 0.00011137 |
| SCNN1G    | 24.143647  | 4.246342883 | 1.06725621 | 3.978747416 | 6.93E-05   | 0.00266783 |
| HIST1H2BO | 135.488512 | 4.281346782 | 1.02315487 | 4.184456227 | 2.86E-05   | 0.00148254 |
| GOLGA8B   | 121.12628  | 4.318035511 | 1.0751436  | 4.016240716 | 5.91E-05   | 0.00240067 |
| GDF15     | 68.600999  | 4.406109958 | 0.90426466 | 4.872588925 | 1.10E-06   | 0.00016508 |
| MATL2963  | 3.84847241 | 4.479716931 | 1.40741709 | 3.182934861 | 0.0014579  | 0.02106502 |
| HS3ST3A1  | 28.1070159 | 4.534739091 | 0.84548655 | 5.363466852 | 8.16E-08   | 2.98E-05   |
| PLA2G2A   | 392.968763 | 4.594049069 | 1.06239268 | 4.324247661 | 1.53E-05   | 0.00094904 |
| H19       | 120.958901 | 4.645498699 | 0.98369765 | 4.722486301 | 2.33E-06   | 0.00027    |
| CHRNA9    | 19.9404049 | 4.70153278  | 1.20225935 | 3.910581159 | 9.21E-05   | 0.00324895 |
| ADM       | 1799.5495  | 4.75258268  | 0.90617309 | 5.244674253 | 1.57E-07   | 4.38E-05   |
| SAA2-SAA4 | 9.46699129 | 4.828101386 | 1.59705571 | 3.023126465 | 0.00250178 | 0.0302445  |
| C6orf141  | 383.516594 | 4.873694596 | 0.89712902 | 5.432545914 | 5.56E-08   | 2.22E-05   |
| GJA3      | 16.9717761 | 4.981245196 | 1.26758686 | 3.929707178 | 8.50E-05   | 0.00308011 |
| POSTN     | 373.953954 | 5.02471421  | 0.81794659 | 6.143083504 | 8.09E-10   | 8.63E-07   |
| LIF       | 15.0786244 | 5.217353554 | 1.32243374 | 3.945266501 | 7.97E-05   | 0.00293743 |
| TCF23     | 9.00876614 | 5.237463919 | 1.19620496 | 4.378400089 | 1.20E-05   | 0.00078622 |
| EGFR      | 14356.2295 | 5.365523448 | 0.83719267 | 6.408947027 | 1.47E-10   | 3.08E-07   |
| HMGA2     | 18.0092384 | 5.724085522 | 1.24481229 | 4.598352351 | 4.26E-06   | 0.00037568 |
| UPK3BL    | 65.0217479 | 23.02133542 | 2.98701191 | 7.707145506 | 1.29E-14   | 5.41E-11   |
